# Supplementary material for: Non-redox metal ion promoted oxidative coupling of indoles with olefins by the palladium(ii) acetate catalyst through dioxygen activation: experimental results with DFT calculations
Source: Royal Society of Chemistry journal article supplement (doi:10.1039/c6ob00401f), 2016-01-01
Supplement: c6ob00401f1.pdf [file c6ob00401f1.pdf]

Electronic Supplementary Material (ESI) for  
**Non-redox Metal Ions Promoted Oxidative Coupling of Indoles with  
Olefins by Palladium(II) Acetate Catalyst Through Dioxygen  
Activation: Experimental Results with DFT Calculations**

Sicheng Zhang, Zhuqi Chen, Shuhao Qin, Chenlin Lou, Ahmed M. Senan, Rongzhen Liao\*, Guochuan Yin\*

School of Chemistry and Chemical Engineering, Hubei Key Laboratory of Material Chemistry and Service Failure, Huazhong University of Science and Technology, Wuhan 430074, PR China; Key laboratory of Material Chemistry for Energy Conversion and Storage (Huazhong University of Science and Technology), Ministry of Education, PR China

| <b>Table of Contents</b>                                                                                                             | <b>Pages</b> |
|--------------------------------------------------------------------------------------------------------------------------------------|--------------|
| 1. Procedure for synthesis of N-substituted indoles                                                                                  | S2           |
| 2. Procedure for synthesis of intermediate methyl 3-(1H-indol-3-yl)propanoate ( <b>5aa</b> )                                         | S3           |
| 3. <sup>1</sup> H NMR studies on the interaction among Pd(OAc) <sub>2</sub> , Sc(OTf) <sub>3</sub> and methyl acrylate ( <b>2a</b> ) | S4           |
| 4. <sup>1</sup> H NMR kinetics of the interaction between Pd(OAc) <sub>2</sub> /Sc(OTf) <sub>3</sub> and indole ( <b>1a</b> )        | S5           |
| 5. <sup>1</sup> H NMR spectra of Pd(OAc) <sub>2</sub> /Sc(OTf) <sub>3</sub> with related compounds                                   | S6           |
| 6. <sup>13</sup> C NMR spectra of Pd(OAc) <sub>2</sub> , Sc(OTf) <sub>3</sub> and Pd(OAc) <sub>2</sub> /Sc(OTf) <sub>3</sub>         | S7           |
| 7. Detection of the formation of H <sub>2</sub> O <sub>2</sub> through HPLC                                                          | S8           |
| 8. Characterization data, <sup>1</sup> H NMR and <sup>13</sup> C NMR spectra of 3-vinylindoles and bis(indolyl) products             | S9           |
| 9. References                                                                                                                        | S39          |
| 10. Optimized structures for all stationary points                                                                                   | S40          |
| 11. Cartesian coordinates for all stationary points                                                                                  | S44          |

## Procedure for synthesis of N-substituted indoles

1-methylindole (**1b**) was prepared according to the literature procedures.<sup>1</sup> Yield 82%; <sup>1</sup>H NMR (400 MHz, CDCl<sub>3</sub>) δ 7.63 (d, *J* = 7.9 Hz, 1H), 7.33 (d, *J* = 8.1 Hz, 1H), 7.23 (t, *J* = 8.1 Hz, 1H), 7.11 (t, *J* = 8.1 Hz, 1H), 7.05 (d, *J* = 3.1 Hz, 1H), 6.49 (d, *J* = 2.9 Hz, 1H), 3.80 (s, 3H).

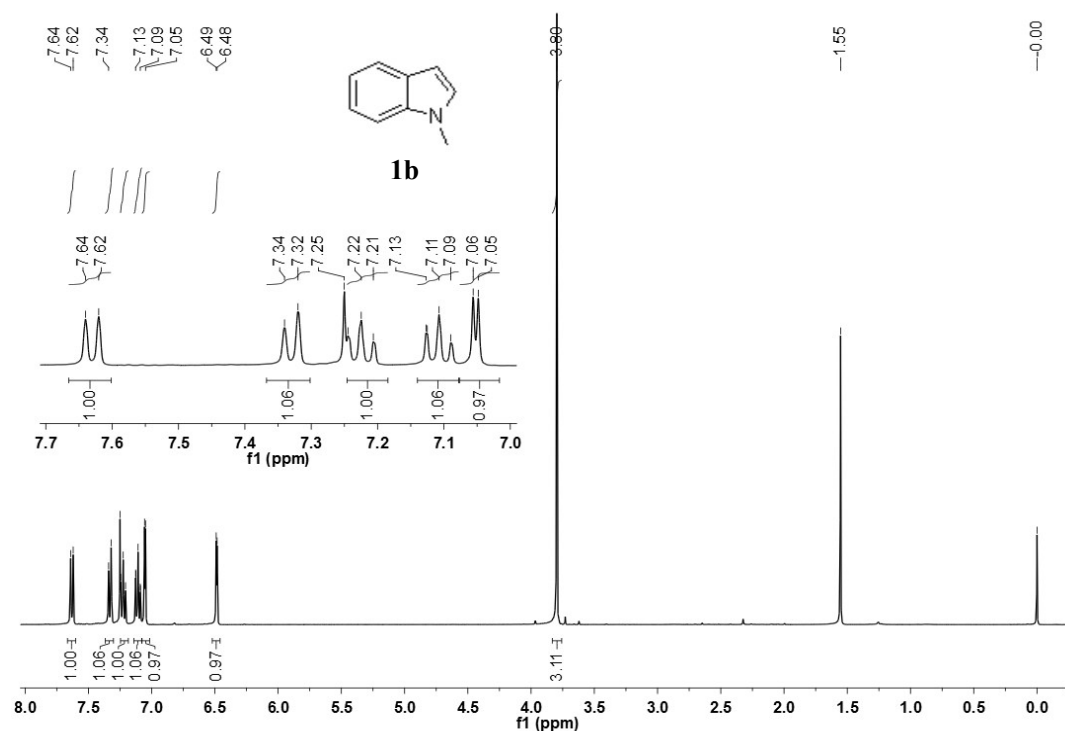

1-benzylindole (**1c**) was prepared according to the literature procedures.<sup>1</sup> Yield 75%; <sup>1</sup>H NMR (400 MHz, CDCl<sub>3</sub>) δ 7.65 (d, *J* = 7.7 Hz, 1H), 7.37-7.20 (m, 4H), 7.20-7.05 (m, 5H), 6.55 (d, *J* = 3.1 Hz, 1H), 5.33 (s, 2H).

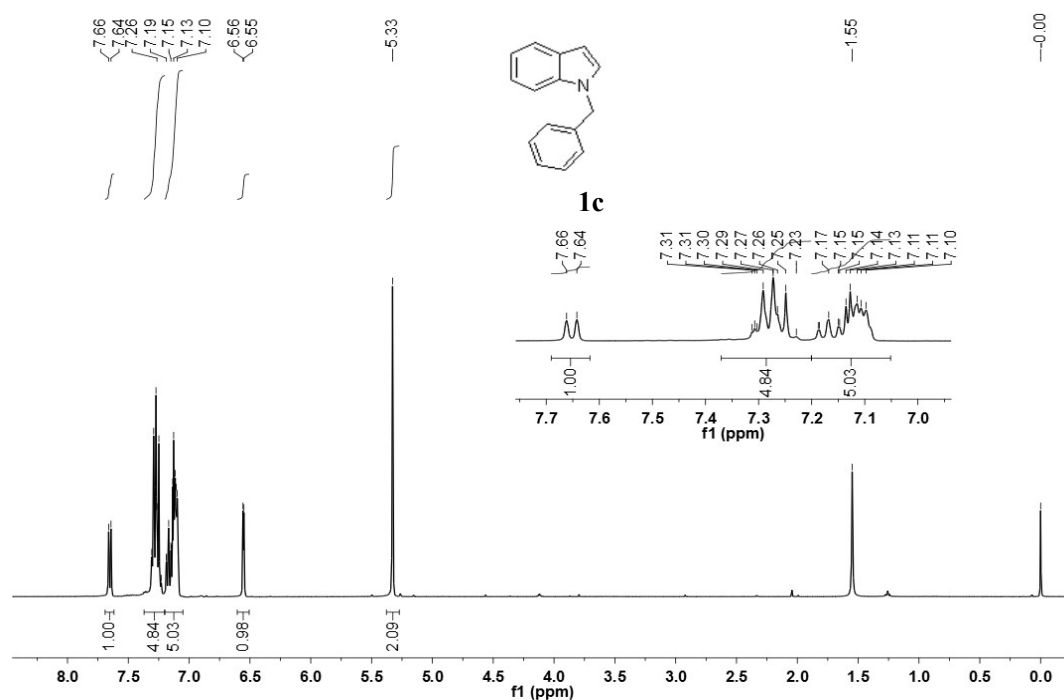

### Procedure for synthesis of intermediate methyl 3-(1*H*-indol-3-yl)propanoate (**5aa**)

3-(1*H*-indol-3-yl)propanoate (**5aa**) was synthesized according to the literature procedures.<sup>2</sup> Yield 89%; <sup>1</sup>H NMR (400 MHz, CDCl<sub>3</sub>) δ 7.96 (s, 1H), 7.60 (d, *J* = 7.7 Hz, 1H), 7.36 (d, *J* = 8.1 Hz, 1H), 7.20 (td, *J*<sub>1</sub> = 8.0 Hz, *J*<sub>2</sub> = 1.0 Hz, 1H), 7.12 (td, *J*<sub>1</sub> = 8.0 Hz, *J*<sub>2</sub> = 1.0 Hz, 1H), 7.02 (d, *J* = 2.1 Hz, 1H), 3.68 (s, 3H), 3.11 (t, *J* = 7.7 Hz, 2H), 2.73 (t, *J* = 7.7 Hz, 2H).

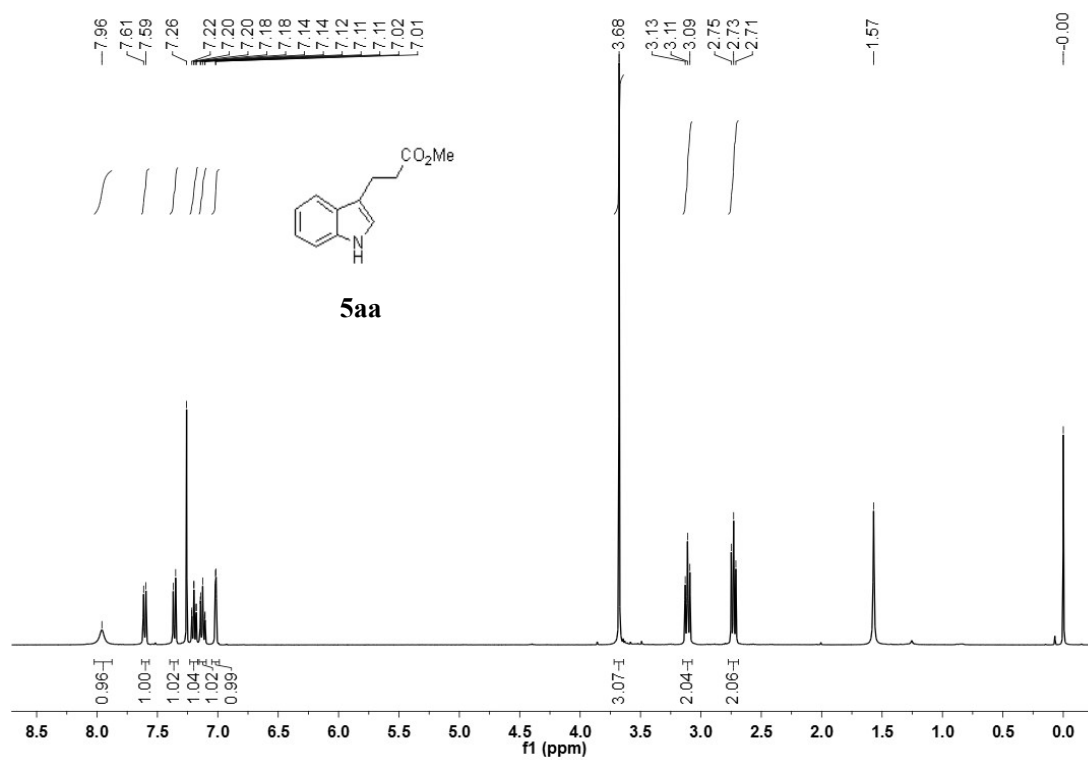

## $^1\text{H}$ NMR studies on the interaction among $\text{Pd}(\text{OAc})_2$ , $\text{Sc}(\text{OTf})_3$ and methyl acrylate (**2a**)

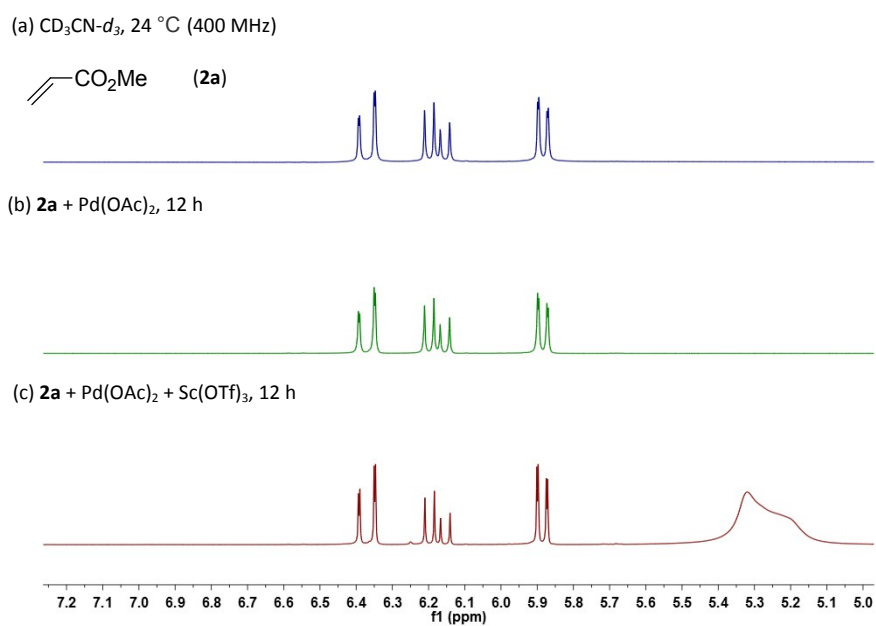

Figure S1.  $^1\text{H}$  NMR studies on the interaction among  $\text{Pd}(\text{OAc})_2$ ,  $\text{Sc}(\text{OTf})_3$  and methyl acrylate (**2a**) in the absence of indole derivative at 25 °C. (a)  $^1\text{H}$  NMR spectrum of indole in  $\text{CD}_3\text{CN}-d_3$ ; (b)  $^1\text{H}$  NMR spectrum of the reaction mixture after 12 h by the addition of  $\text{Pd}(\text{OAc})_2$ ; (c)  $^1\text{H}$  NMR spectrum of the reaction mixture after 12 h by addition of  $\text{Pd}(\text{OAc})_2$  and  $\text{Sc}(\text{OTf})_3$ .

## $^1\text{H}$ NMR kinetics of the interaction between $\text{Pd}(\text{OAc})_2/\text{Sc}(\text{OTf})_3$ and indole (**1a**)

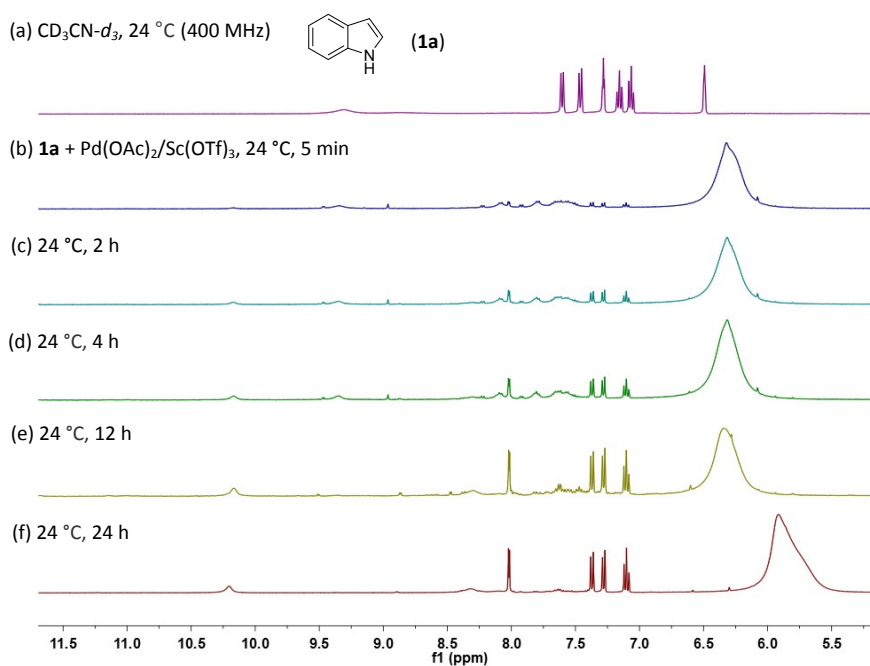

Figure S2.  $^1\text{H}$  NMR kinetics of the interaction between  $\text{Pd}(\text{OAc})_2/\text{Sc}(\text{OTf})_3$  and indole (**1a**) in the absence of acrylate substrate at 25 °C. (a)  $^1\text{H}$  NMR spectrum of indole in  $\text{CD}_3\text{CN}-d_3$ . (b-f)  $^1\text{H}$  NMR spectra of the reaction mixture after 5 min, 2, 4, 12 and 24 h by addition of  $\text{Pd}(\text{OAc})_2/\text{Sc}(\text{OTf})_3$ .

**$^1\text{H}$  NMR spectra of  $\text{Pd}(\text{OAc})_2/\text{Sc}(\text{OTf})_3$  with related compounds**

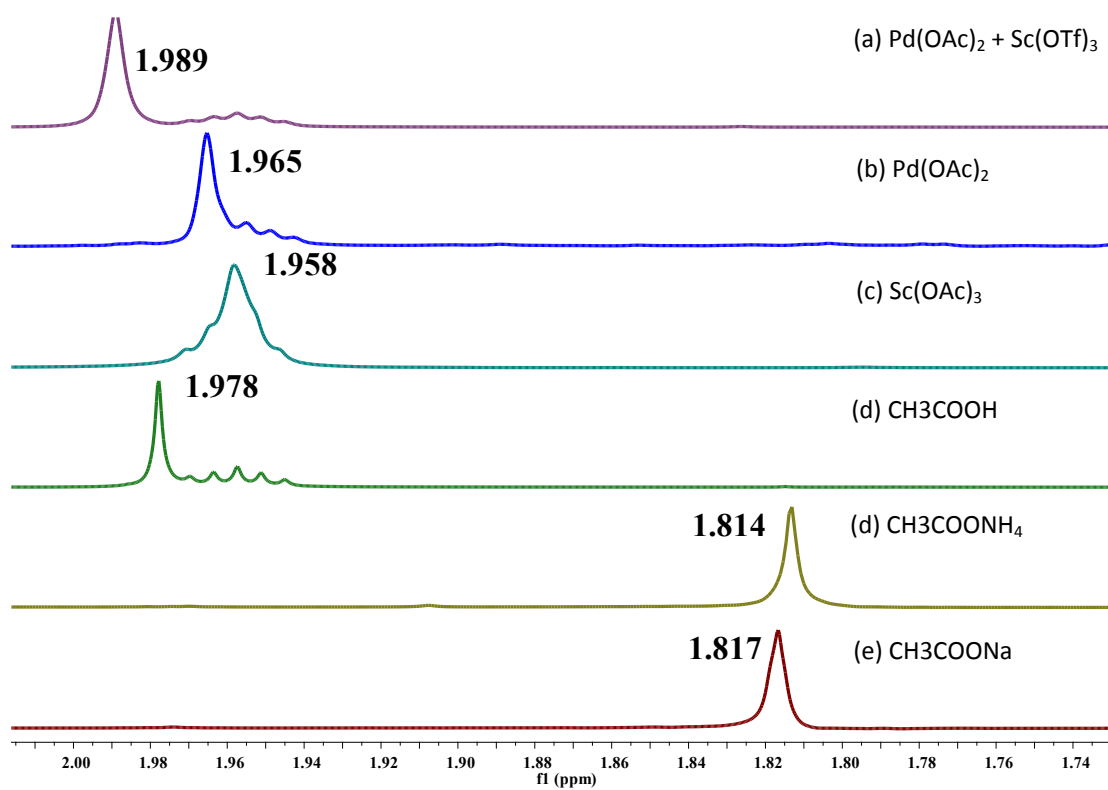

Figure S3.  $^1\text{H}$  NMR spectra of  $\text{Pd}(\text{OAc})_2/\text{Sc}(\text{OTf})_3$  with related compounds in  $\text{CD}_3\text{CN}$ .

**$^{13}\text{C}$  NMR spectra of  $\text{Pd}(\text{OAc})_2$ ,  $\text{Sc}(\text{OTf})_3$  and  $\text{Pd}(\text{OAc})_2/\text{Sc}(\text{OTf})_3$**

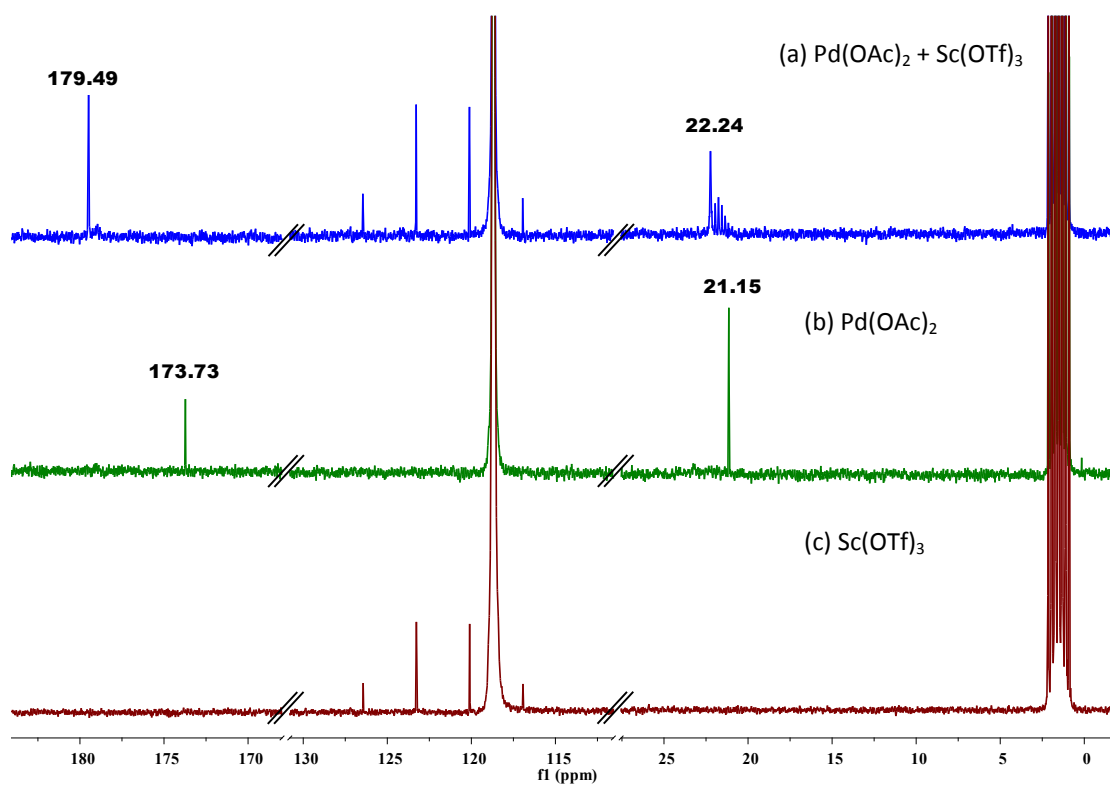

Figure S4.  $^{13}\text{C}$  NMR spectra of  $\text{Pd}(\text{OAc})_2$ ,  $\text{Sc}(\text{OTf})_3$  and their mixture in  $\text{CD}_3\text{CN}$

## Detection of the formation of H<sub>2</sub>O<sub>2</sub> through HPLC

(a)

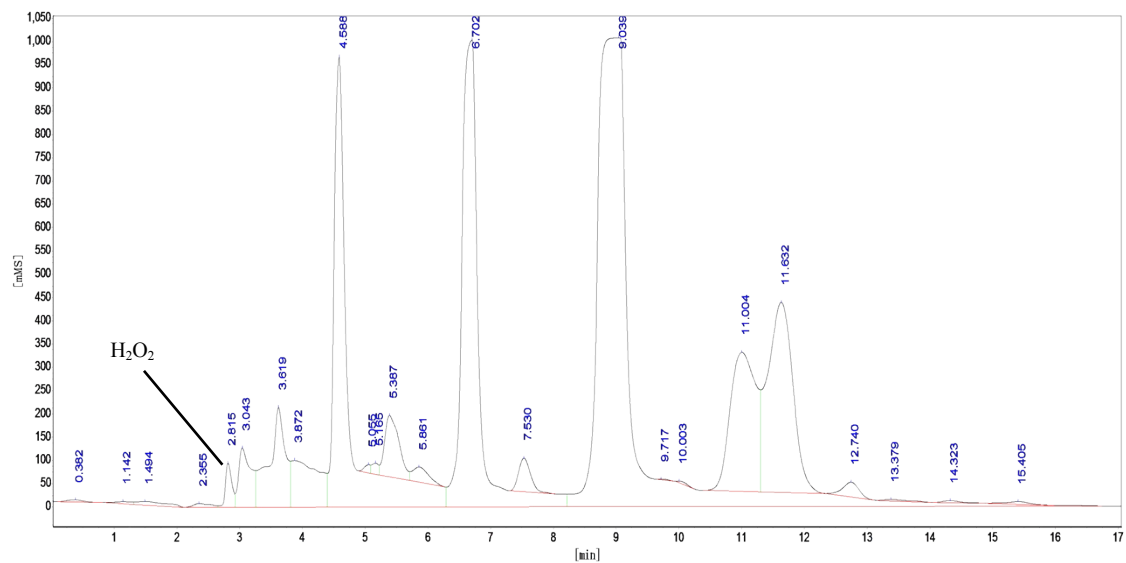

(b)

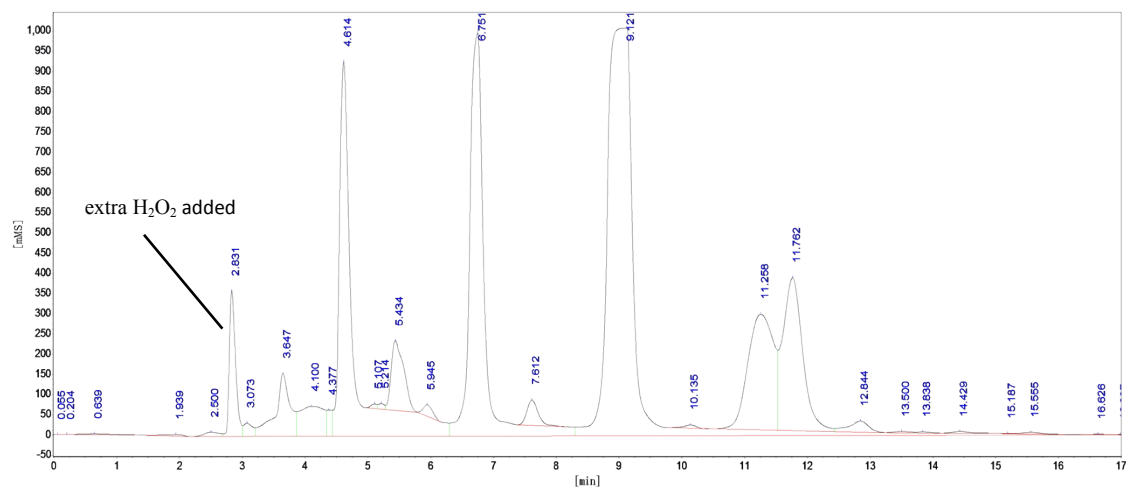

Figure S5. (a) HPLC graph of the reaction mixture between **1a** and **2a** in the presence of Pd(OAc)<sub>2</sub>/Sc(OTf)<sub>3</sub> in CH<sub>3</sub>CN; (b) the addition of extra H<sub>2</sub>O<sub>2</sub> into (a). In Figure S5(a), after compared with authentic H<sub>2</sub>O<sub>2</sub> sample, the peak at 2.851 min was attributed to H<sub>2</sub>O<sub>2</sub>. In Figure S5(b), after adding external H<sub>2</sub>O<sub>2</sub> to the reaction mixture, this peak increases clearly.



**Characterization data,  $^1\text{H}$  NMR and  $^{13}\text{C}$  NMR spectra of 3-vinylindoles and bis(indolyl) products**

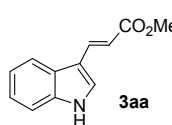

**(*E*)-methyl 3-(1*H*-indol-3-yl)acrylate (3aa):** Yield 6%;  $^1\text{H}$  NMR (400 MHz,  $\text{CDCl}_3$ )  $\delta$  8.96 (s, 1H), 7.92 (d,  $J = 16.0$  Hz, 1H), 7.88 (dd,  $J_1 = 6.7$  Hz,  $J_2 = 2.1$  Hz, 1H), 7.43 – 7.35 (m, 2H), 7.28 – 7.19 (m, 2H), 6.46 (d,  $J = 16.0$  Hz, 1H), 3.81 (s, 3H).  $^{13}\text{C}$  NMR (100 MHz,  $\text{CDCl}_3$ )  $\delta$  169.05, 138.81, 137.19, 129.26, 125.27, 123.29, 121.50, 120.37, 113.34, 112.61, 111.94, 51.50.

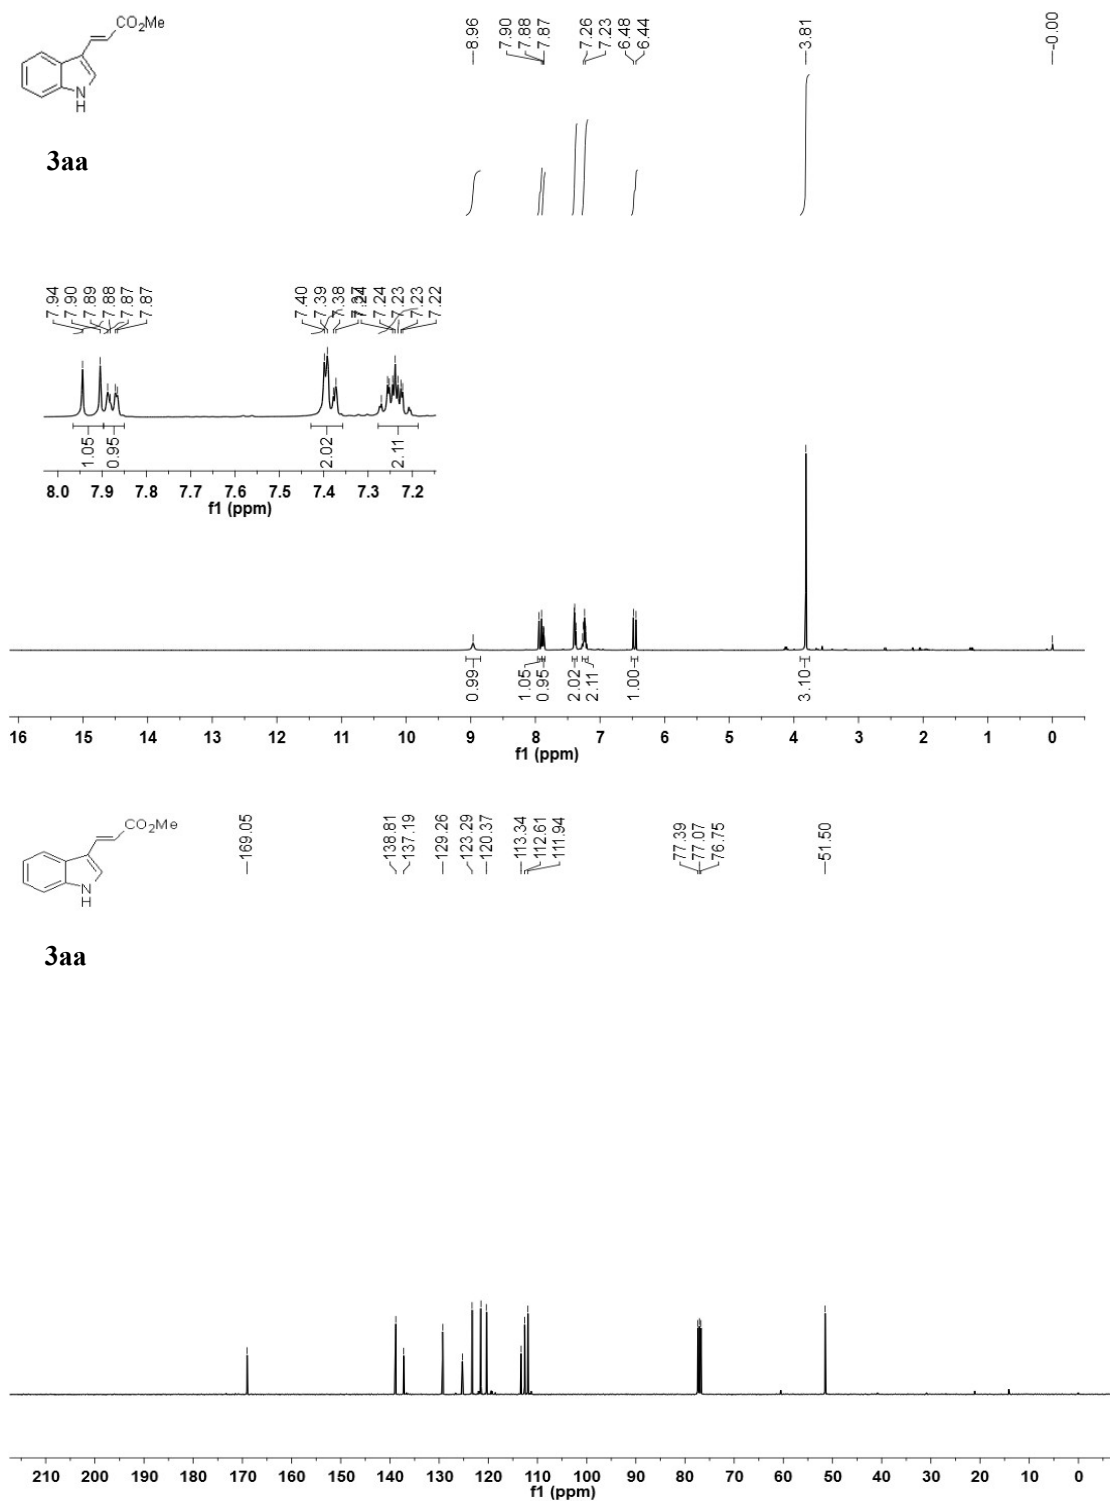

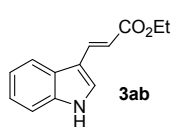

**(E)-ethyl 3-(1H-indol-3-yl)acrylate (3ab):** Yield 7%;  $^1\text{H}$  NMR (400 MHz,  $\text{CDCl}_3$ )  $\delta$  8.52 (s, 1H), 8.01 – 7.85 (m, 2H), 7.50 (d,  $J = 2.7$  Hz, 1H), 7.43 (dd,  $J = 6.8$  Hz,  $J_2 = 1.7$  Hz, 1H), 7.29 – 7.25 (m, 2H), 6.47 (d,  $J = 16.0$  Hz, 1H), 4.28 (q,  $J = 7.1$  Hz, 2H), 1.36 (t,  $J = 7.1$  Hz, 3H).  $^{13}\text{C}$  NMR (100 MHz,  $\text{CDCl}_3$ )  $\delta$  168.51, 138.39, 137.16, 128.96, 125.33, 123.32, 121.51, 120.49, 113.56, 113.36, 111.86, 60.22, 14.47.

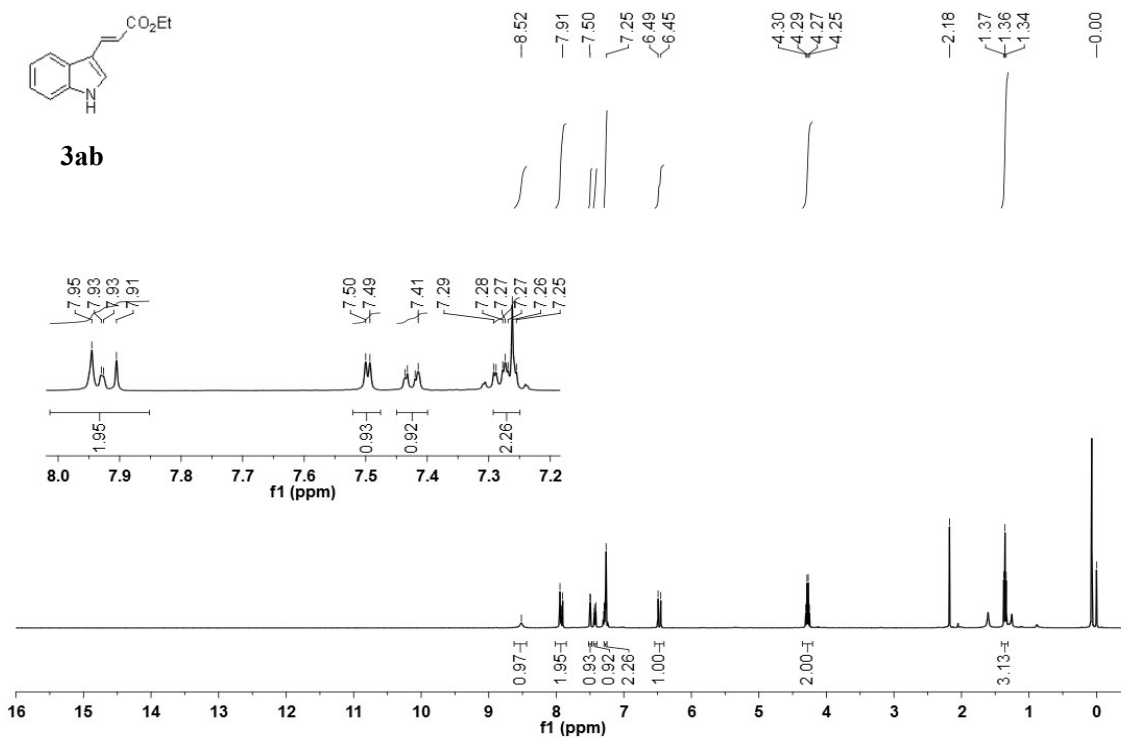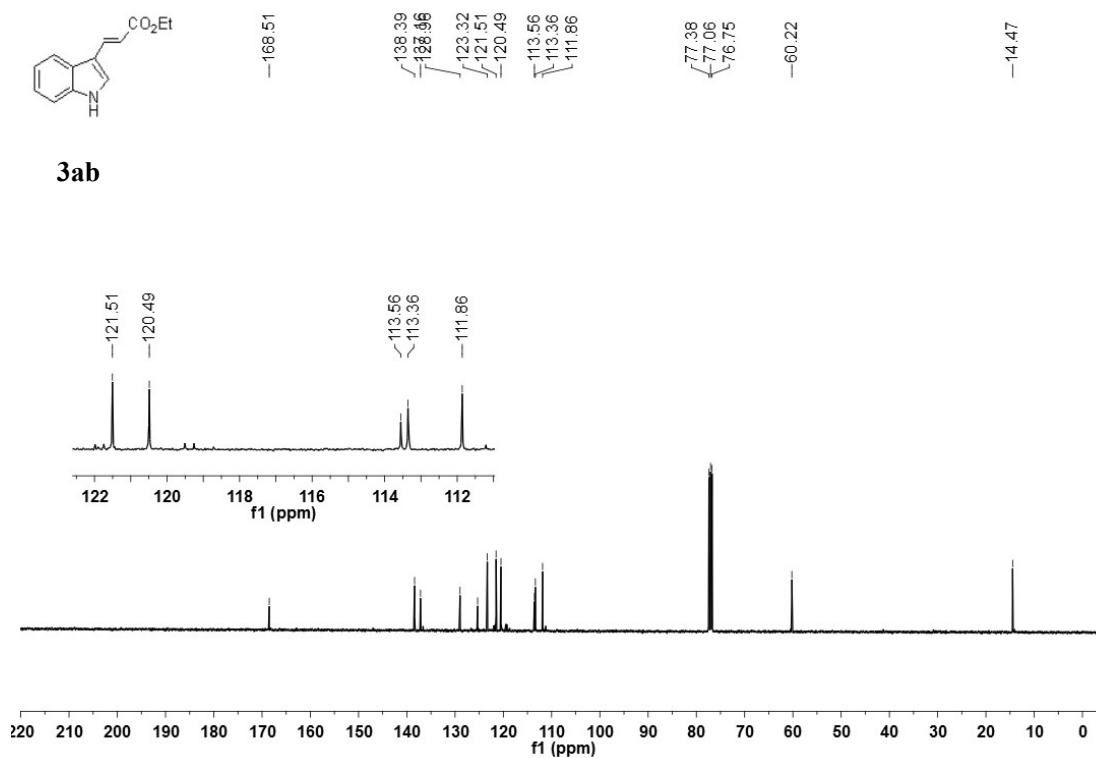

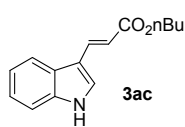

**(E)-butyl 3-(1H-indol-3-yl)acrylate (3ac):** Yield 5%;  $^1\text{H NMR}$  (400 MHz,  $\text{CDCl}_3$ )

$\delta$  8.93 (s, 1H), 8.02 – 7.84 (m, 2H), 7.43 – 7.35 (m, 2H), 7.28 – 7.19 (m, 2H), 6.47 (d,  $J = 16.0$  Hz, 1H), 4.23 (t,  $J = 6.7$  Hz, 2H), 1.71 (q,  $J = 6.7$  Hz, 2H), 1.52 – 1.39 (m, 2H), 0.97 (t,  $J = 7.4$  Hz, 3H).  $^{13}\text{C NMR}$  (100 MHz,  $\text{CDCl}_3$ )  $\delta$  168.80, 138.56, 137.23, 129.24, 125.32, 123.30, 121.49, 120.46, 113.43, 113.15, 111.96, 64.25, 30.94, 19.30, 13.83.

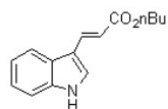

**3ac**

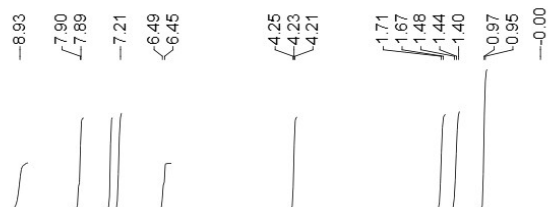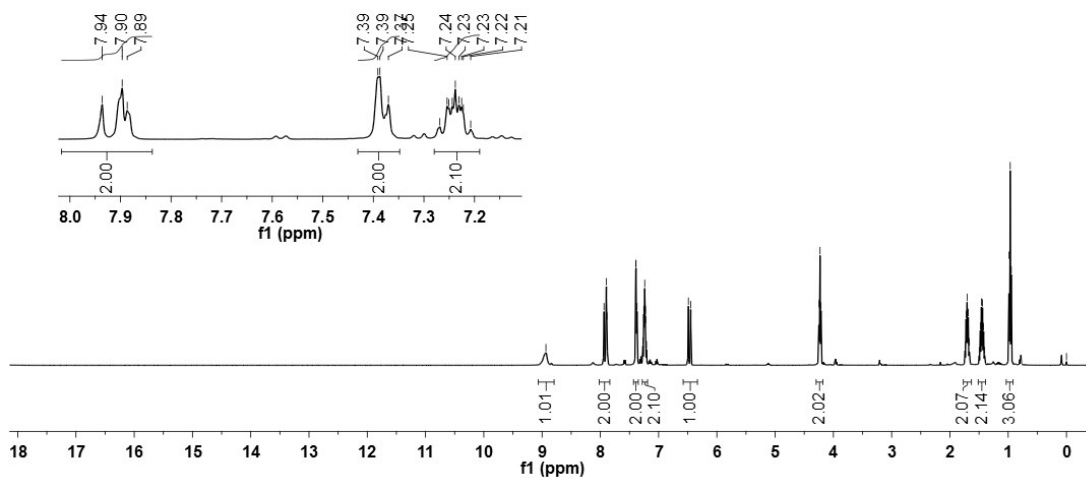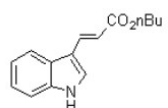

**3ac**

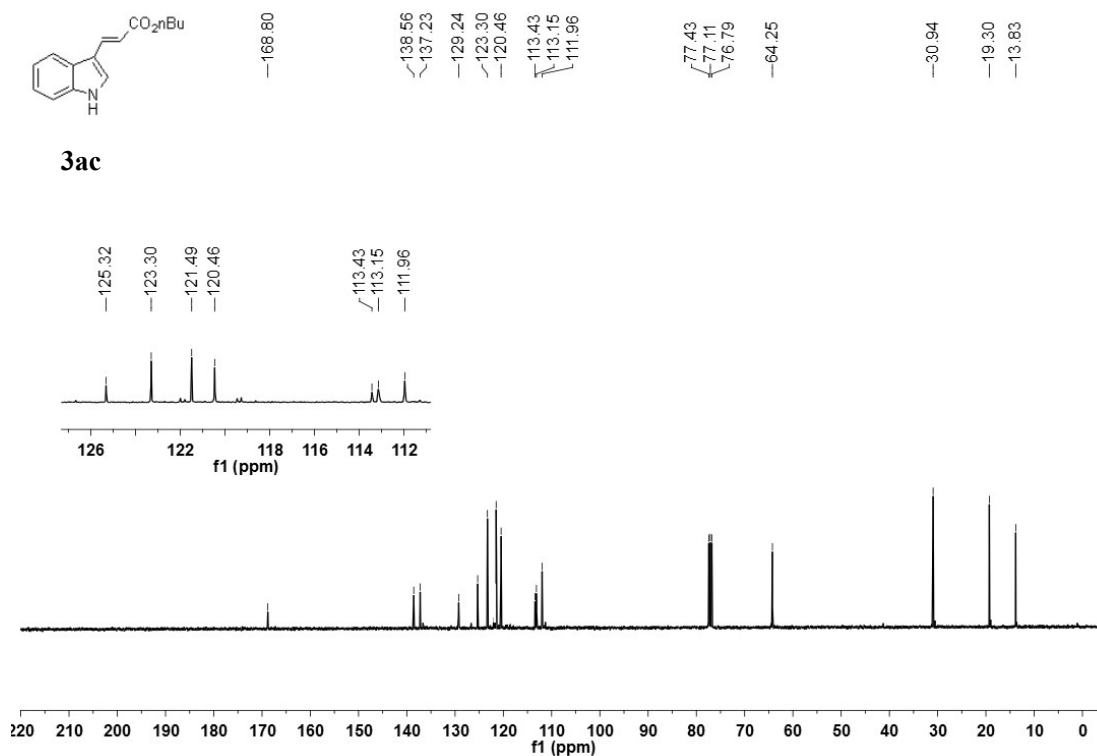

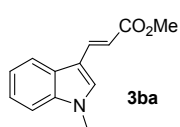

**(E)-methyl 3-(1-methyl-1H-indol-3-yl)acrylate (3ba):** Yield 21%;  $^1\text{H}$  NMR (400 MHz,  $\text{CDCl}_3$ )  $\delta$  7.90 – 7.78 (m, 2H), 7.26 – 7.12 (m, 4H), 6.37 (d,  $J$  = 15.9 Hz, 1H), 3.78 (s, 3H), 3.61 (s, 3H).  $^{13}\text{C}$  NMR (100 MHz,  $\text{CDCl}_3$ )  $\delta$  168.77, 138.32, 138.09, 133.34, 126.04, 122.97, 121.33, 120.48, 111.99, 111.93, 110.05, 51.37, 33.03.

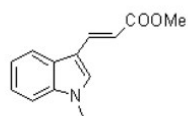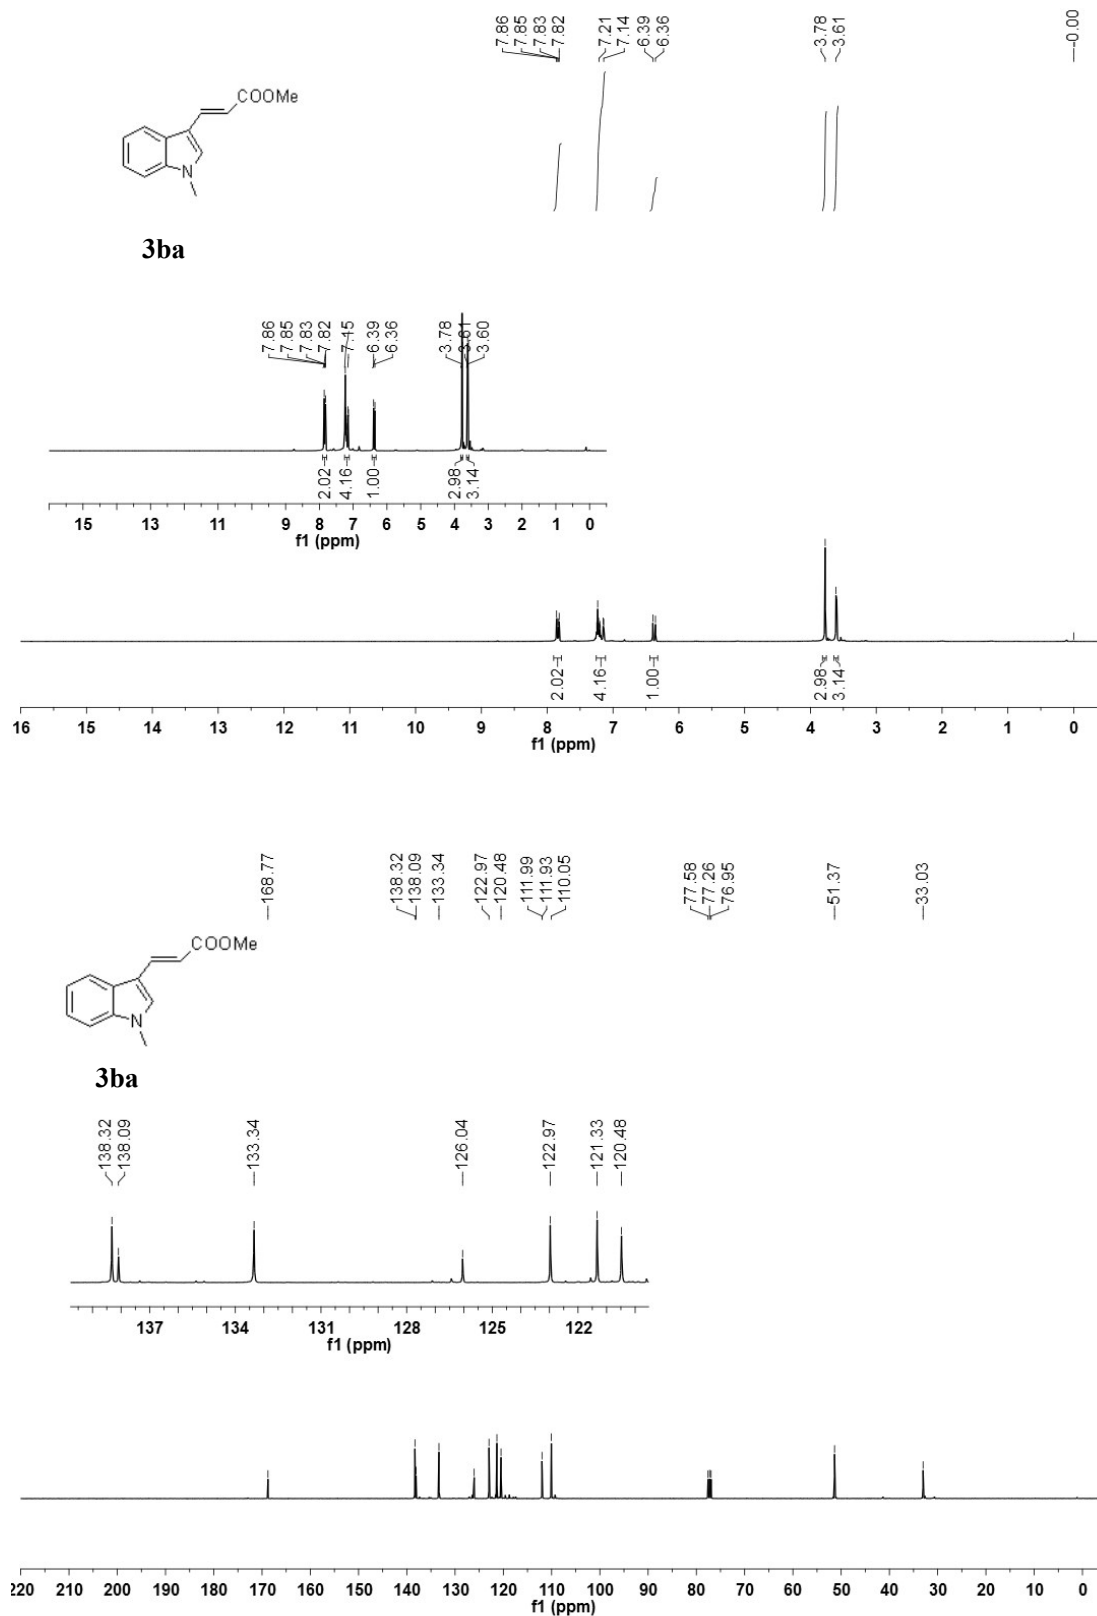

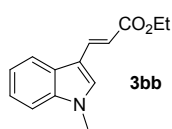

**(E)-ethyl 3-(1-methyl-1H-indol-3-yl)acrylate (3bb):** Yield 17%;  $^1\text{H}$  NMR (400 MHz,  $\text{CDCl}_3$ )  $\delta$  8.00 – 7.72 (t,  $J = 11.9$  Hz, 2H), 7.36 – 7.20 (m, 4H), 6.40 (d,  $J = 15.9$  Hz, 1H), 4.26 (q,  $J = 7.1$  Hz, 2H), 3.74 (s, 3H), 1.34 (t,  $J = 7.1$  Hz, 3H).  $^{13}\text{C}$  NMR (100 MHz,  $\text{CDCl}_3$ )  $\delta$  168.37, 138.08, 138.00, 133.15, 126.05, 122.95, 121.27, 120.59, 112.59, 112.08, 109.97, 60.04, 33.13, 14.50.

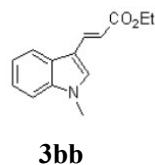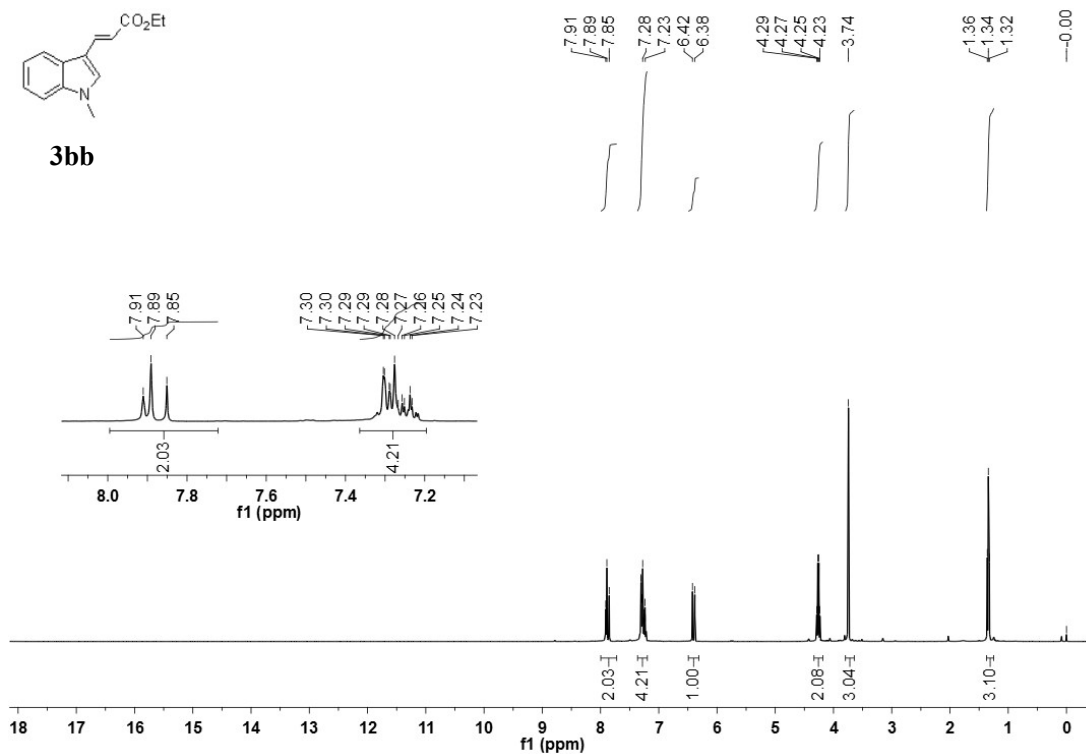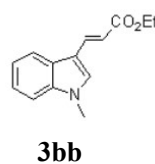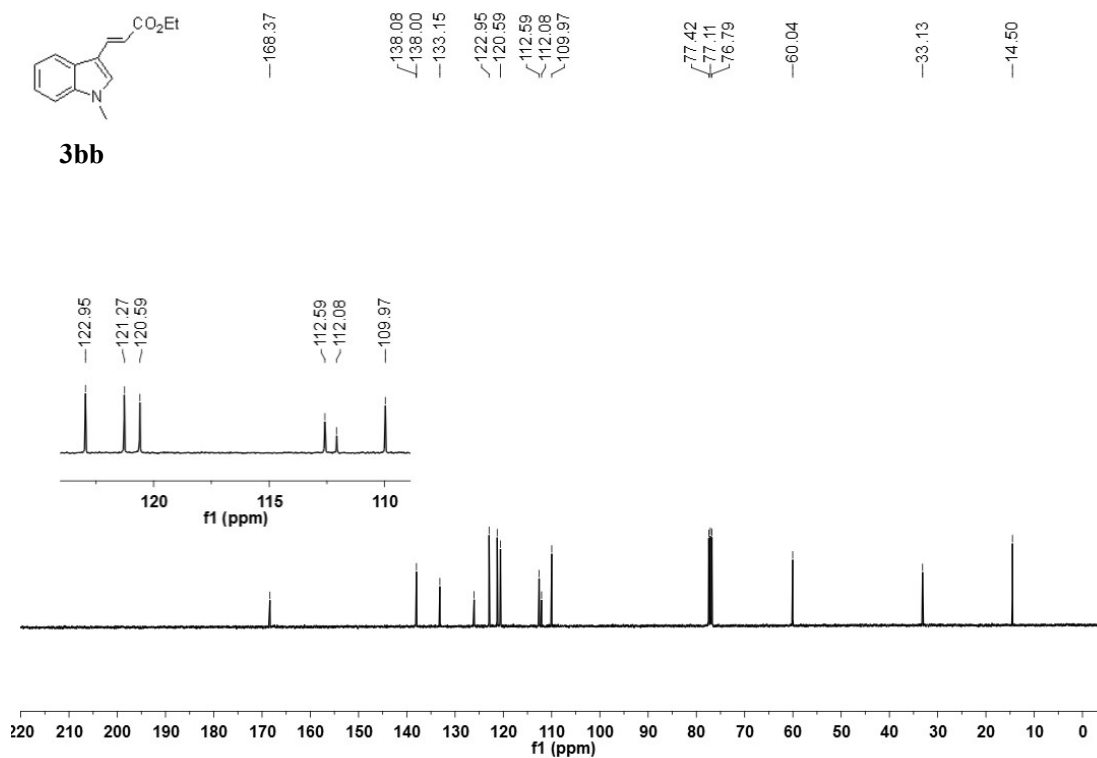

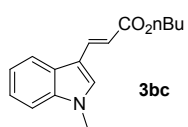

**(E)-butyl 3-(1-methyl-1H-indol-3-yl)acrylate (3bc):** Yield 21%;  $^1\text{H NMR}$  (400 MHz,  $\text{CDCl}_3$ )  $\delta$  7.94 – 7.83 (m, 2H), 7.34 – 7.22 (m, 4H), 6.41 (d,  $J = 15.9$  Hz, 1H), 4.21 (t,  $J = 6.7$  Hz, 2H), 3.78 (s, 3H), 1.70 (q,  $J = 6.8$  Hz, 2H), 1.51 – 1.38 (m, 2H), 0.97 (t,  $J = 7.4$  Hz, 3H).  $^{13}\text{C NMR}$  (100 MHz,  $\text{CDCl}_3$ )  $\delta$  168.47, 138.08, 137.94, 133.10, 126.06, 122.95, 121.26, 120.62, 112.64, 112.11, 109.95, 64.00, 33.14, 30.97, 19.29, 13.82.

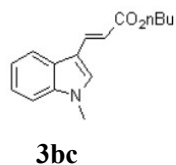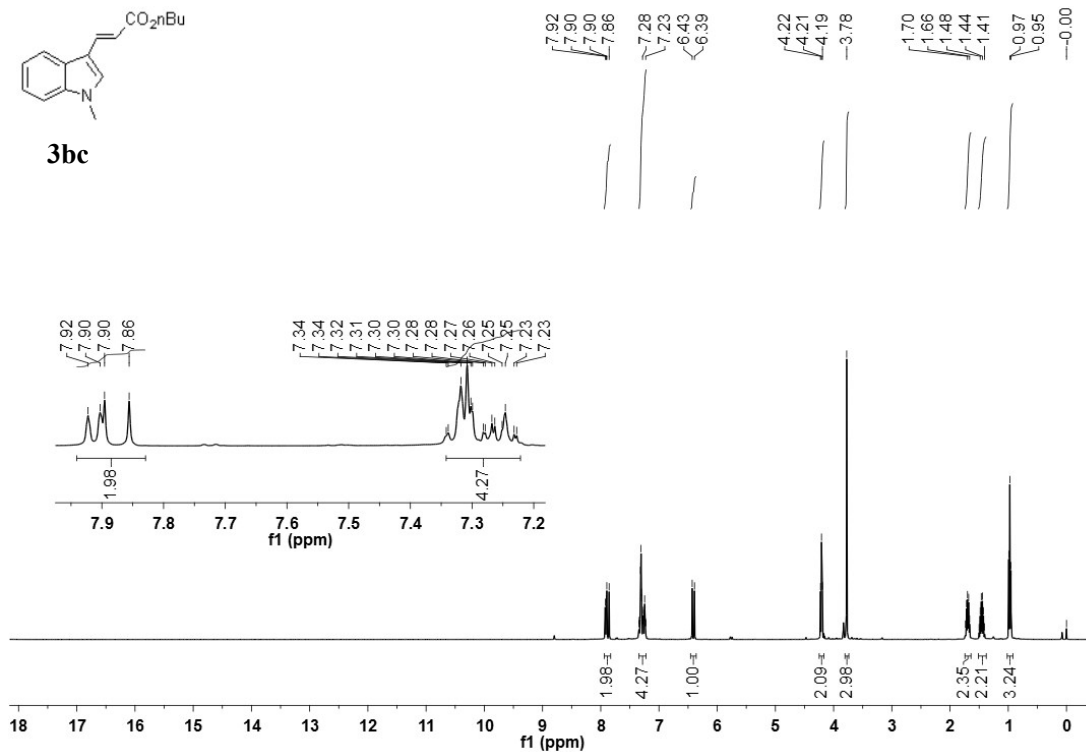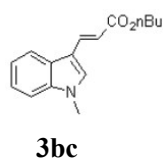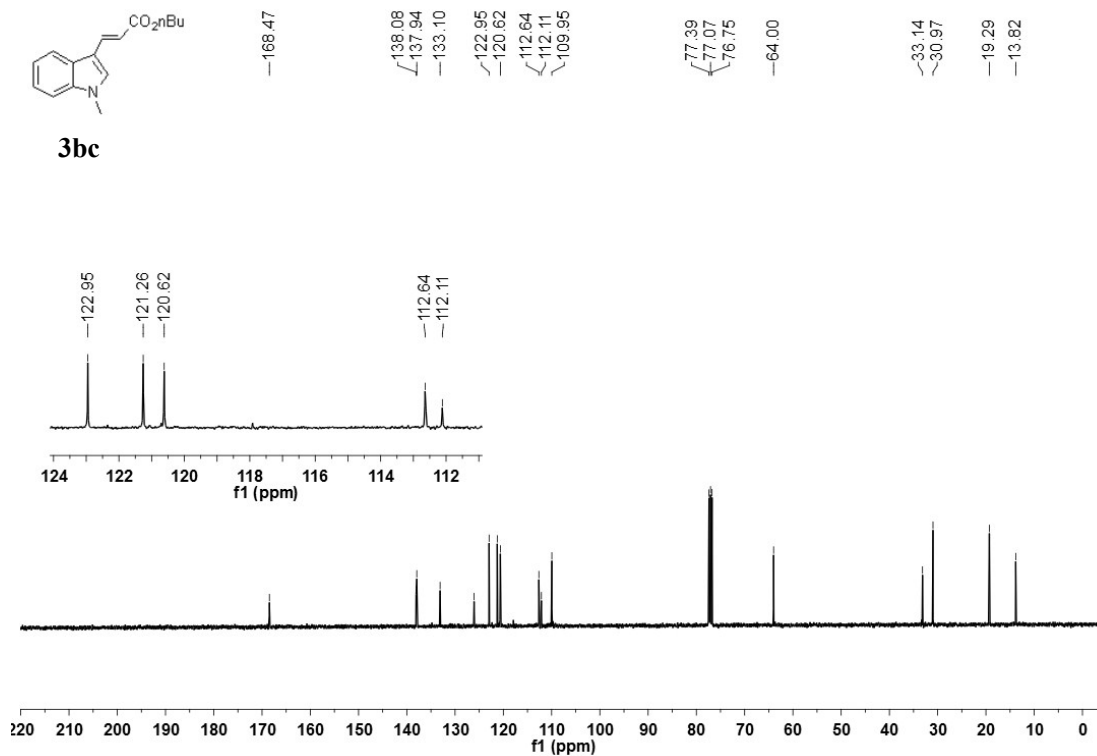

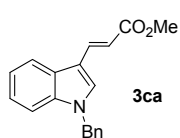

**(E)-methyl 3-(1-benzyl-1H-indol-3-yl)acrylate (3ca):** Yield 16%;  $^1\text{H}$  NMR (400 MHz,  $\text{CDCl}_3$ )  $\delta$  7.97 – 7.81 (m, 2H), 7.39 (s, 1H), 7.36 – 7.27 (m, 4H), 7.28 – 7.21 (m, 2H), 7.16 – 7.07 (m, 2H), 6.43 (d,  $J$  = 16.0 Hz, 1H), 5.30 (s, 2H), 3.80 (s, 3H).  $^{13}\text{C}$  NMR (100 MHz,  $\text{CDCl}_3$ )  $\delta$  168.65, 138.15, 137.67, 136.17, 132.44, 128.99, 128.09, 126.99, 126.33, 123.16, 121.50, 120.67, 112.63, 110.50, 51.39, 50.44.

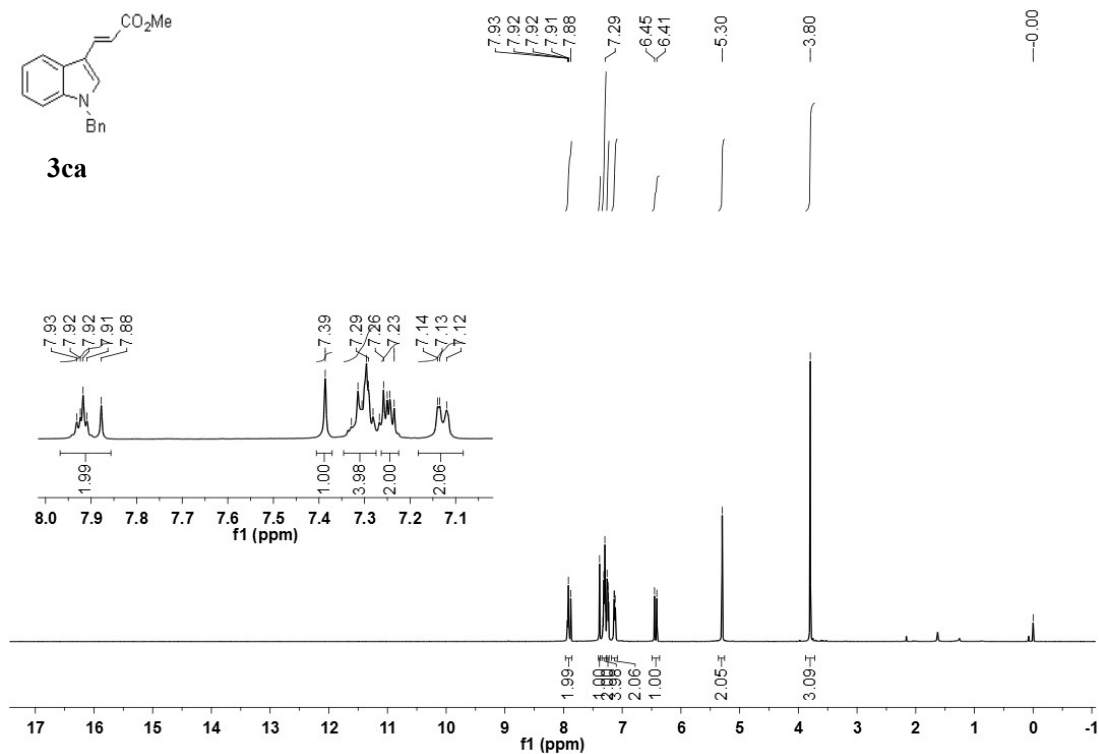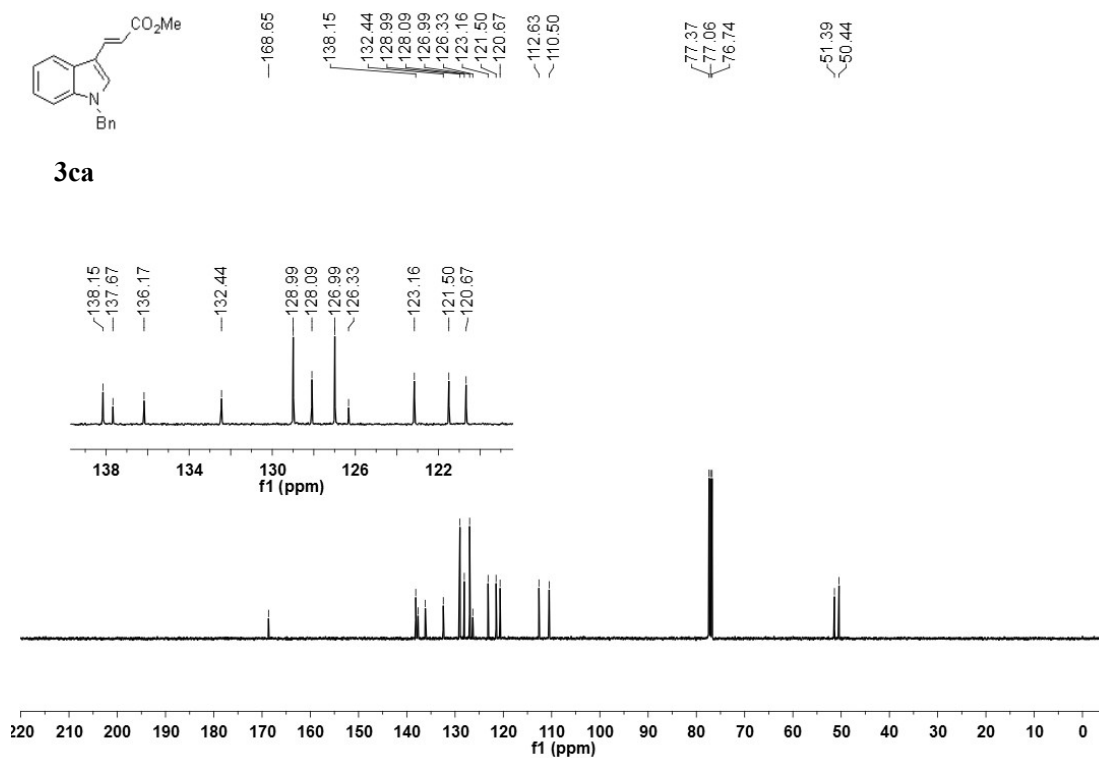

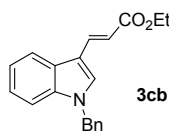

**(E)-ethyl 3-(1-benzyl-1H-indol-3-yl)acrylate (3cb):** Yield 21%;  $^1\text{H NMR}$  (400 MHz,  $\text{CDCl}_3$ )  $\delta$  7.99 – 7.83 (m, 2H), 7.37 (s, 1H), 7.33 – 7.27 (m, 4H), 7.26 – 7.22 (m, 2H), 7.18 – 7.04 (m, 2H), 6.43 (d,  $J = 16.0$  Hz, 1H), 5.28 (s, 2H), 4.26 (d,  $J = 7.1$  Hz, 2H), 1.34 (t,  $J = 7.1$  Hz, 3H).  $^{13}\text{C NMR}$  (100 MHz,  $\text{CDCl}_3$ )  $\delta$  168.23, 137.88, 137.67, 136.20, 132.38, 128.98, 128.08, 127.00, 126.34, 123.13, 121.46, 120.72, 113.13, 112.69, 110.48, 60.06, 50.42, 14.49.

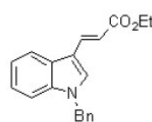

**3cb**

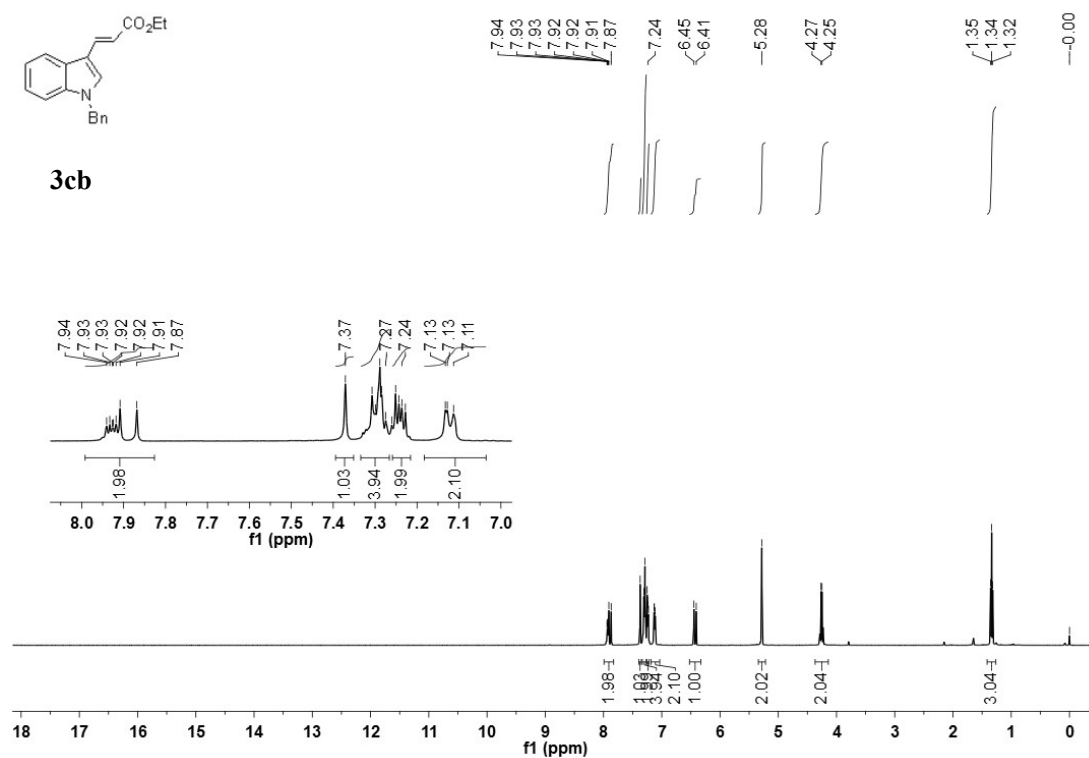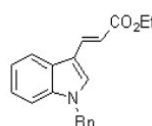

**3cb**

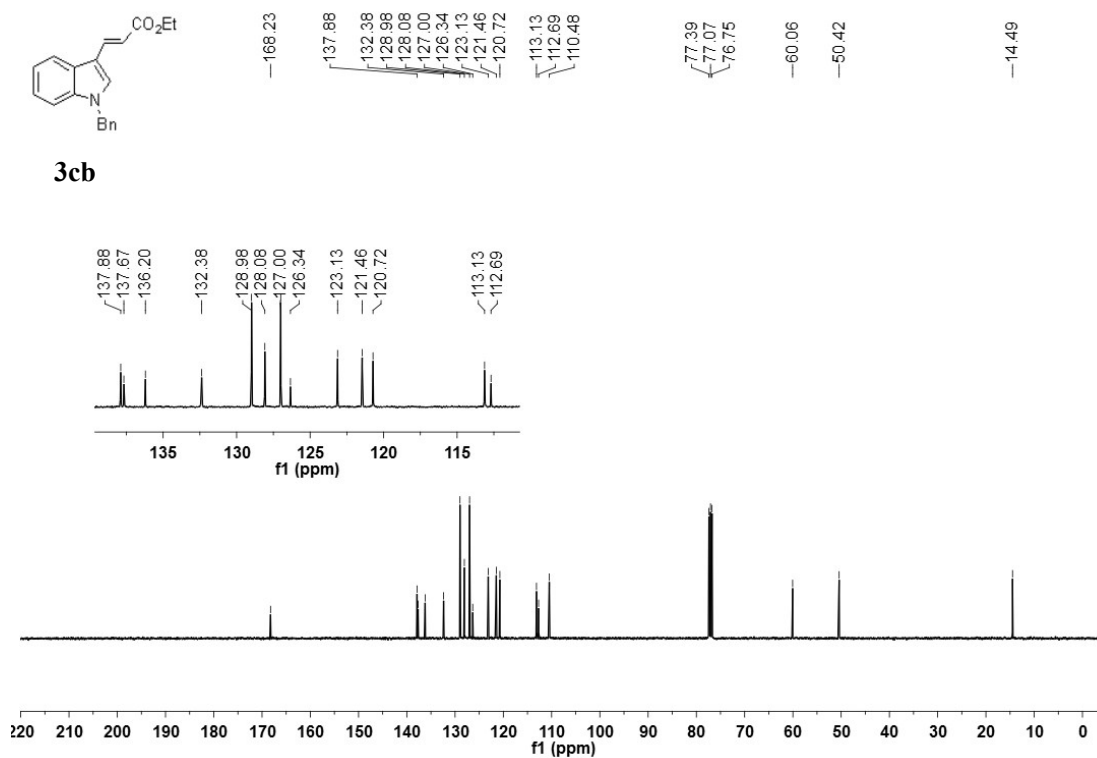



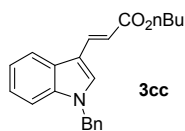

**(E)-butyl 3-(1-benzyl-1H-indol-3-yl)acrylate (3cc):** Yield 24%;  $^1\text{H}$  NMR (400 MHz,  $\text{CDCl}_3$ )  $\delta$  7.99 – 7.83 (m, 2H), 7.37 (s, 1H), 7.33 – 7.27 (m, 4H), 7.26 – 7.22 (m, 2H), 7.18 – 7.06 (m, 2H), 6.43 (d,  $J = 16.0$  Hz, 1H), 5.28 (s, 2H), 4.20 (t,  $J = 6.7$  Hz, 2H), 1.69 (q,  $J = 6.8$  Hz, 2H), 1.52 – 1.38 (m, 2H), 0.97 (t,  $J = 7.4$  Hz, 3H).

$^{13}\text{C}$  NMR (100 MHz,  $\text{CDCl}_3$ )  $\delta$  168.34, 137.84, 137.67, 136.22, 132.36, 128.98, 128.08, 127.00, 126.34, 123.13, 121.45, 120.72, 113.15, 112.70, 110.48, 64.02, 50.42, 30.97, 19.29, 13.83. HRMS (ESI)

$m/z$ : calculated for  $\text{C}_{22}\text{H}_{23}\text{NO}_2\text{Na}$   $[\text{M}+\text{Na}]^+$ : 356.1626, found 356.1641.

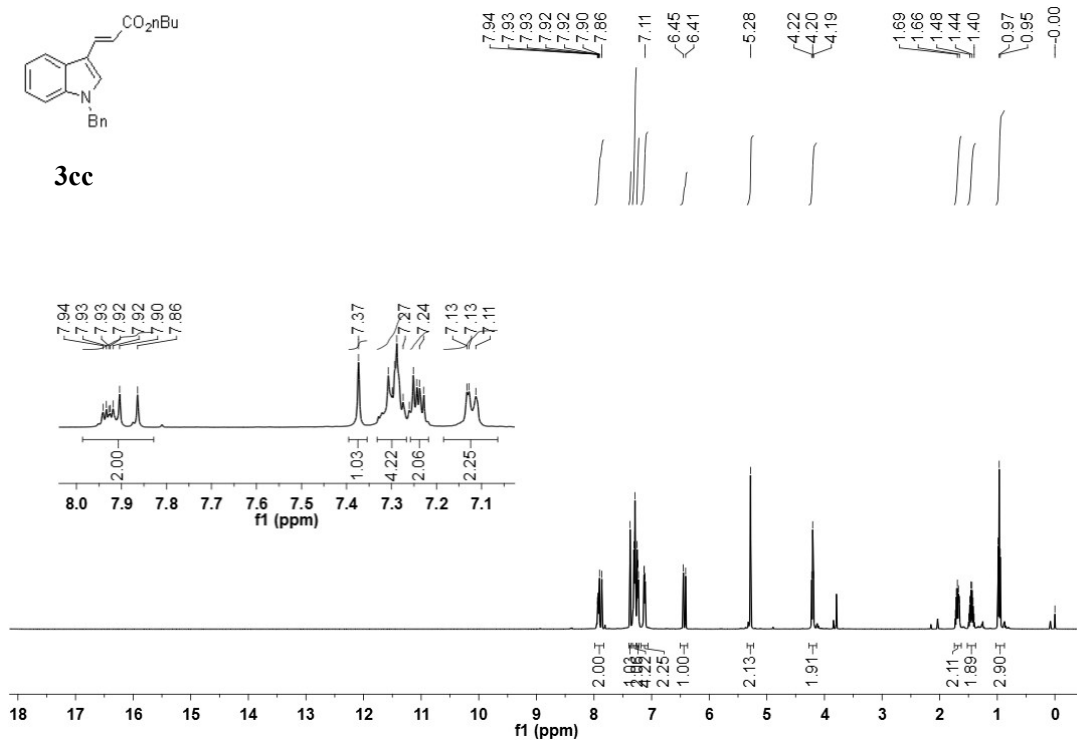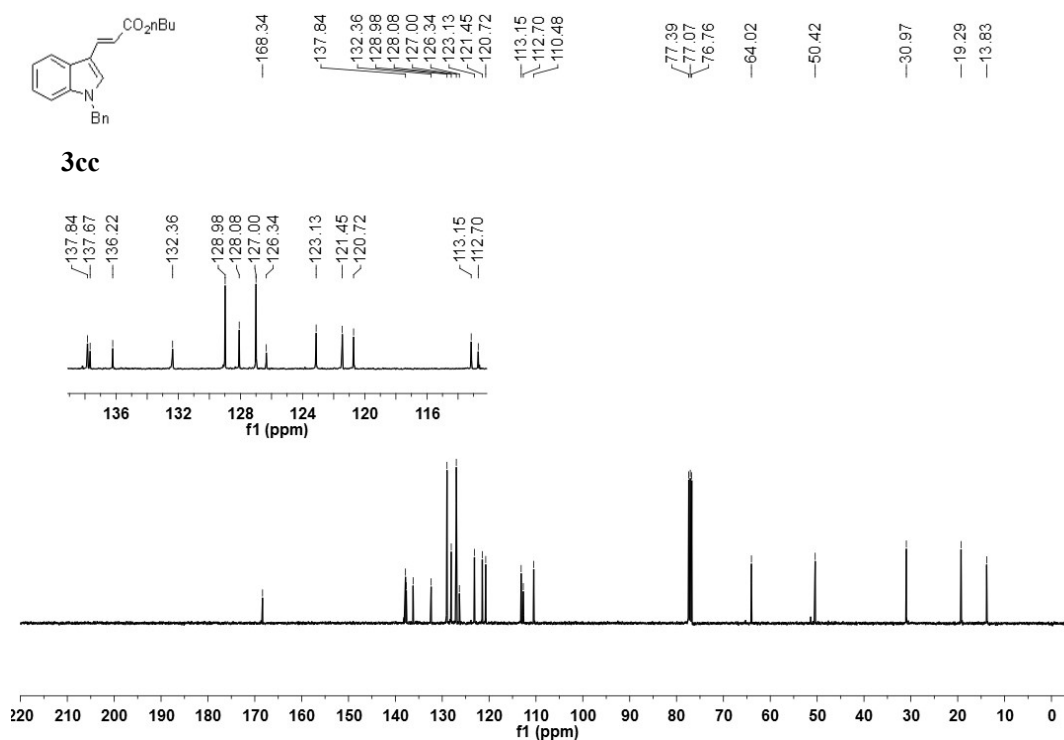

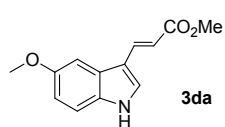

**3da**

**(E)-methyl 3-(5-methoxy-1H-indol-3-yl)acrylate (3da):** Yield 15%;  $^1\text{H}$  NMR (400 MHz,  $\text{CDCl}_3$ )  $\delta$  8.95 (brs, 1H), 7.92 (d,  $J = 16.0$  Hz, 1H), 7.42 (d,  $J = 2.8$  Hz, 1H), 7.31 – 7.25 (m, 2H), 6.91 (dd,  $J_1 = 8.8$  Hz,  $J_2 = 2.4$  Hz, 1H), 6.37 (d,  $J = 16.0$  Hz, 1H), 3.86 (s, 3H), 3.82 (s, 3H).  $^{13}\text{C}$  NMR (100 MHz,  $\text{CDCl}_3$ )  $\delta$  169.08, 155.46, 138.88, 132.14, 129.59, 125.96, 113.31, 113.15, 112.66, 111.98, 102.41, 55.95, 51.52.

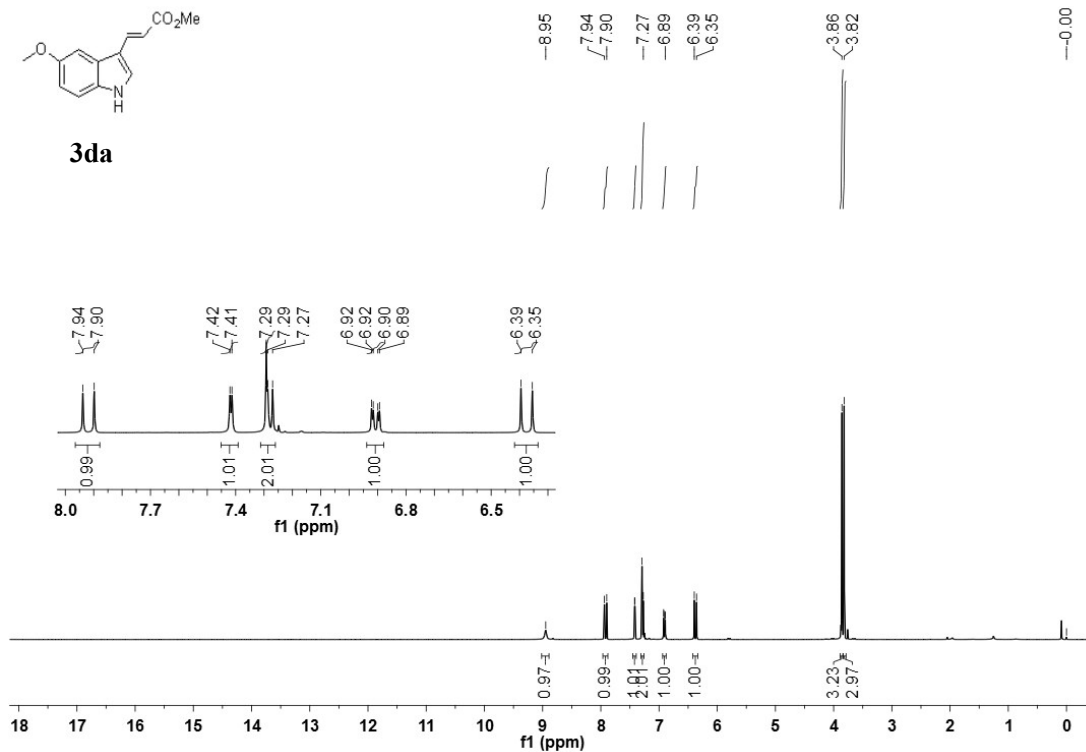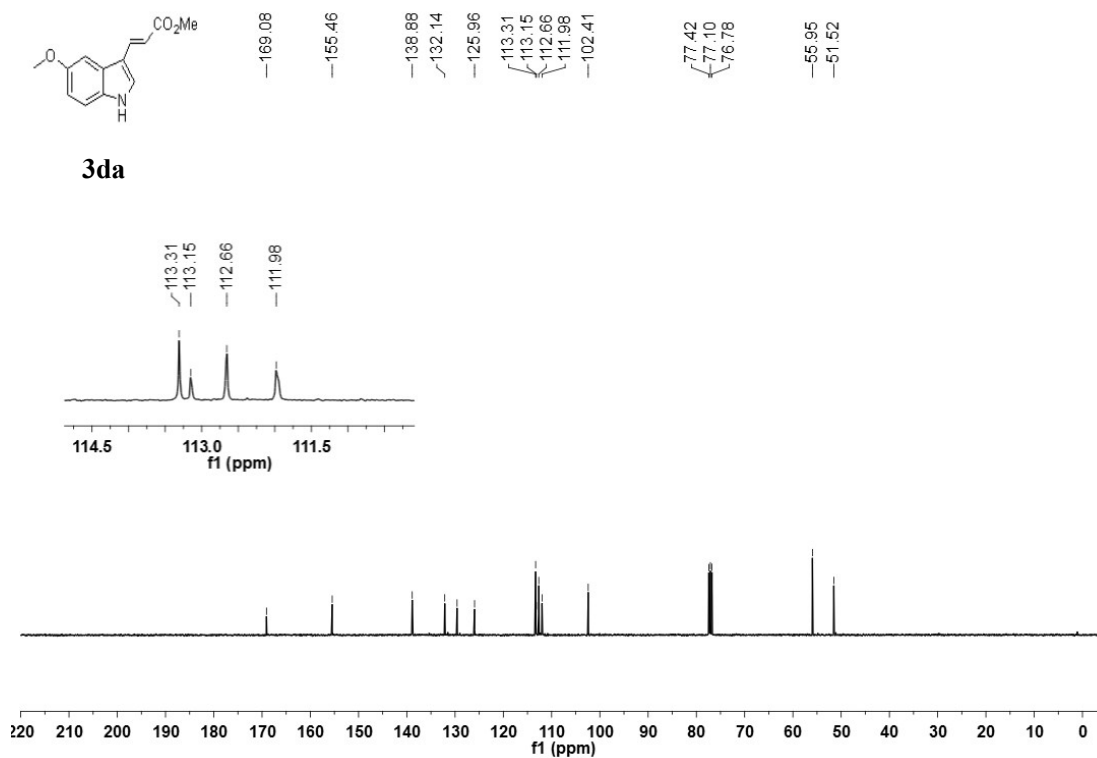

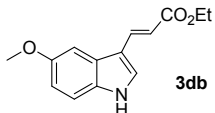
**(E)-ethyl 3-(5-methoxy-1H-indol-3-yl)acrylate (3db):** Yield 10%; <sup>1</sup>H NMR (400 MHz, CDCl<sub>3</sub>) δ 8.89 (brs, 1H), 7.91 (d, *J* = 16.0 Hz, 1H), 7.42 (d, *J* = 2.8 Hz, 1H), 7.30 (d, *J* = 2.3 Hz, 1H), 7.28 (d, *J* = 8.8 Hz, 1H), 6.91 (dd, *J*<sub>1</sub> = 8.8, *J*<sub>2</sub> = 2.4 Hz, 1H), 6.37 (d, *J* = 16.0 Hz, 1H), 4.29 (q, *J* = 7.1 Hz, 2H), 3.87 (s, 3H), 1.36 (t, *J* = 7.1 Hz, 3H). <sup>13</sup>C NMR (100 MHz, CDCl<sub>3</sub>) δ 168.65, 155.44, 138.57, 132.13, 129.97, 125.97, 113.26, 113.22, 112.61, 112.52, 102.49, 60.25, 55.99, 14.48.

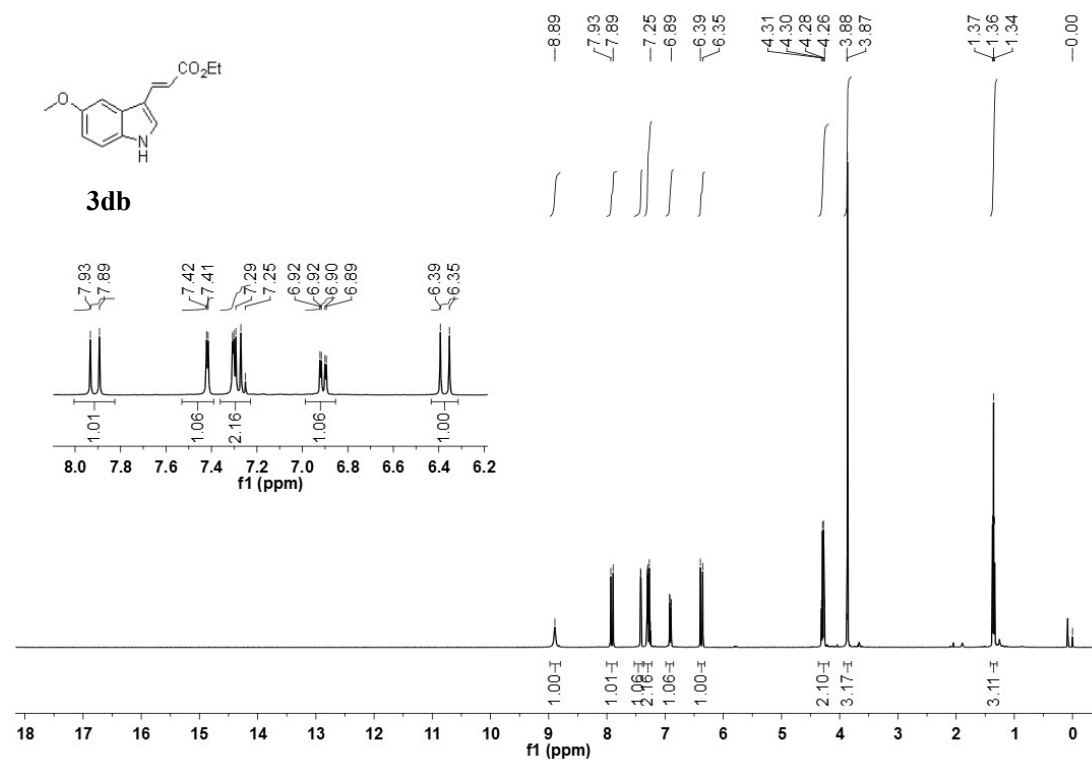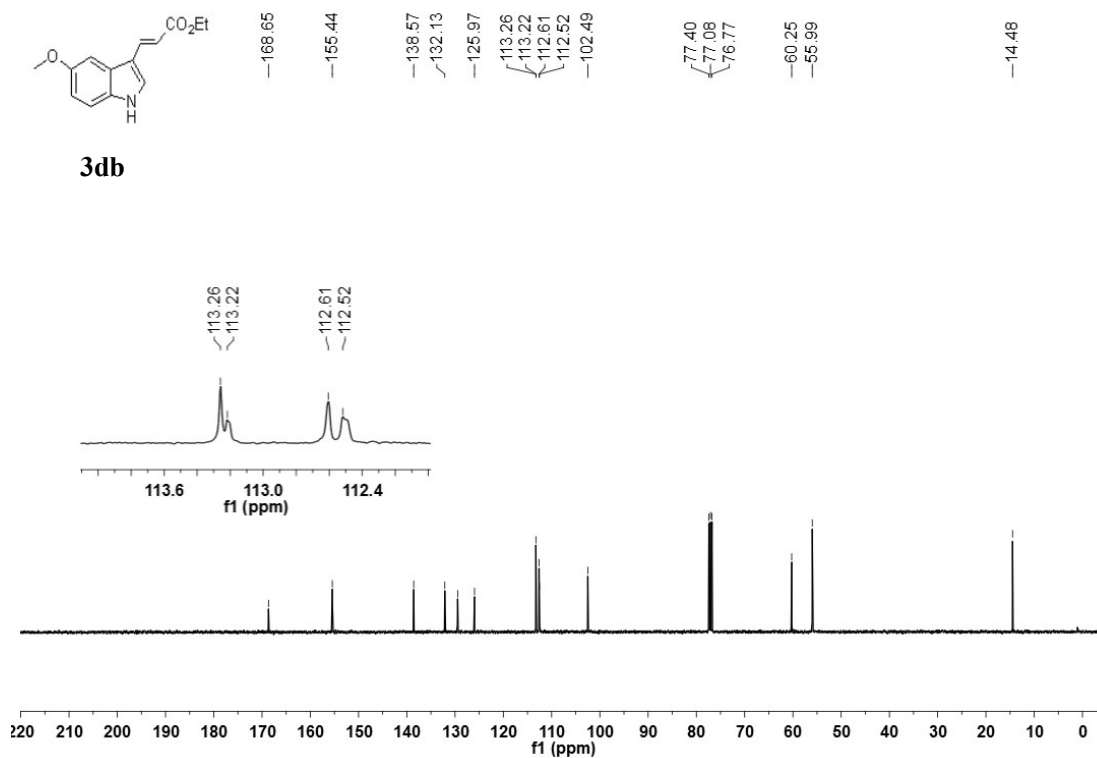

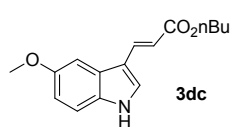

**3dc**

**(E)-butyl 3-(5-methoxy-1H-indol-3-yl)acrylate (3dc):** Yield 13%;  $^1\text{H NMR}$  (400 MHz,  $\text{CDCl}_3$ )  $\delta$  8.59 (brs, 1H), 7.90 (d,  $J = 16.0$  Hz, 1H), 7.43 (d,  $J = 2.8$  Hz, 1H), 7.32 (d,  $J = 2.3$  Hz, 1H), 7.28 (d,  $J = 8.8$  Hz, 1H), 6.92 (dd,  $J_1 = 8.8$  Hz,  $J_2 = 2.4$  Hz, 1H), 6.37 (d,  $J = 16.0$  Hz, 1H), 4.23 (t,  $J = 6.7$  Hz, 2H), 3.89 (s, 3H), 1.70 (q,  $J = 6.9$  Hz, 2H), 1.52 – 1.39 (m, 2H), 0.98 (t,  $J = 7.4$  Hz, 3H).  $^{13}\text{C NMR}$  (100 MHz,  $\text{CDCl}_3$ )  $\delta$  168.53, 155.46, 138.30, 132.02, 129.16, 126.00, 113.35, 113.25, 112.79, 112.47, 102.57, 64.13, 56.01, 30.95, 19.27, 13.80.

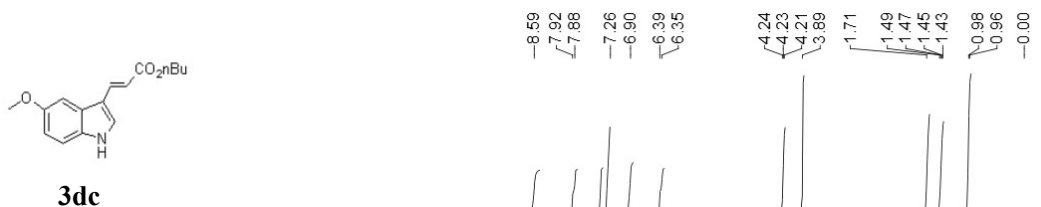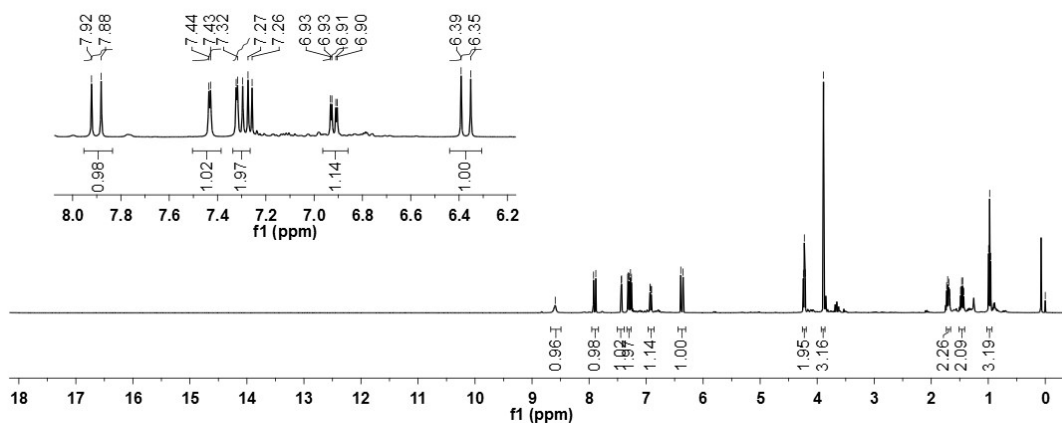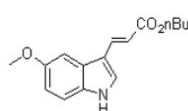

**3dc**

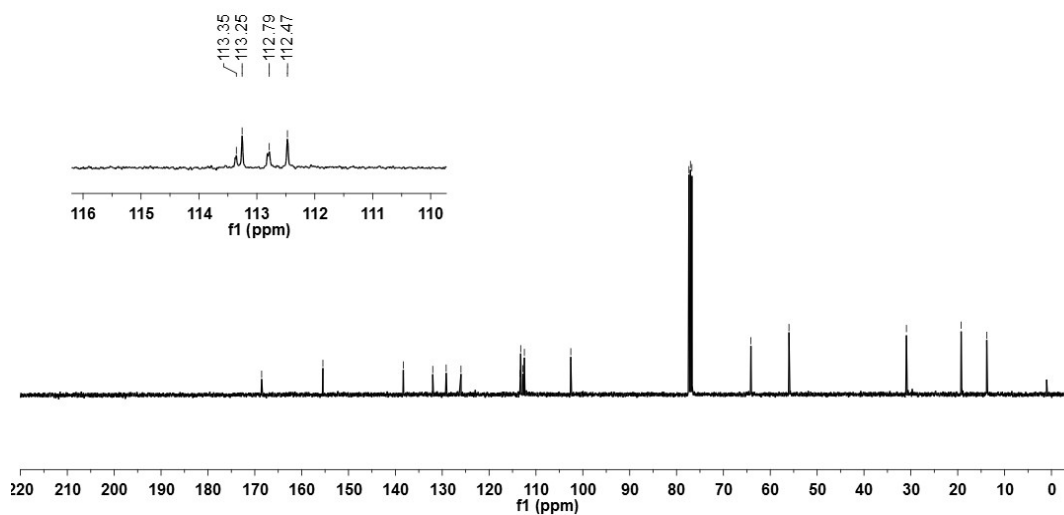

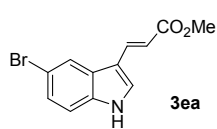

**(E)-methyl 3-(5-bromo-1H-indol-3-yl)acrylate (3ea):** Yield 10%;  $^1\text{H NMR}$  (400 MHz,  $\text{CDCl}_3$ )  $\delta$  8.67 (brs, 1H), 8.03 (s, 1H), 7.86 (d,  $J = 16.0$  Hz, 1H), 7.47 (d,  $J = 2.7$  Hz, 1H), 7.36 (dd,  $J_1 = 8.6$  Hz,  $J_2 = 1.7$  Hz, 1H), 7.29 (d,  $J = 8.6$  Hz, 1H), 6.41 (d,  $J = 16.0$  Hz, 1H), 3.82 (s, 3H).  $^{13}\text{C NMR}$  (100 MHz,  $\text{CDCl}_3$ )  $\delta$  168.49, 137.67, 135.67, 129.44, 126.97, 126.32, 123.11, 114.95, 113.73, 113.16, 113.16, 51.56.

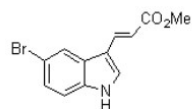

**3ea**

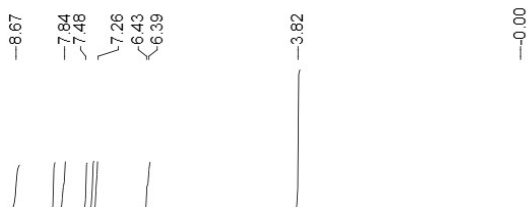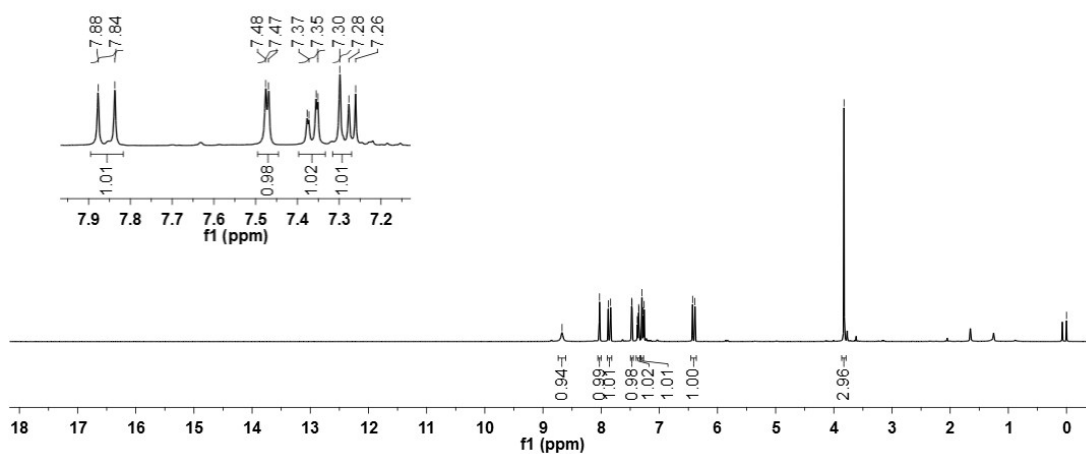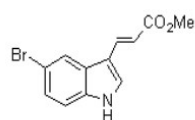

**3ea**

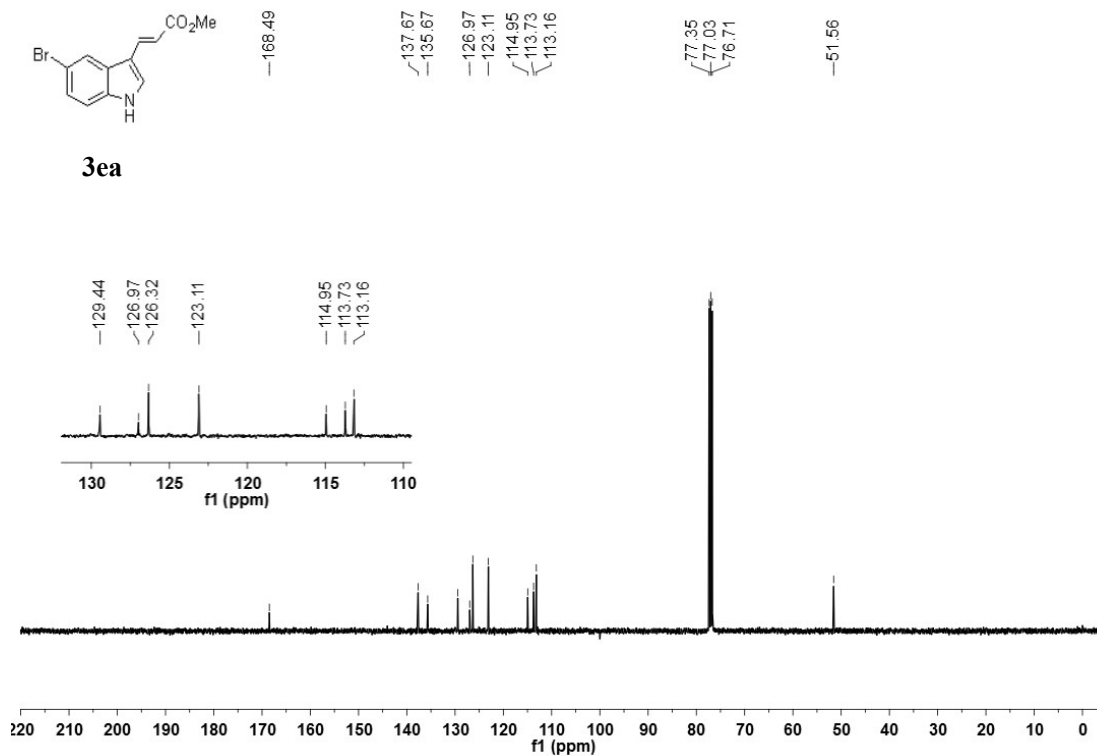

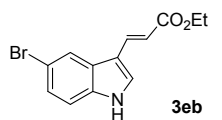

**3eb**

**(E)-ethyl 3-(5-bromo-1H-indol-3-yl)acrylate (3eb):** Yield 15%;  $^1\text{H}$  NMR (400 MHz,  $\text{CDCl}_3$ )  $\delta$  8.86 (s, 1H), 8.04 (d,  $J = 1.4$  Hz, 1H), 7.85 (d,  $J = 16.0$  Hz, 1H), 7.47 (s, 1H), 7.36 (dd,  $J_1 = 8.6$  Hz,  $J_2 = 1.6$  Hz, 1H), 7.29 (d,  $J = 8.6$  Hz, 1H), 6.40 (d,  $J = 16.0$  Hz, 1H), 4.28 (q,  $J = 7.1$  Hz, 2H), 1.36 (t,  $J = 7.1$  Hz, 3H).  $^{13}\text{C}$  NMR (100 MHz,  $\text{CDCl}_3$ )  $\delta$  167.07, 136.43, 134.70, 128.48, 125.95, 125.22, 122.08, 113.84, 113.08, 112.17, 112.15, 59.27, 13.41.

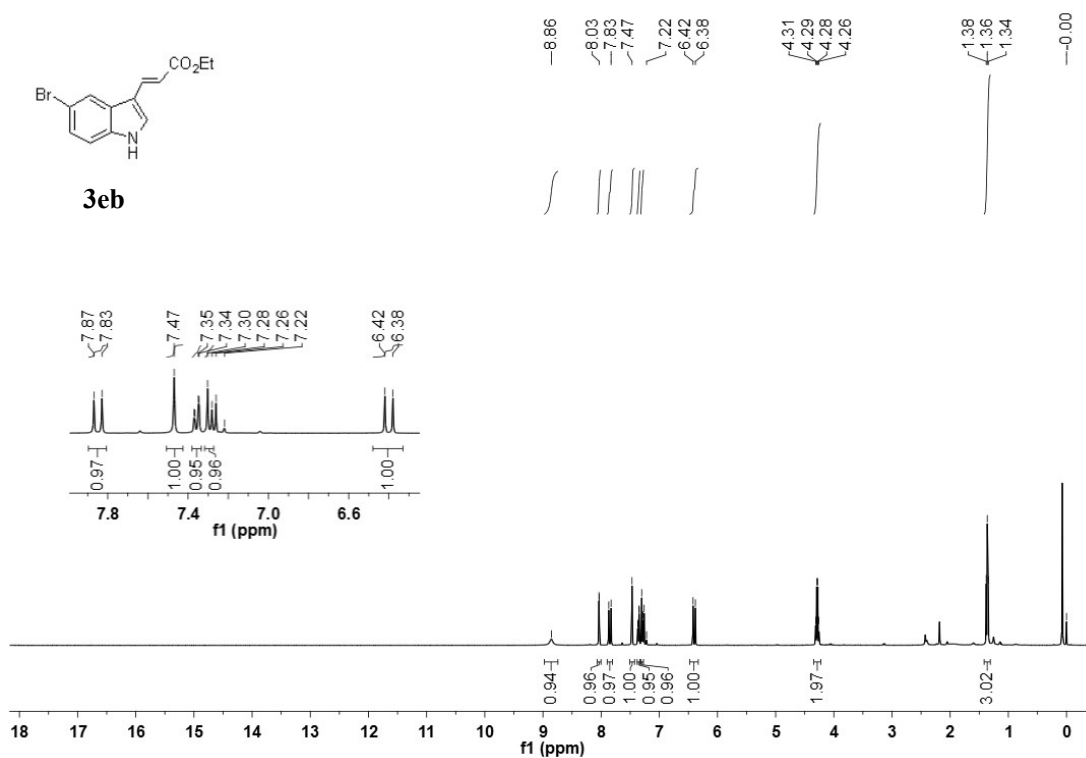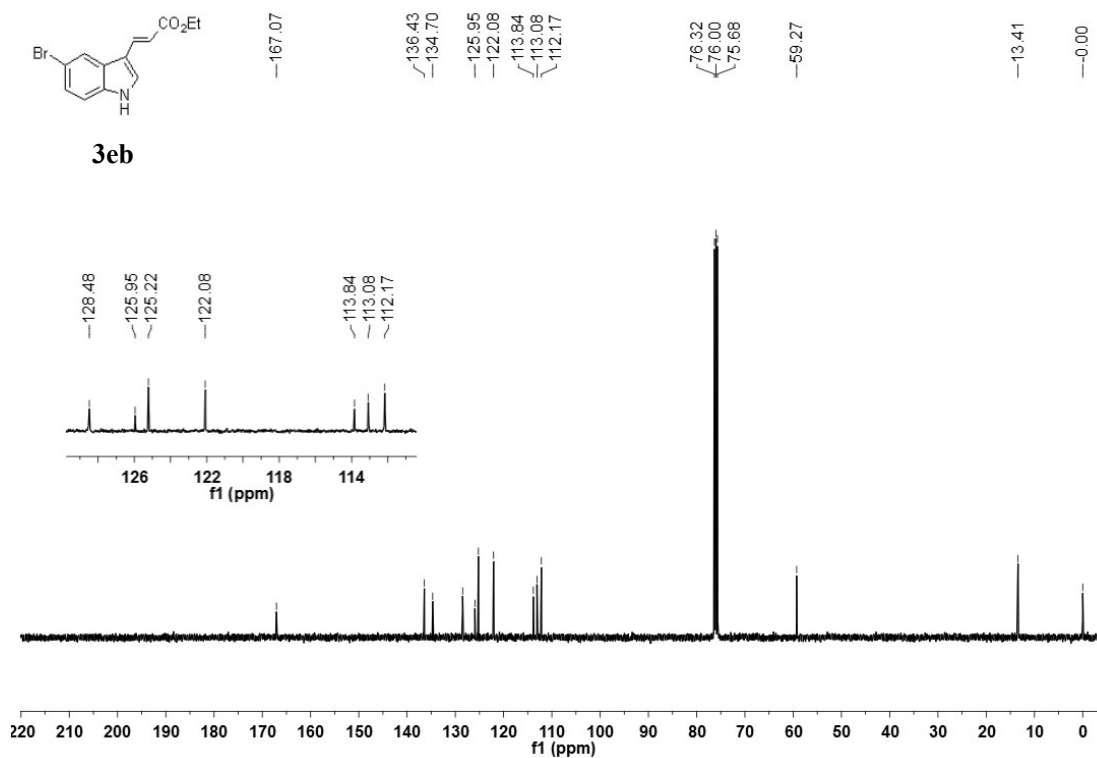

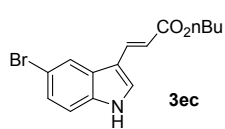

**3ec**

**(E)-butyl 3-(5-bromo-1H-indol-3-yl)acrylate (3ec):** Yield 10%;  $^1\text{H NMR}$  (400 MHz,  $\text{CDCl}_3$ )  $\delta$  8.71 (s, 1H), 8.04 (s, 1H), 7.84 (d,  $J = 16.0$  Hz, 1H), 7.46 (d,  $J = 2.4$  Hz, 1H), 7.36 (d,  $J = 8.6$  Hz, 1H), 7.28 (d,  $J = 8.6$  Hz, 1H), 6.40 (d,  $J = 16.0$  Hz, 1H), 4.23 (t,  $J = 6.7$  Hz, 2H), 1.72 (q,  $J = 6.8$  Hz, 2H), 1.52 – 1.39 (m, 2H), 0.98 (t,  $J = 7.4$  Hz, 3H).  $^{13}\text{C NMR}$  (100 MHz,  $\text{CDCl}_3$ )  $\delta$  168.23, 137.40, 135.69, 129.43, 126.97, 126.28, 123.12, 114.89, 114.18, 113.23, 113.16, 64.28, 30.90, 19.26, 13.79.

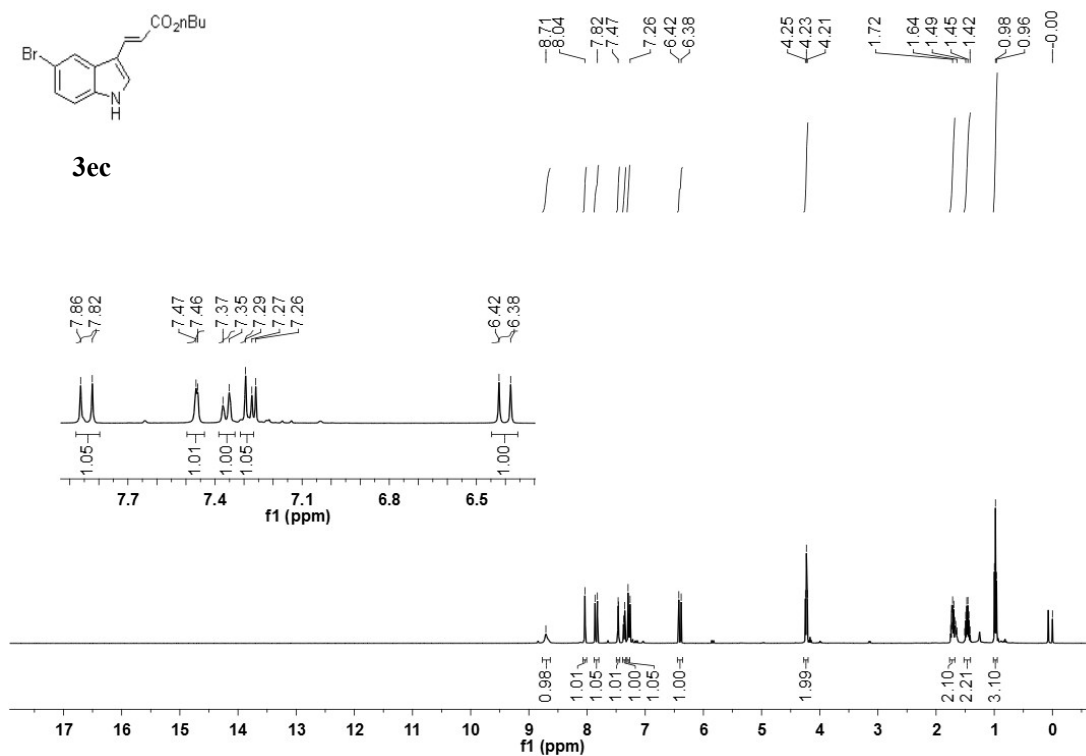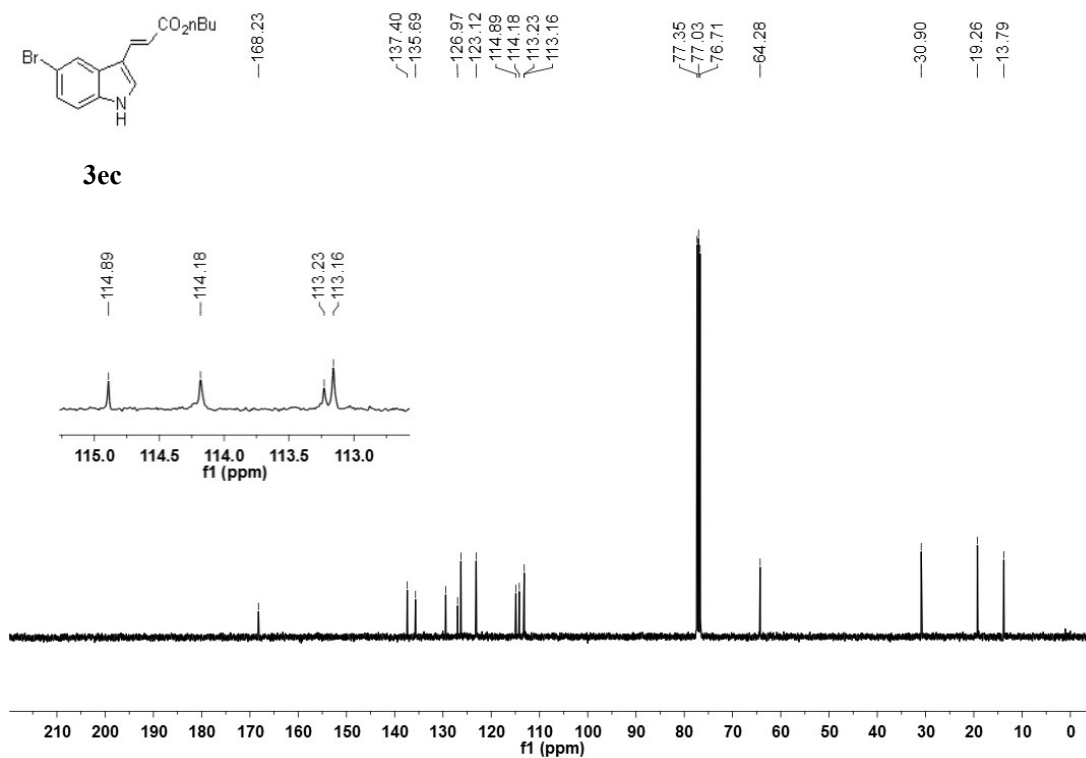

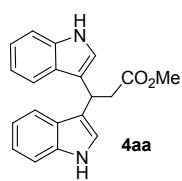

**methyl 3,3-di(1H-indol-3-yl)propanoate (4aa):** Yield 63%; <sup>1</sup>H NMR (400 MHz, CDCl<sub>3</sub>) δ 7.79 (s, 2H), 7.54 (d, *J* = 7.5 Hz, 2H), 7.18 (d, *J* = 7.6 Hz, 2H), 7.10 (t, *J* = 7.0 Hz, 2H), 7.00 (t, *J* = 6.9 Hz, 2H), 6.74 (s, 2H), 5.07 (t, *J* = 6.9 Hz, 1H), 3.52 (s, 3H), 3.15 (d, *J* = 7.3 Hz, 2H). <sup>13</sup>C NMR (100 MHz, CDCl<sub>3</sub>) δ 174.74, 137.99, 128.01, 123.33, 123.28, 120.83, 120.62, 119.86, 112.73, 53.15, 42.44, 32.22.

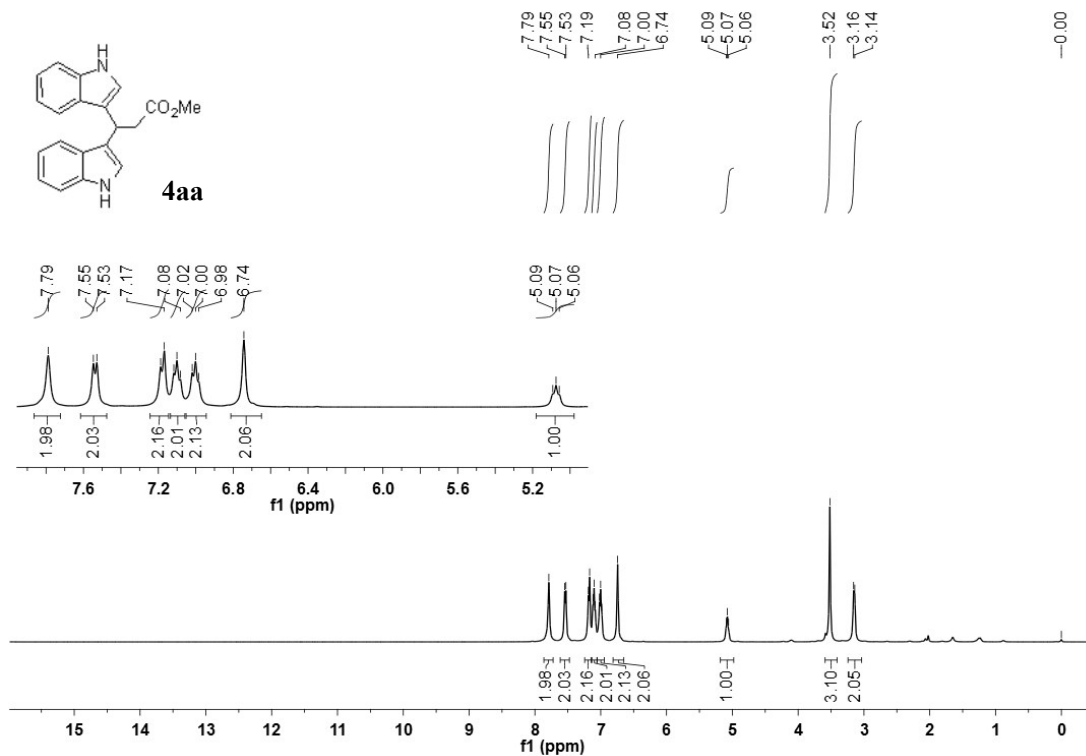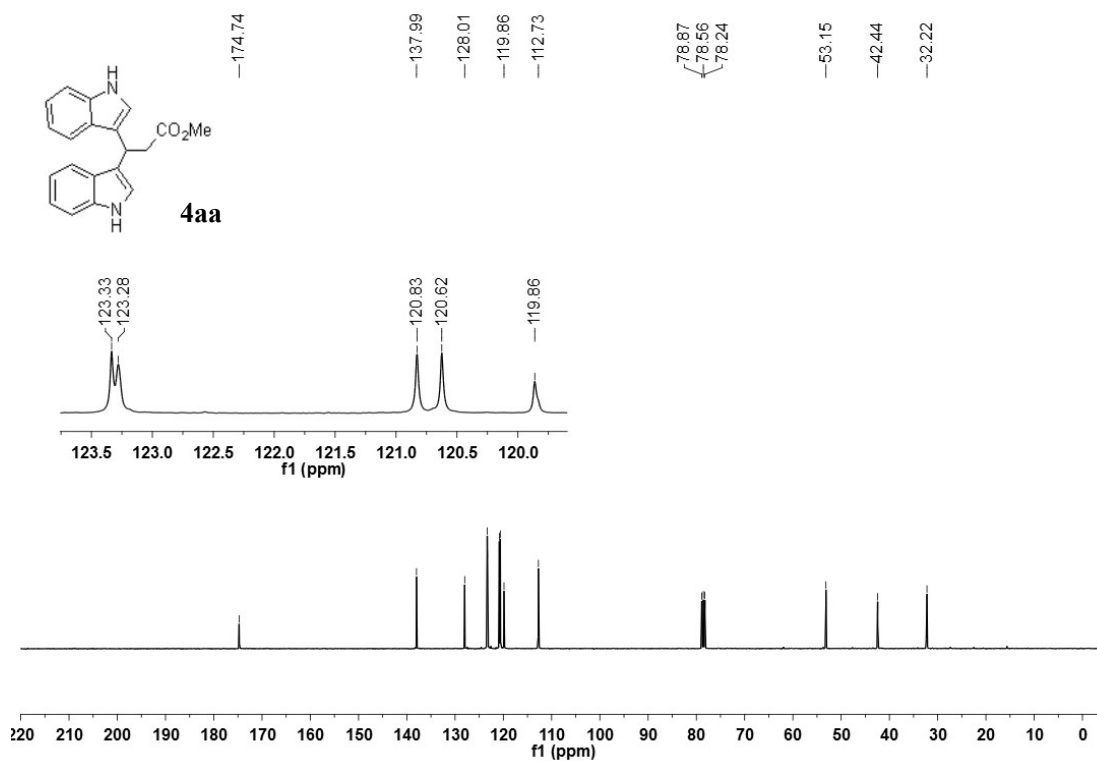



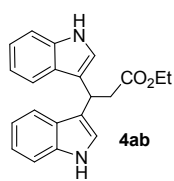

**ethyl 3,3-di(1H-indol-3-yl)propanoate (4ab):** Yield 70%;  $^1\text{H NMR}$  (400 MHz,  $\text{CDCl}_3$ )  $\delta$  7.88 (s, 2H), 7.57 (d,  $J = 7.9$  Hz, 2H), 7.26 (d,  $J = 8.1$  Hz, 2H), 7.13 (t,  $J = 7.6$  Hz, 2H), 7.02 (t,  $J = 7.1$  Hz, 2H), 6.90 (d,  $J = 2.2$  Hz, 2H), 5.10 (t,  $J = 7.7$  Hz, 1H), 4.01 (q,  $J = 7.1$  Hz, 2H), 3.17 (d,  $J = 7.7$  Hz, 2H), 1.08 (t,  $J = 7.1$  Hz, 3H).  $^{13}\text{C NMR}$  (100 MHz,  $\text{CDCl}_3$ )  $\delta$  172.68, 136.62, 126.72, 121.94, 121.77, 119.53, 119.23, 118.73, 111.17, 60.40, 41.26, 30.88, 14.08.

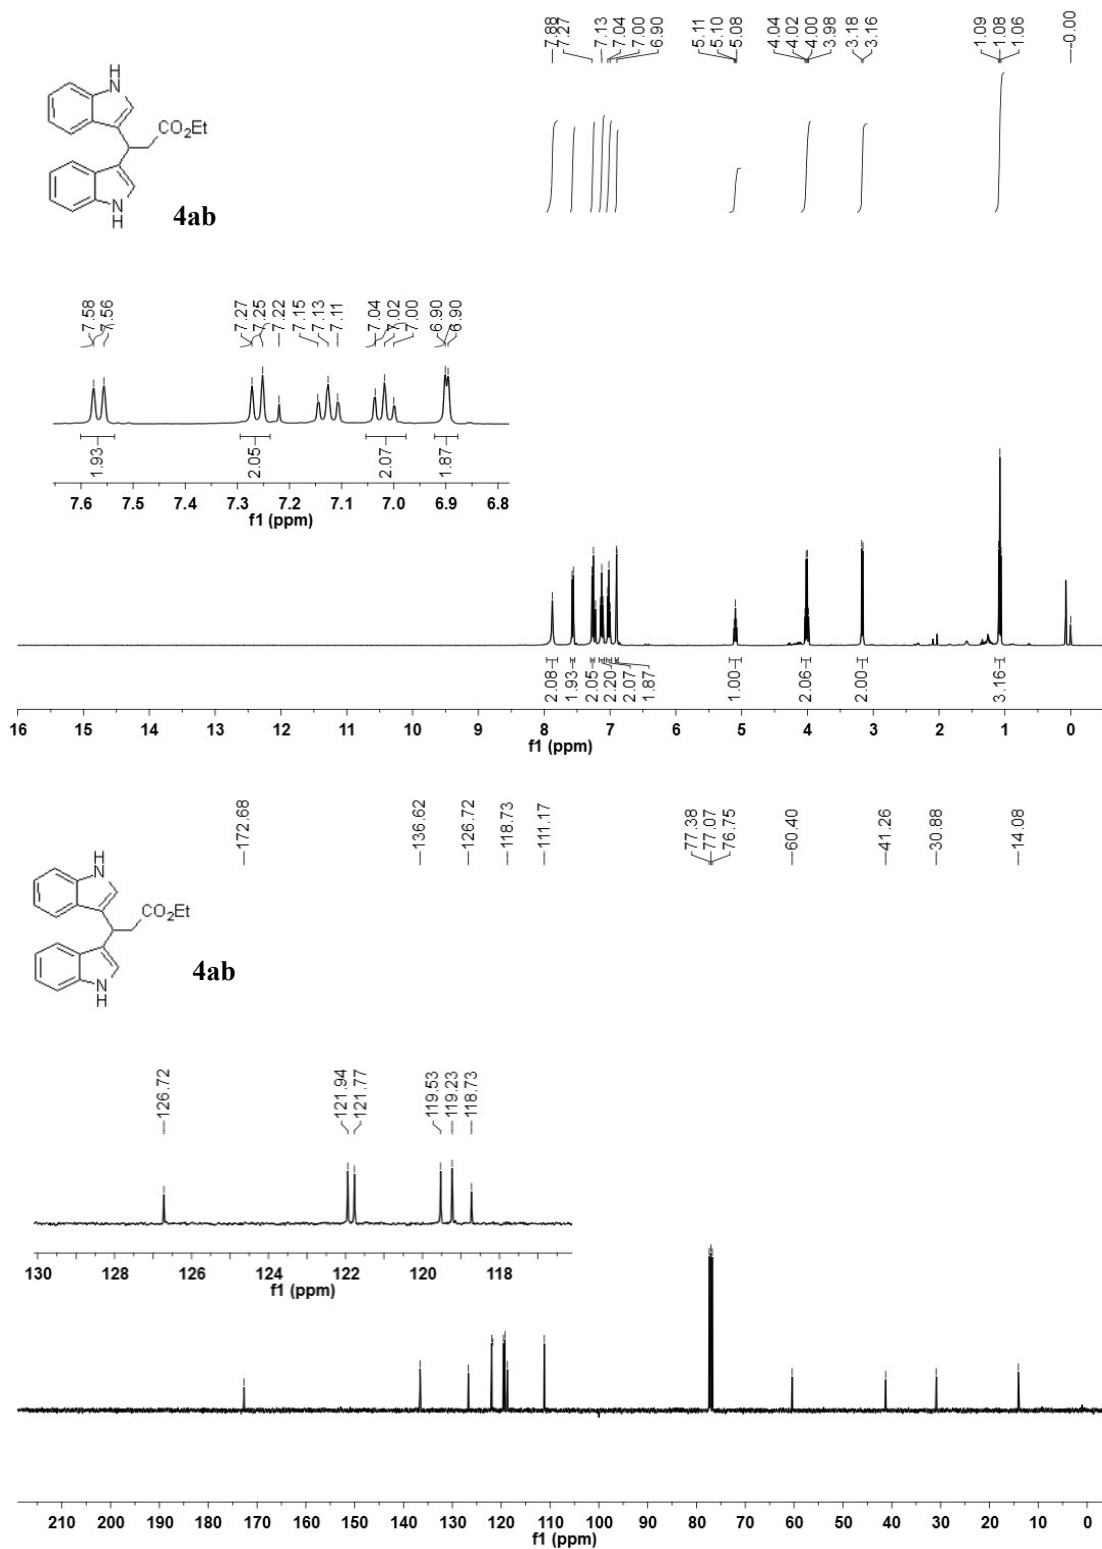

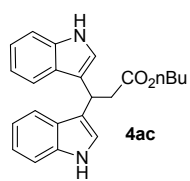

**butyl 3,3-di(1*H*-indol-3-yl)propanoate (4ac):** Yield 74%; <sup>1</sup>H NMR (400 MHz, CDCl<sub>3</sub>) δ 7.90 (s, 2H), 7.57 (d, *J* = 7.9 Hz, 2H), 7.27 (d, *J* = 8.1 Hz, 2H), 7.13 (t, *J* = 7.6 Hz, 2H), 7.02 (t, *J* = 7.5 Hz, 2H), 6.92 (d, *J* = 2.2 Hz, 2H), 5.10 (t, *J* = 7.7 Hz, 1H), 3.96 (t, *J* = 6.6 Hz, 2H), 3.17 (d, *J* = 7.7 Hz, 2H), 1.43 (q, *J* = 6.7 Hz, 2H), 1.12 – 1.22 (m, 2H), 0.78 (t, *J* = 7.4 Hz, 3H). <sup>13</sup>C NMR (100 MHz, CDCl<sub>3</sub>) δ 172.73, 136.61, 126.69, 121.93, 121.72, 119.49, 119.22, 118.72, 111.14, 64.30, 41.25, 30.93, 30.57, 18.98, 13.61. HRMS (ESI) *m/z*: calculated for C<sub>23</sub>H<sub>24</sub>N<sub>2</sub>O<sub>2</sub>Na [M+Na]<sup>+</sup>: 383.1735, found 383.1769.

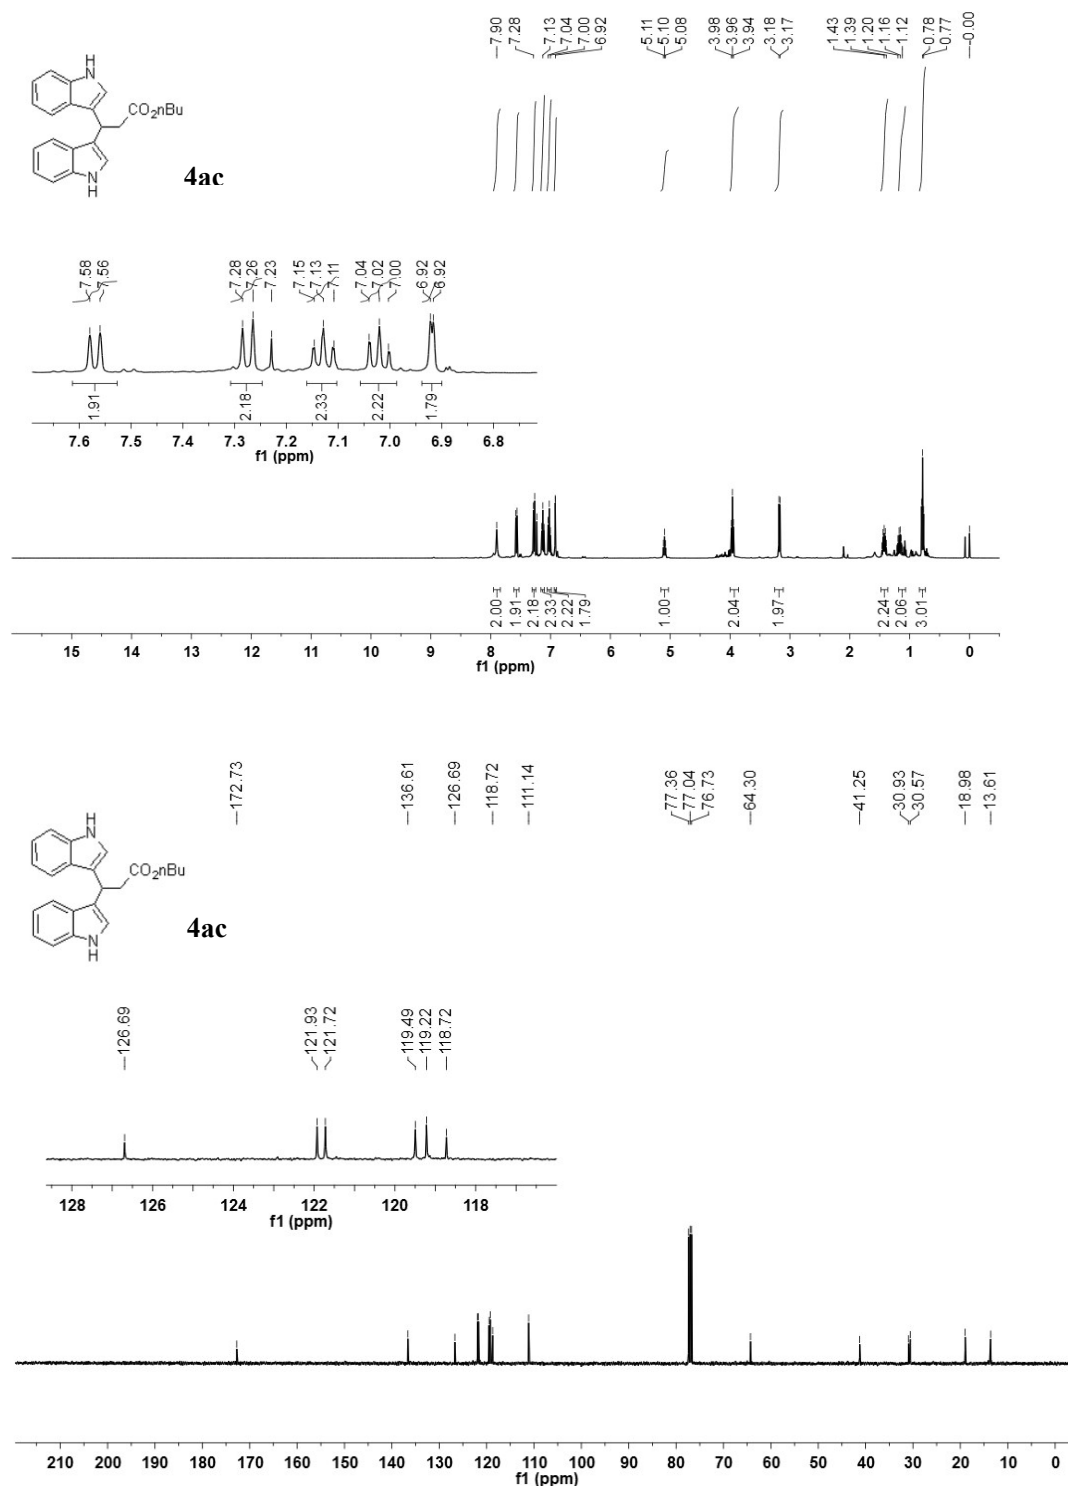

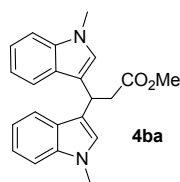

**methyl 3,3-bis(1-methyl-1H-indol-3-yl)propanoate (4ba):** Yield 77%;  $^1\text{H NMR}$  (400 MHz,  $\text{CDCl}_3$ )  $\delta$  7.59 (d,  $J = 7.9$  Hz, 2H), 7.26 (d,  $J = 8.2$  Hz, 2H), 7.19 (td,  $J_1 = 7.0$  Hz,  $J_2 = 0.9$  Hz, 2H), 7.04 (td,  $J_1 = 7.0$  Hz,  $J_2 = 0.9$  Hz, 2H), 6.84 (s, 2H), 5.11 (t,  $J = 7.7$  Hz, 1H), 3.69 (s, 6H), 3.57 (s, 3H), 3.17 (d,  $J = 7.7$  Hz, 2H).  $^{13}\text{C NMR}$  (100 MHz,  $\text{CDCl}_3$ )  $\delta$  174.34, 138.71, 128.44, 127.80, 122.89, 121.00, 120.07, 118.76, 110.58, 52.99, 42.70, 34.06, 32.02.

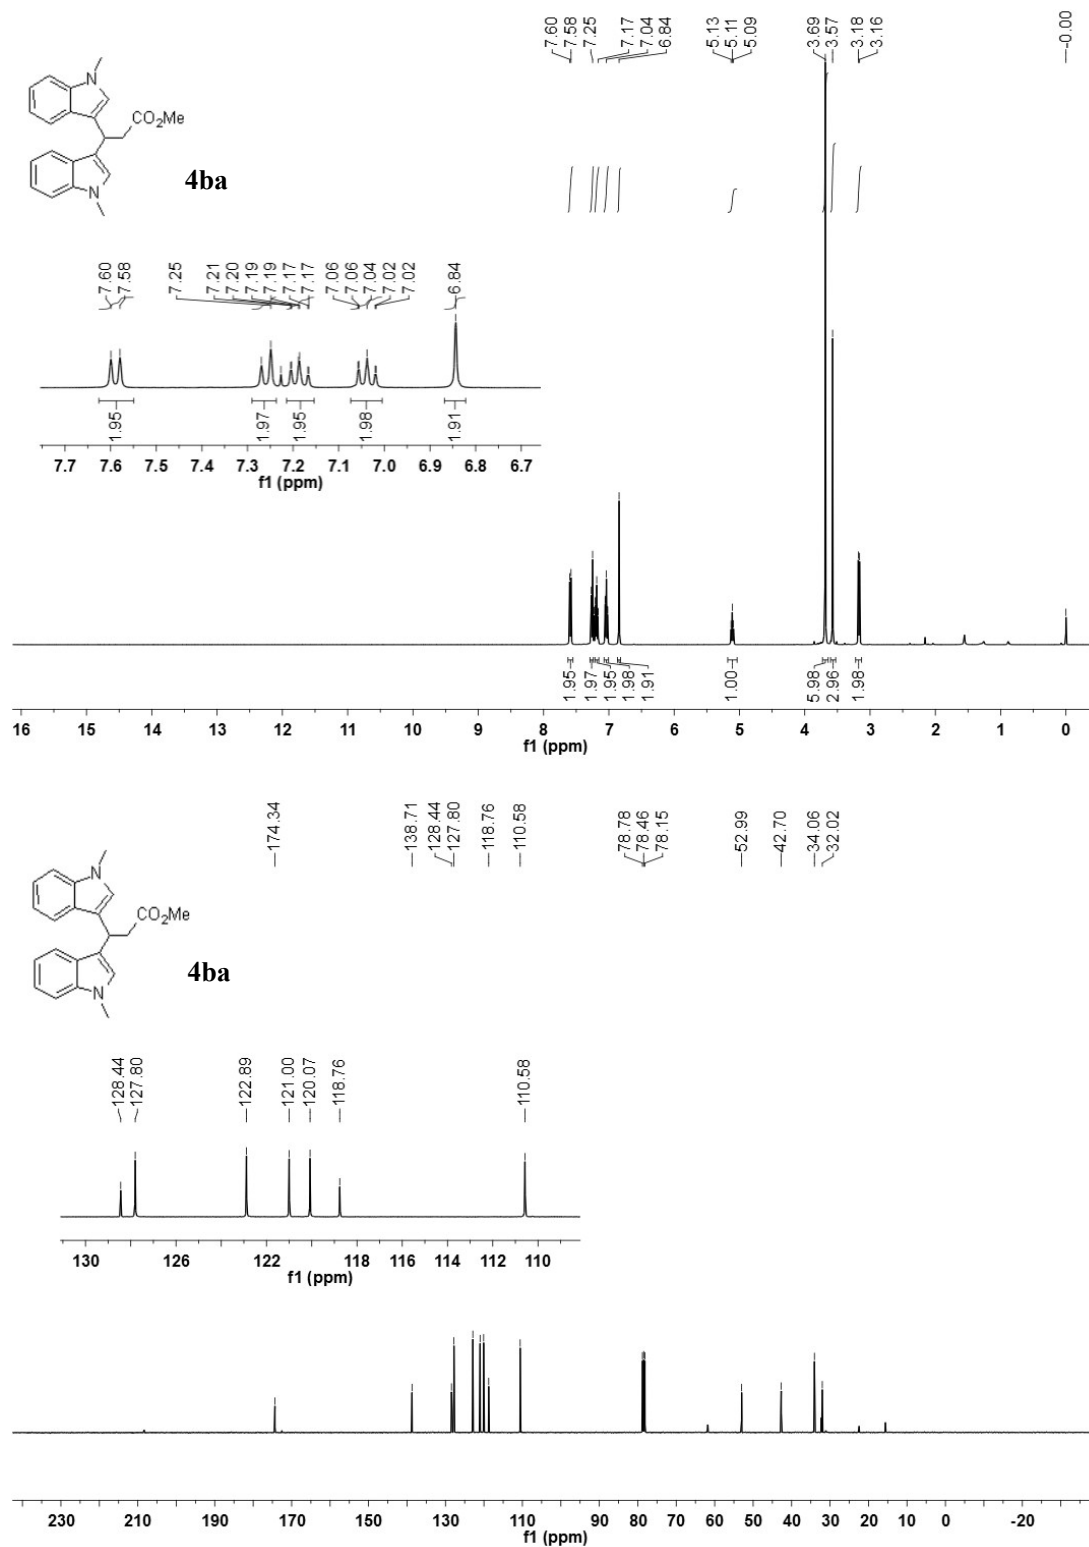

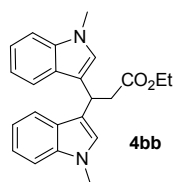

**ethyl 3,3-bis(1-methyl-1H-indol-3-yl)propanoate (4bb):** Yield 71%;  $^1\text{H NMR}$  (400 MHz,  $\text{CDCl}_3$ )  $\delta$  7.59 (d,  $J = 7.9$  Hz, 2H), 7.25 (d,  $J = 8.2$  Hz, 2H), 7.17 (t,  $J = 7.6$  Hz, 2H), 7.03 (t,  $J = 7.4$  Hz, 2H), 6.85 (s, 2H), 5.10 (t,  $J = 7.7$  Hz, 1H), 4.02 (q,  $J = 7.1$  Hz, 2H), 3.68 (s, 6H), 3.15 (d,  $J = 7.7$  Hz, 2H), 1.08 (t,  $J = 7.1$  Hz, 3H).  $^{13}\text{C NMR}$  (100 MHz,  $\text{CDCl}_3$ )  $\delta$  172.50, 137.33, 127.14, 126.45, 121.48, 119.67, 118.67, 117.47, 109.15, 60.26, 41.61, 32.67, 30.72, 14.10.

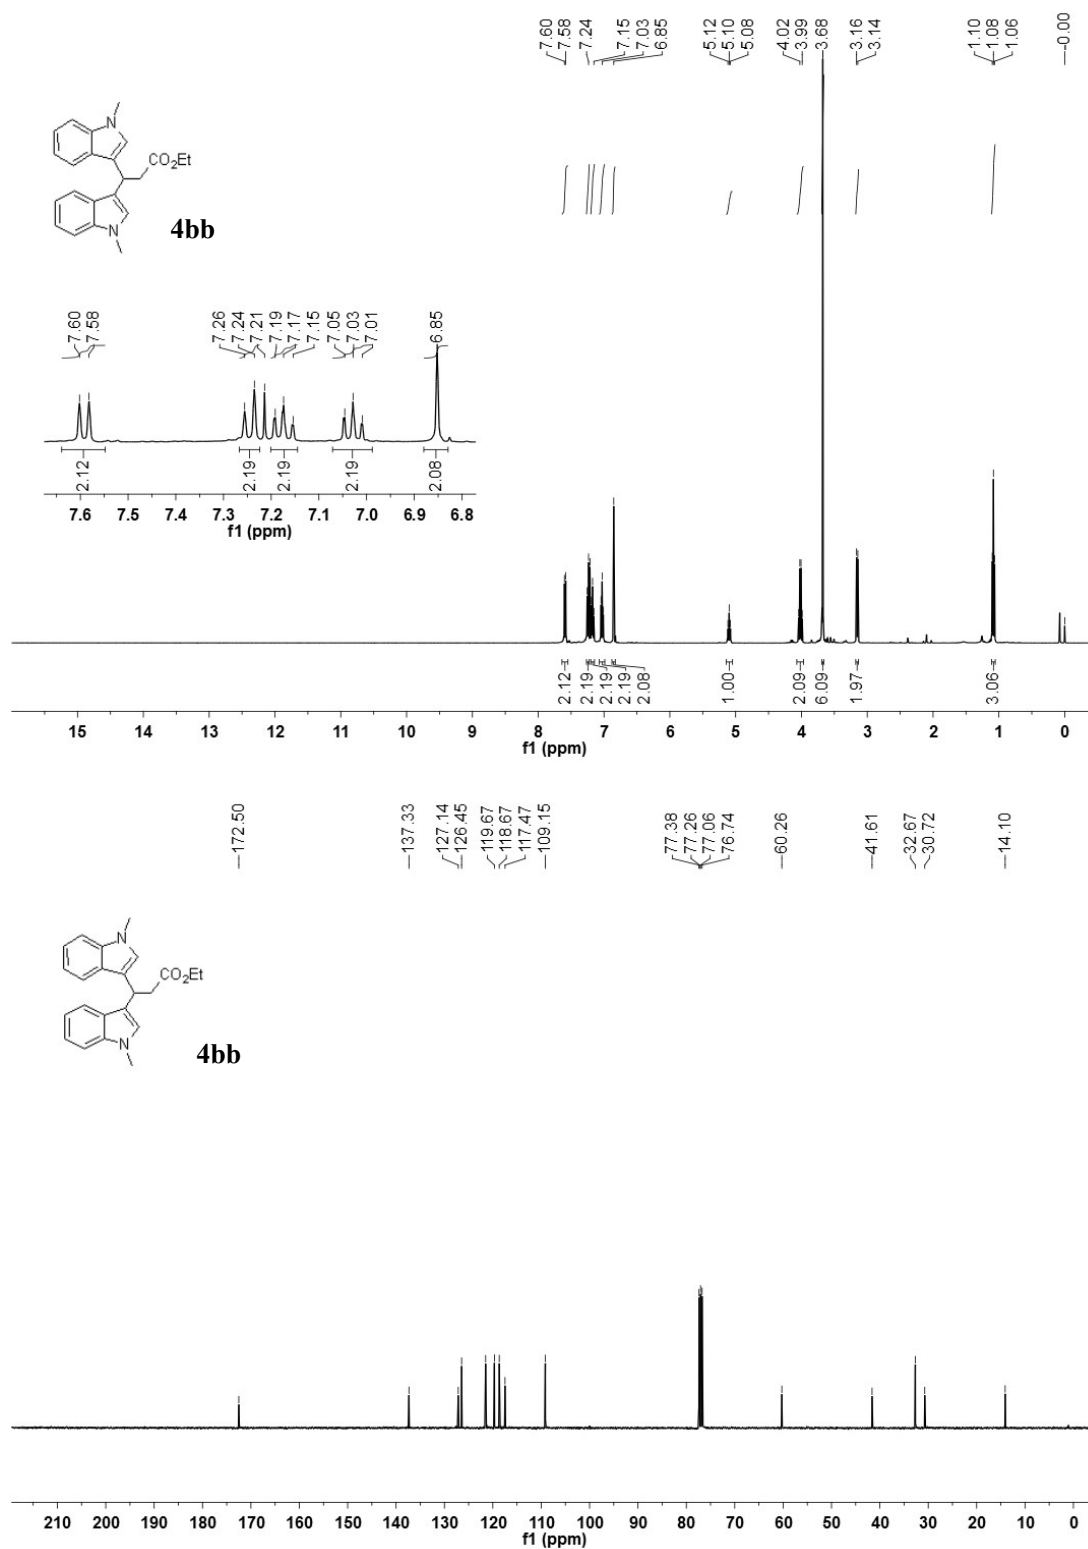

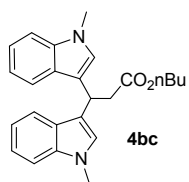

**butyl 3,3-bis(1-methyl-1H-indol-3-yl)propanoate (4bc):** Yield 73%;  $^1\text{H}$  NMR (400 MHz,  $\text{CDCl}_3$ )  $\delta$  7.59 (d,  $J = 7.9$  Hz, 2H), 7.25 (d,  $J = 8.2$  Hz, 2H), 7.17 (t,  $J = 7.6$  Hz, 2H), 7.03 (t,  $J = 7.4$  Hz, 2H), 6.85, 5.09 (t,  $J = 7.7$  Hz, 1H), 3.96 (t,  $J = 6.6$  Hz, 2H), 3.68 (s, 6H), 3.16 (d,  $J = 7.7$  Hz, 2H), 1.42 (q,  $J = 6.7$  Hz, 2H), 1.22 – 1.11 (m, 2H), 0.79 (t,  $J = 7.4$  Hz, 3H).  $^{13}\text{C}$  NMR (100 MHz,  $\text{CDCl}_3$ )  $\delta$  172.61, 137.34, 127.13, 126.43, 121.48, 119.65, 118.68, 117.45, 109.13, 64.17, 41.62, 32.66, 30.81, 30.61, 18.99, 13.63. HRMS (ESI)  $m/z$ : calculated for  $\text{C}_{25}\text{H}_{28}\text{N}_2\text{O}_2\text{Na}$   $[\text{M}+\text{Na}]^+$ : 411.2048, found 411.2046.

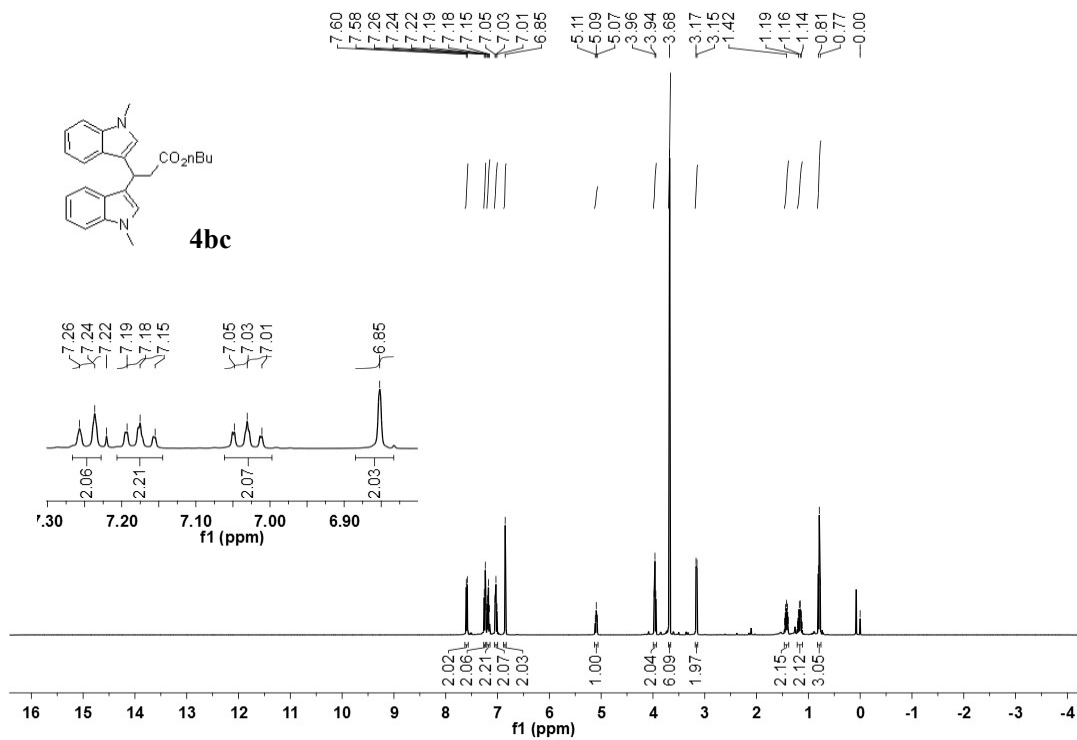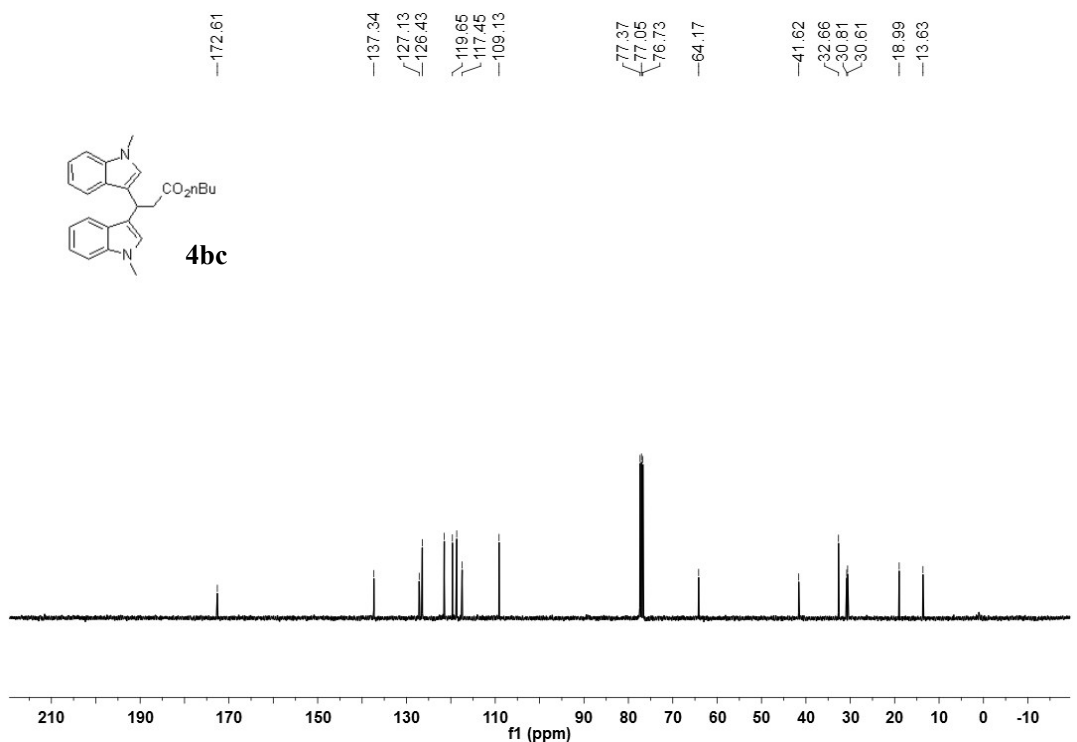

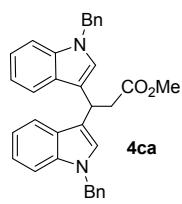

**methyl 3,3-bis(1-benzyl-1H-indol-3-yl)propanoate (4ca):** Yield 68%;  $^1\text{H NMR}$  (400 MHz,  $\text{CDCl}_3$ )  $\delta$  7.56 (d,  $J = 7.9$  Hz, 2H), 7.31 – 7.17 (m, 8H), 7.10 (t,  $J = 7.6$  Hz, 2H), 7.05 – 6.96 (m, 8H), 5.23 (s, 4H), 5.12 (t,  $J = 7.7$  Hz, 1H), 3.52 (s, 3H), 3.19 (d,  $J = 7.7$  Hz, 2H).  $^{13}\text{C NMR}$  (100 MHz,  $\text{CDCl}_3$ )  $\delta$  172.90, 137.84, 137.06, 128.70, 127.47, 127.41, 126.60, 125.91, 121.74, 119.86, 118.98, 117.88, 109.71, 51.53, 49.89, 41.07, 31.09. HRMS (ESI)  $m/z$ : calculated for  $\text{C}_{34}\text{H}_{30}\text{N}_2\text{O}_2$   $[\text{M}+\text{Na}]^+$ : 498.2305, found 498.2347.

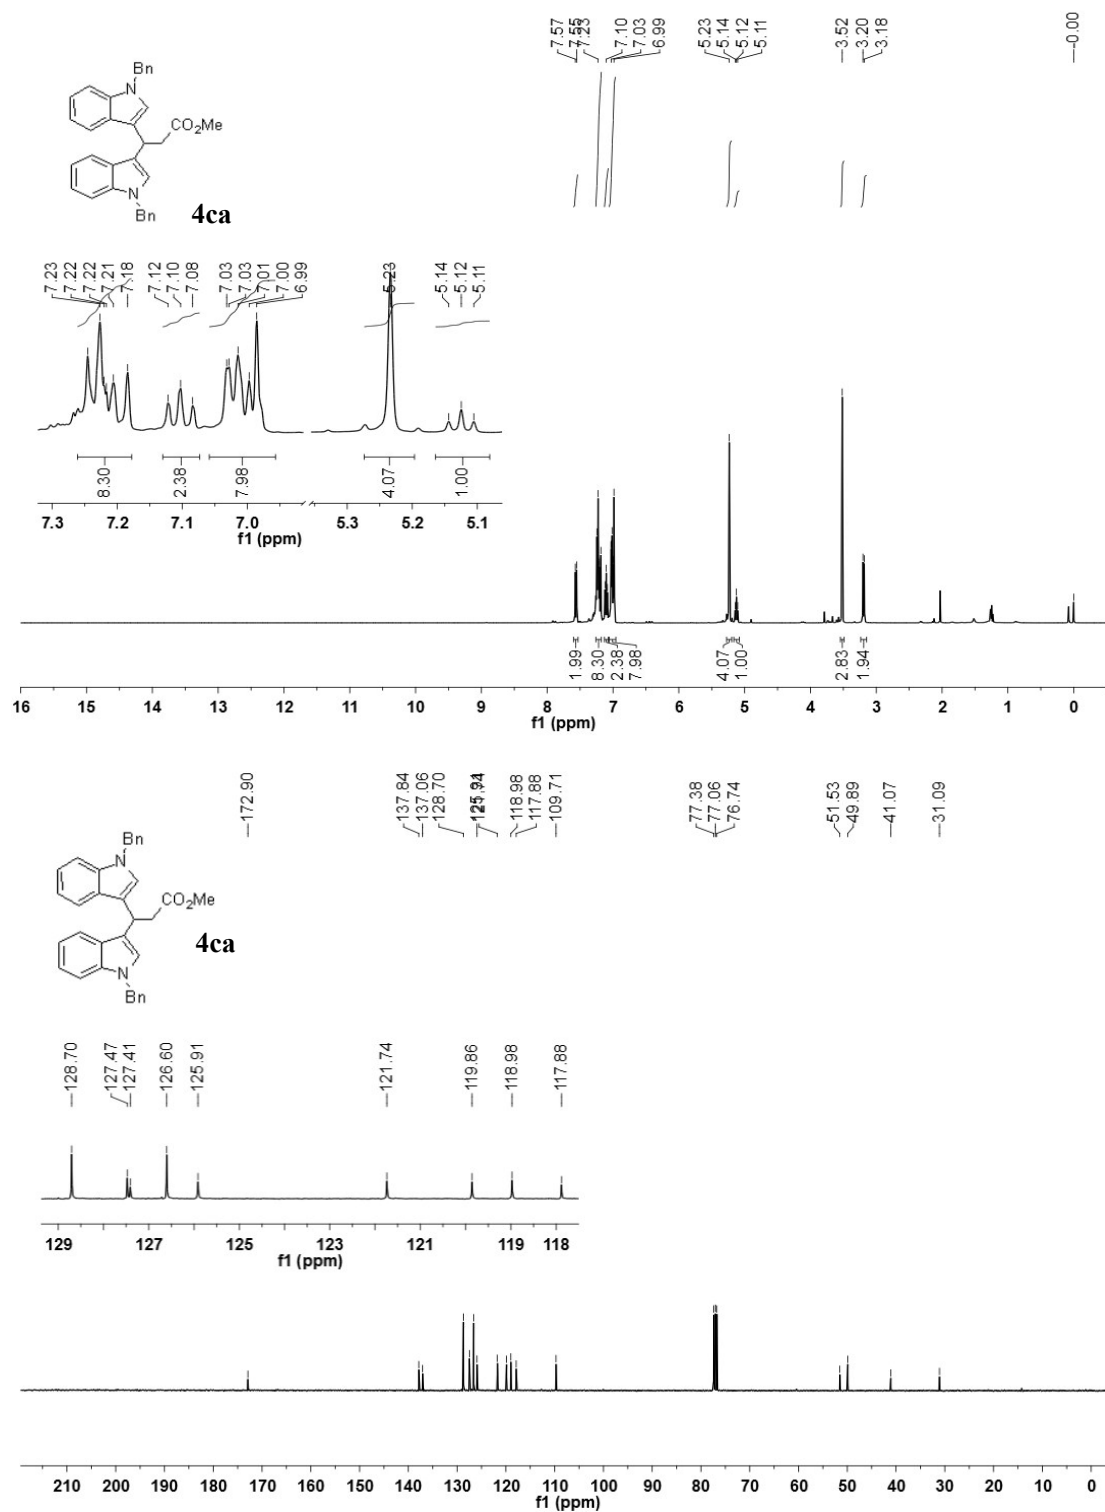

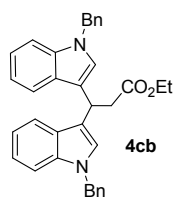

**ethyl 3,3-bis(1-benzyl-1H-indol-3-yl)propanoate (4cb):** Yield 69%;  $^1\text{H NMR}$  (400 MHz,  $\text{CDCl}_3$ )  $\delta$  7.57 (d,  $J = 7.9$  Hz, 2H), 7.27 – 7.17 (m, 8H), 7.10 (t,  $J = 7.6$  Hz, 2H), 7.06 – 6.95 (m, 8H), 5.23 (s, 4H), 5.12 (t,  $J = 7.7$  Hz, 1H), 3.98 (q,  $J = 7.1$  Hz, 2H), 3.18 (d,  $J = 7.7$  Hz, 2H), 1.04 (t,  $J = 7.1$  Hz, 3H).  $^{13}\text{C NMR}$  (100 MHz,  $\text{CDCl}_3$ )  $\delta$  172.44, 137.84, 137.04, 128.69, 127.46, 127.45, 126.60, 125.89, 121.70, 119.89,

118.93, 117.97, 109.67, 60.28, 49.89, 41.33, 31.06, 14.09. HRMS (ESI)

$m/z$ : calculated for  $\text{C}_{35}\text{H}_{32}\text{N}_2\text{O}_2\text{Na}$   $[\text{M}+\text{Na}]^+$ : 535.2361, found 535.2404.

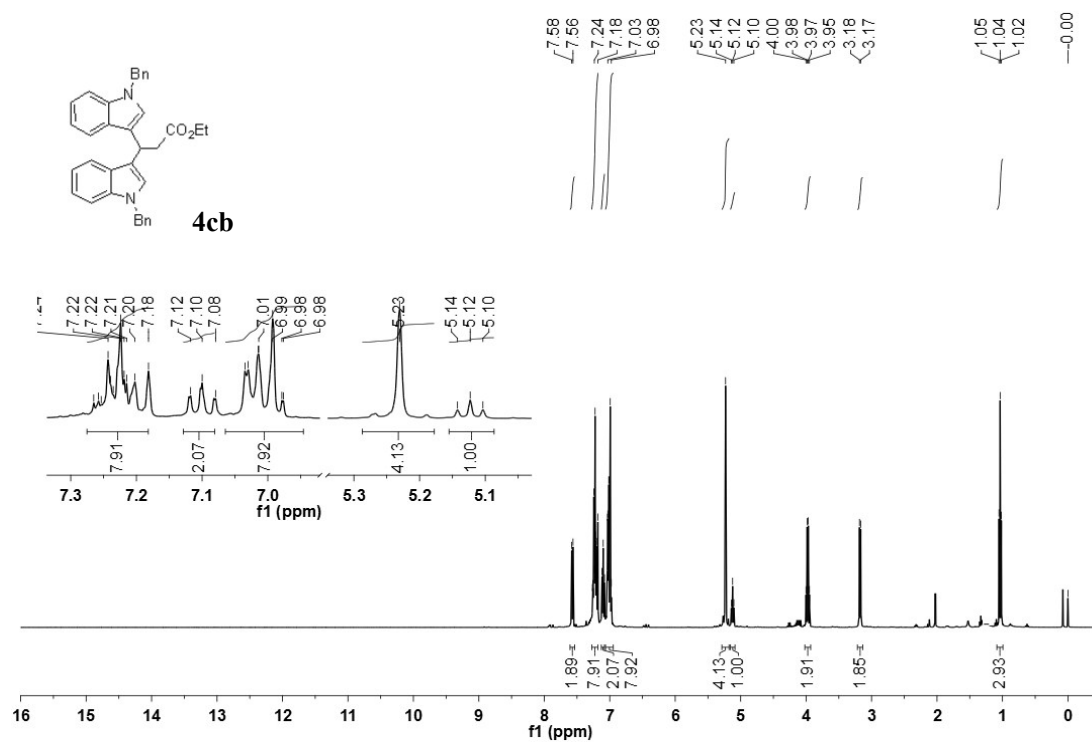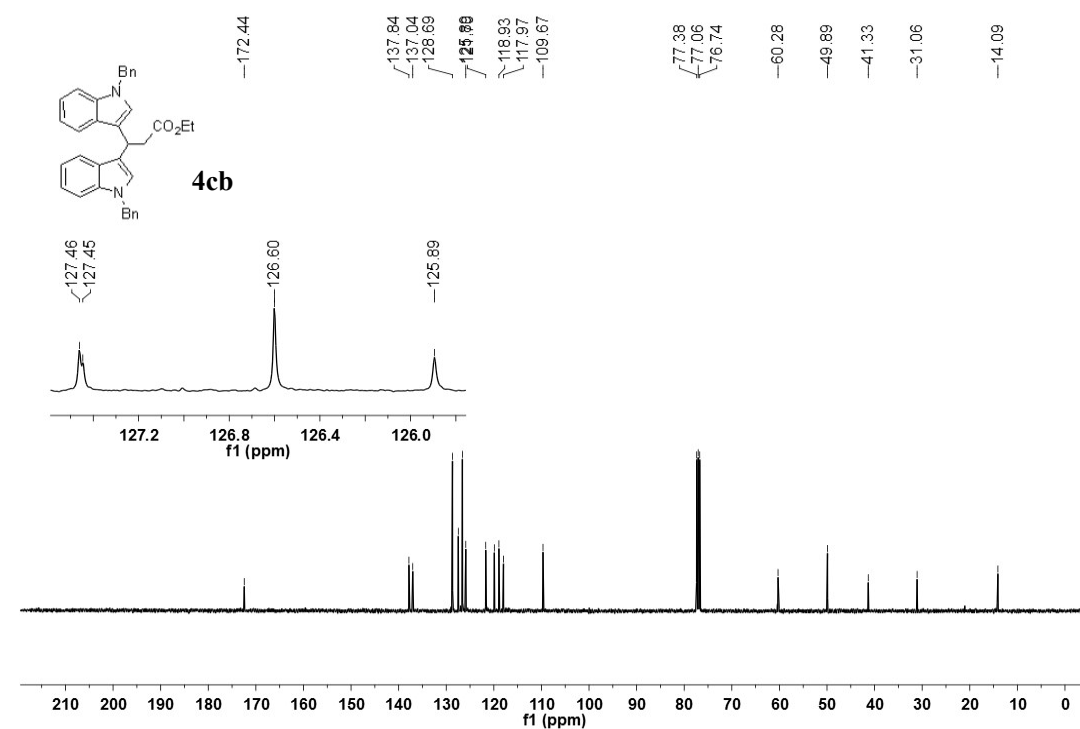

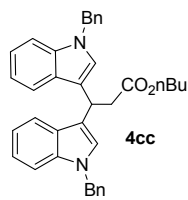

**butyl 3,3-bis(1-benzyl-1H-indol-3-yl)propanoate (4cc):** Yield 58%;  $^1\text{H}$  NMR (400 MHz,  $\text{CDCl}_3$ )  $\delta$  7.57 (d,  $J = 7.9$  Hz, 2H), 7.30 – 7.16 (m, 8H), 7.10 (t,  $J = 7.6$  Hz, 2H), 7.07 – 6.93 (m, 8H), 5.23 (s, 4H), 5.12 (t,  $J = 7.8$  Hz, 1H), 3.93 (t,  $J = 6.7$  Hz, 2H), 3.18 (d,  $J = 7.8$  Hz, 2H), 1.40 (q, 6.8 Hz, 2H), 1.21 – 1.10 (m, 2H), 0.77 (t,  $J = 7.4$  Hz, 2H).  $^{13}\text{C}$  NMR (100 MHz,  $\text{CDCl}_3$ )  $\delta$  172.54, 137.83, 137.05, 128.69, 127.46, 127.44, 126.60, 125.89, 121.70, 119.87, 118.94, 117.97, 109.67, 64.23, 49.90, 41.35, 31.11, 30.57, 19.02, 13.63. HRMS (ESI)  $m/z$ : calculated for  $\text{C}_{37}\text{H}_{36}\text{N}_2\text{O}_2\text{Na}$   $[\text{M}+\text{Na}]^+$ : 563.2674, found 563.2712.

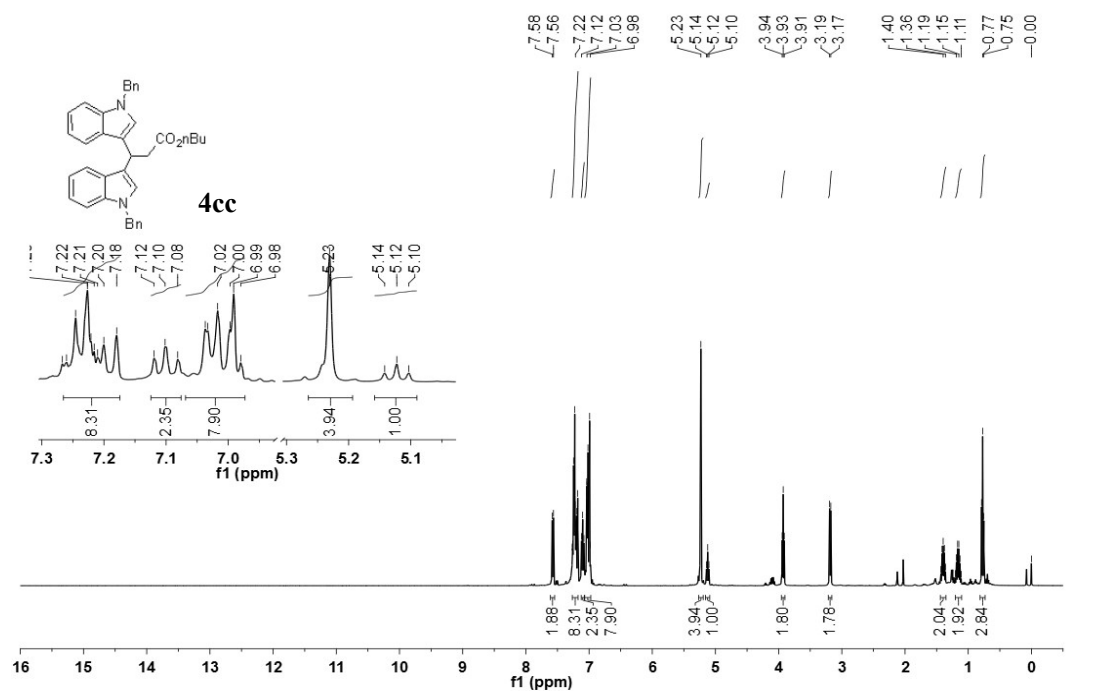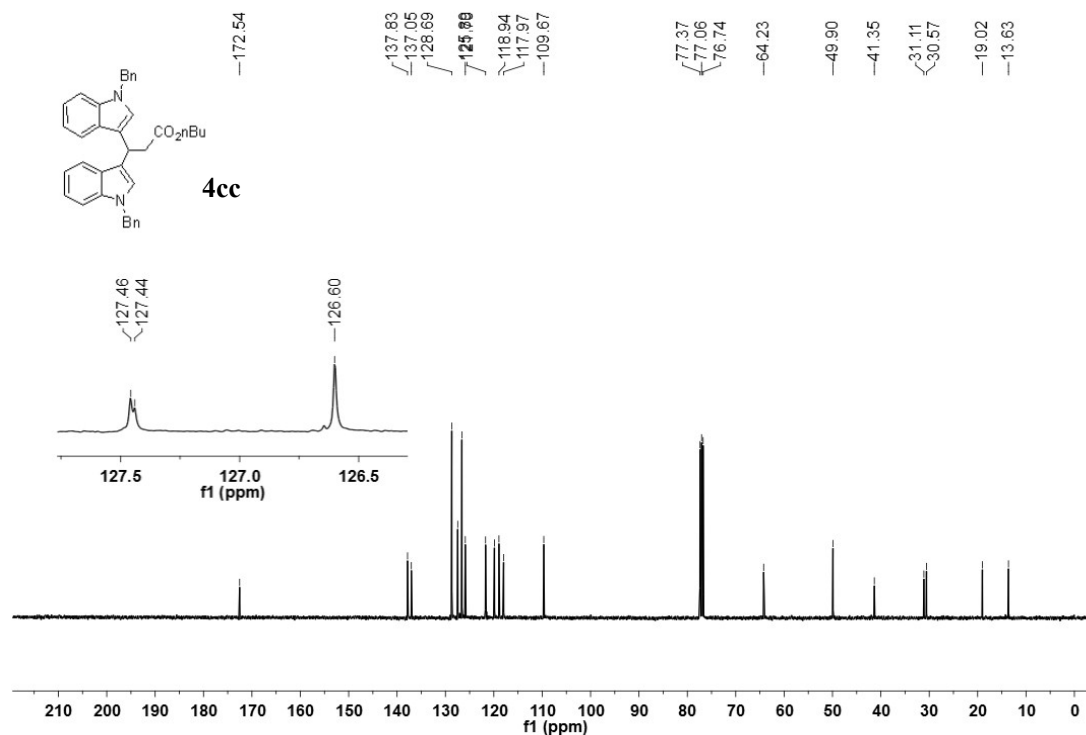



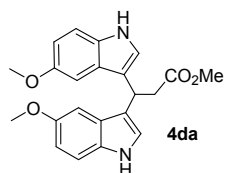

**methyl 3,3-bis(5-methoxy-1H-indol-3-yl)propanoate (4da):** Yield 55%;  $^1\text{H}$  NMR (400 MHz,  $\text{CDCl}_3$ )  $\delta$  7.87 (s, 2H), 7.19 (d,  $J = 8.8$  Hz, 2H), 7.01 (d,  $J = 2.4$  Hz, 2H), 6.93 (d,  $J = 2.3$  Hz, 2H), 6.81 (dd,  $J_1 = 8.8$  Hz,  $J_2 = 2.4$  Hz, 2H), 5.01 (t,  $J = 7.7$  Hz, 1H), 3.76 (s, 6H), 3.59 (s, 3H), 3.17 (d,  $J = 7.7$  Hz, 2H).  $^{13}\text{C}$  NMR (100 MHz,  $\text{CDCl}_3$ )  $\delta$  173.11, 153.75, 131.82, 127.09, 122.49, 118.33, 111.95, 111.82, 101.62, 55.94, 51.68, 40.65, 30.76.

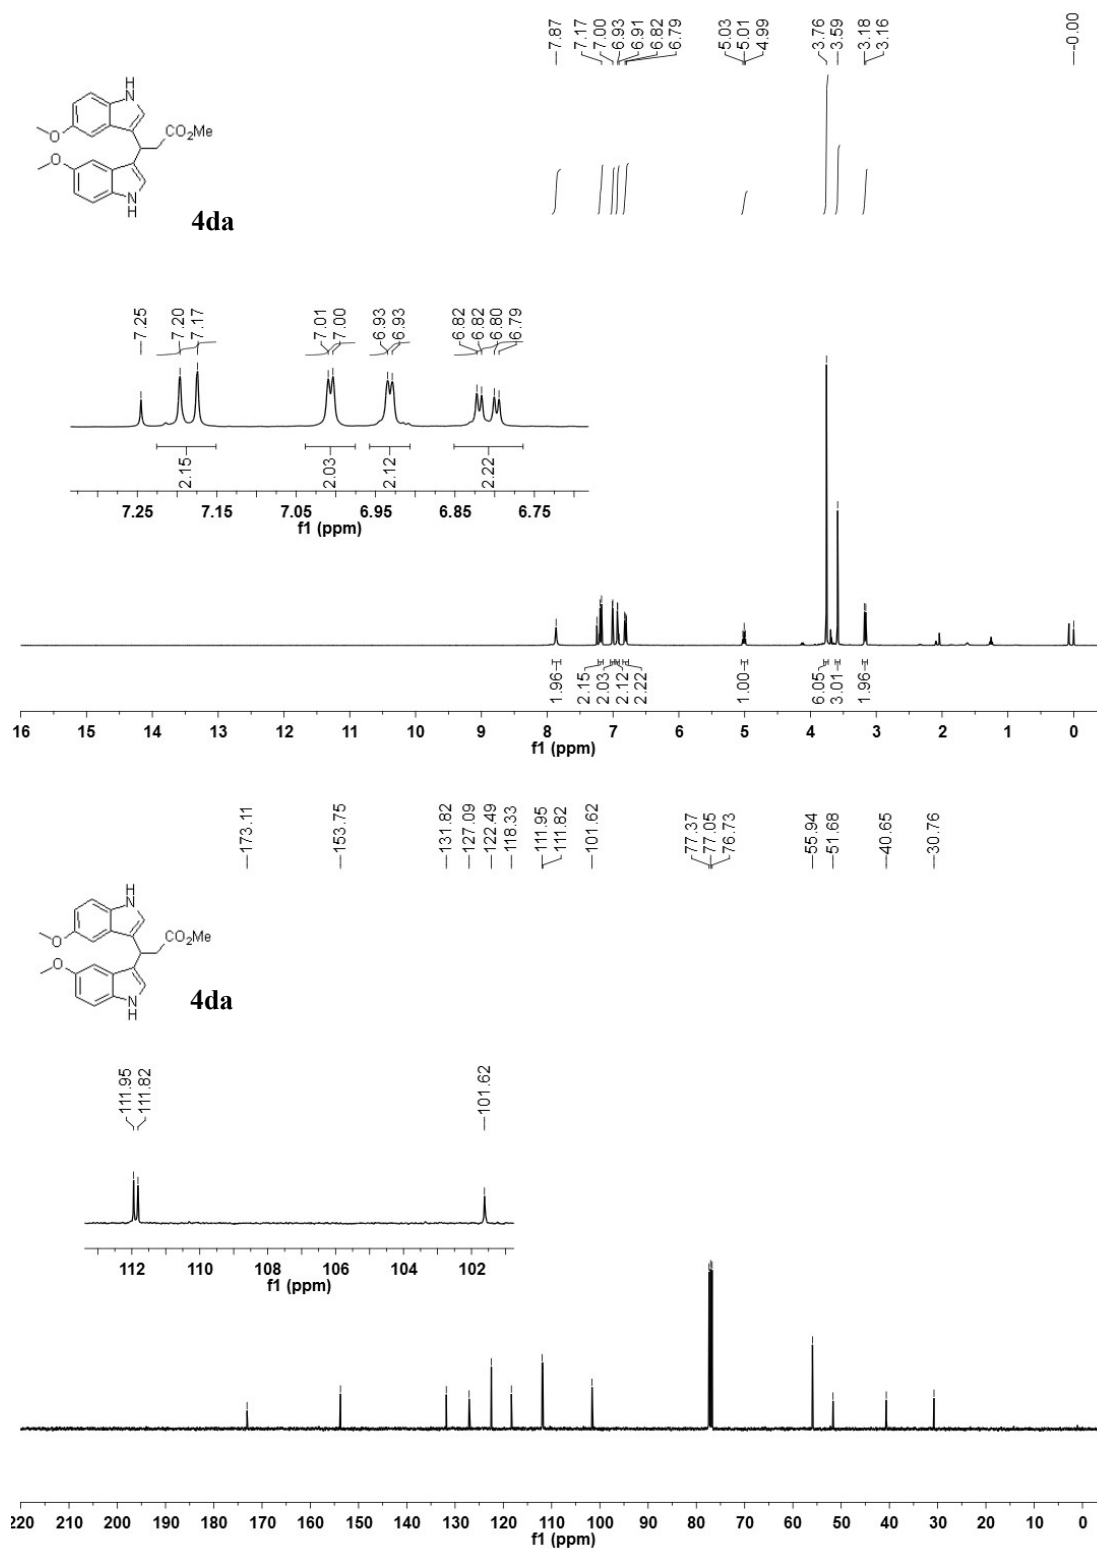

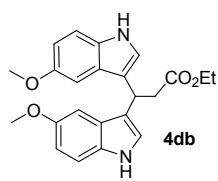

**ethyl 3,3-bis(5-methoxy-1H-indol-3-yl)propanoate (4db):** Yield 59%;  $^1\text{H}$  NMR (400 MHz,  $\text{CDCl}_3$ )  $\delta$  7.86 (s, 2H), 7.20 (d,  $J = 8.8$  Hz, 2H), 7.02 (d,  $J = 2.4$  Hz, 2H), 6.97 (d,  $J = 2.3$  Hz, 2H), 6.81 (dd,  $J_1 = 8.8$  Hz,  $J_2 = 2.4$  Hz, 2H), 5.01 (t,  $J = 7.7$  Hz, 1H), 4.04 (q,  $J = 7.1$  Hz, 2H), 3.76 (s, 6H), 3.16 (d,  $J = 7.7$  Hz, 2H), 1.11 (t,  $J = 7.1$  Hz, 3H).  $^{13}\text{C}$  NMR (100 MHz,  $\text{CDCl}_3$ )  $\delta$  172.63, 153.73, 131.80, 127.15, 122.47, 118.43, 111.93, 111.76, 101.67, 60.36, 55.93, 40.89, 30.79, 14.11. HRMS (ESI)  $m/z$ : calculated for  $\text{C}_{23}\text{H}_{24}\text{N}_2\text{O}_4\text{Na}$   $[\text{M}+\text{Na}]^+$ : 415.1634, found 415.1639.

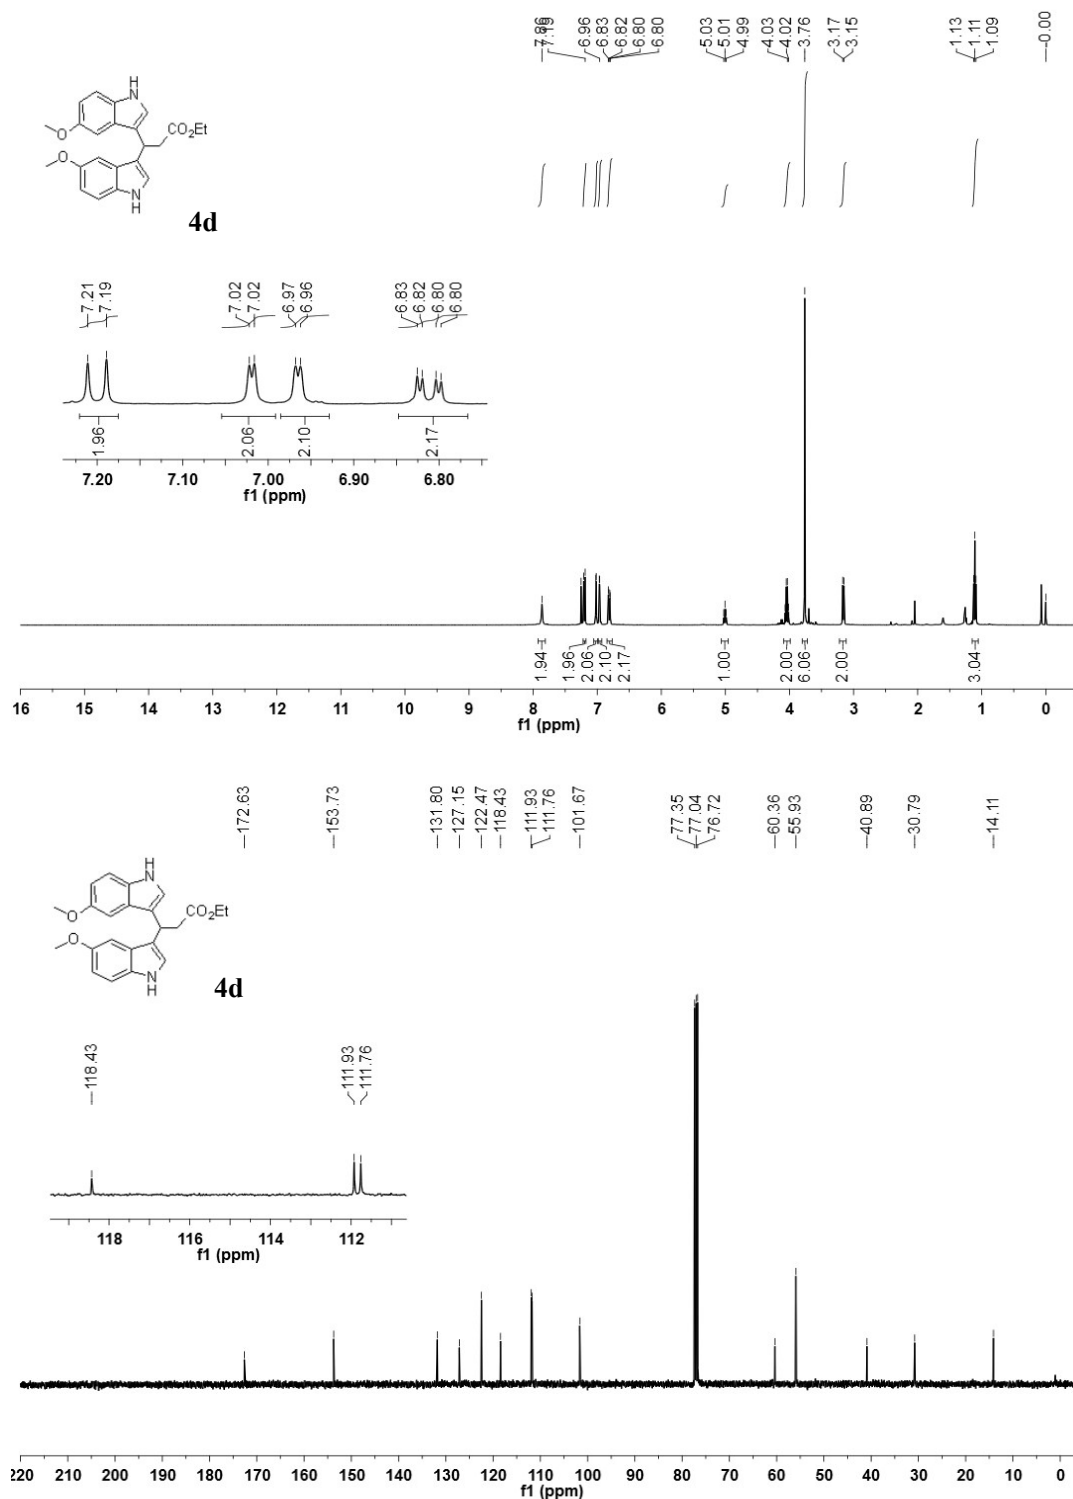

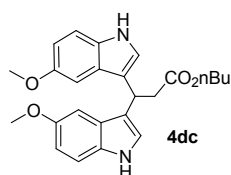

**butyl 3,3-bis(5-methoxy-1H-indol-3-yl)propanoate (4dc):** Yield 54%;  $^1\text{H}$  NMR (400 MHz,  $\text{CDCl}_3$ )  $\delta$  7.88 (s, 2H), 7.18 (dd,  $J_1 = 8.8$  Hz,  $J_2 = 1.5$  Hz, 2H), 7.02 (d,  $J = 2.0$  Hz, 2H), 6.93 (d,  $J = 2.3$  Hz, 2H), 6.81 (dd,  $J_1 = 8.8$  Hz,  $J_2 = 2.4$  Hz, 2H), 5.00 (t,  $J = 7.7$  Hz, 1H), 3.98 (t,  $J = 6.6$  Hz, 2H), 3.76 (s, 6H), 3.16 (d,  $J = 7.7$  Hz, 2H), 1.45 (q,  $J = 6.7$  Hz, 2H), 1.26 – 1.10 (m, 2H), 0.80 (t,  $J = 7.4$

Hz, 3H).  $^{13}\text{C}$  NMR (100 MHz,  $\text{CDCl}_3$ )  $\delta$  172.80, 153.73, 131.83, 127.12, 122.51, 118.36, 111.91, 111.80, 101.64, 64.31, 55.94, 40.94, 30.87, 30.58, 19.01, 13.63. HRMS (ESI)  $m/z$ : calculated for  $\text{C}_{25}\text{H}_{28}\text{N}_2\text{O}_4\text{Na}$   $[\text{M}+\text{Na}]^+$ : 443.1947, found 443.1957.

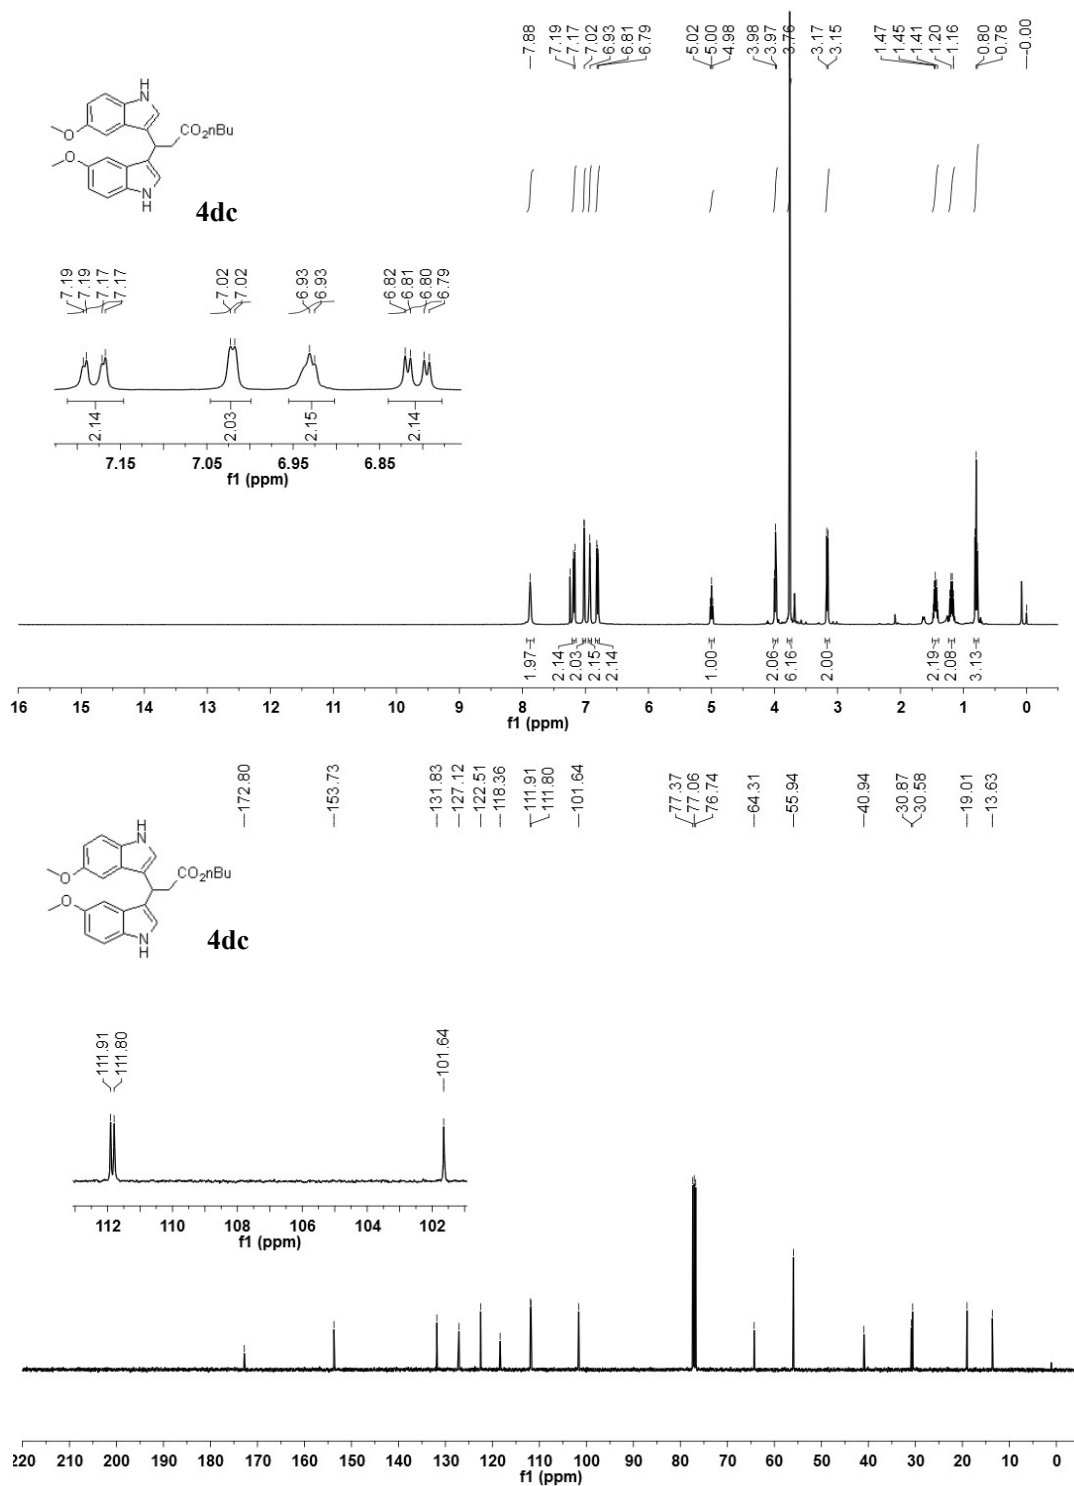

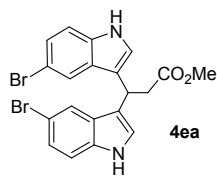

**methyl 3,3-bis(5-bromo-1H-indol-3-yl)propanoate (4ea):** Yield 61%;  $^1\text{H}$  NMR (400 MHz,  $\text{CDCl}_3$ )  $\delta$  8.10 (s, 2H), 7.62 (d,  $J = 1.6$  Hz, 2H), 7.21 (dd,  $J_1 = 8.6$  Hz,  $J_2 = 1.8$  Hz, 2H), 7.15 (d,  $J = 8.6$  Hz, 2H), 6.95 (d,  $J = 2.2$  Hz, 2H), 4.96 (t,  $J = 7.7$  Hz, 1H), 3.60 (s, 3H), 3.13 (d,  $J = 7.7$  Hz, 2H).  $^{13}\text{C}$  NMR (100 MHz,  $\text{CDCl}_3$ )  $\delta$  172.76, 135.28, 128.17, 124.99, 122.93, 121.85, 117.74, 112.78, 112.65, 51.83, 40.63, 30.70.

112.65, 51.83, 40.63, 30.70.

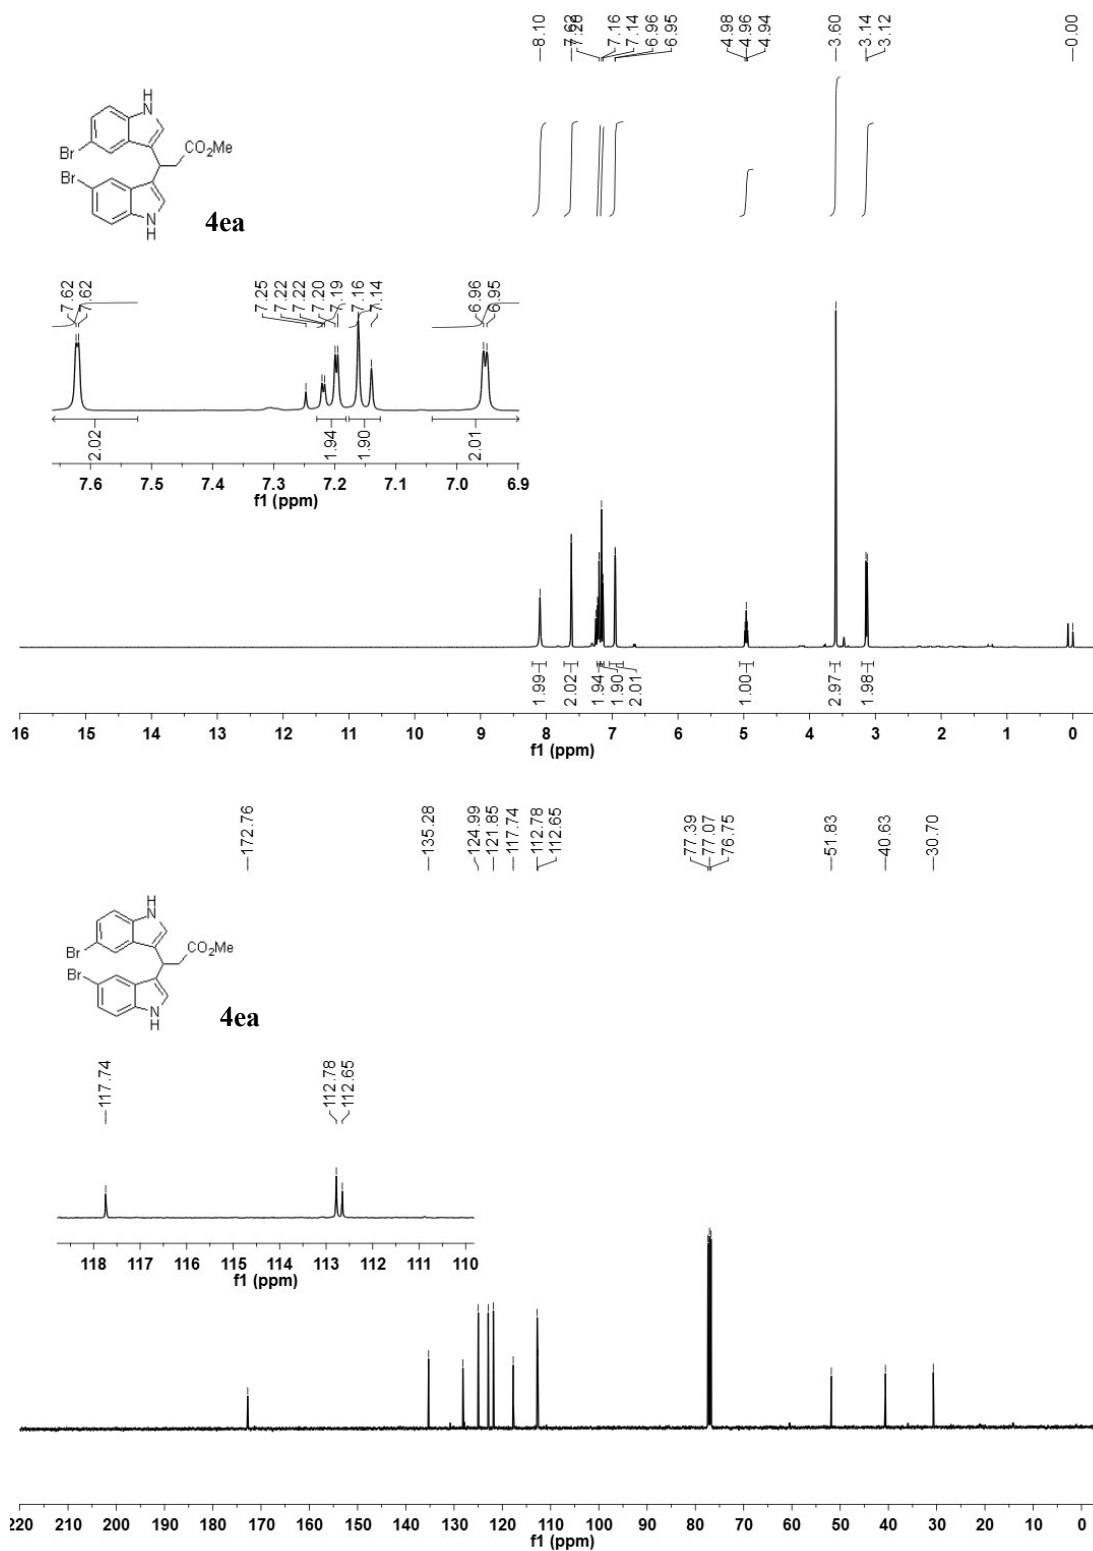

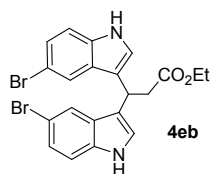

**ethyl 3,3-bis(5-bromo-1H-indol-3-yl)propanoate (4eb):** Yield 75%;  $^1\text{H}$  NMR (400 MHz,  $\text{CDCl}_3$ )  $\delta$  8.12 (s, 2H), 7.63 (d,  $J = 1.6$  Hz, 2H), 7.20 (dd,  $J_1 = 8.6$  Hz,  $J_2 = 1.8$  Hz, 2H), 7.14 (d,  $J = 8.6$  Hz, 2H), 6.95 (d,  $J = 2.2$  Hz, 2H), 4.95 (t,  $J = 7.7$  Hz, 1H), 4.05 (q,  $J = 7.1$  Hz, 2H), 3.12 (d,  $J = 7.7$  Hz, 2H), 1.13 (t,  $J = 7.1$  Hz, 3H).  $^{13}\text{C}$  NMR (100 MHz,  $\text{CDCl}_3$ )  $\delta$  172.36, 135.27, 128.21, 124.94, 122.94,

121.87, 117.79, 112.76, 112.61, 60.65, 40.92, 30.73, 14.11. HRMS (ESI)  $m/z$ : calculated for  $\text{C}_{21}\text{H}_{18}\text{N}_2\text{Br}_2\text{O}_2\text{Na}$   $[\text{M}+\text{Na}]^+$ : 510.9633, found 510.9611.

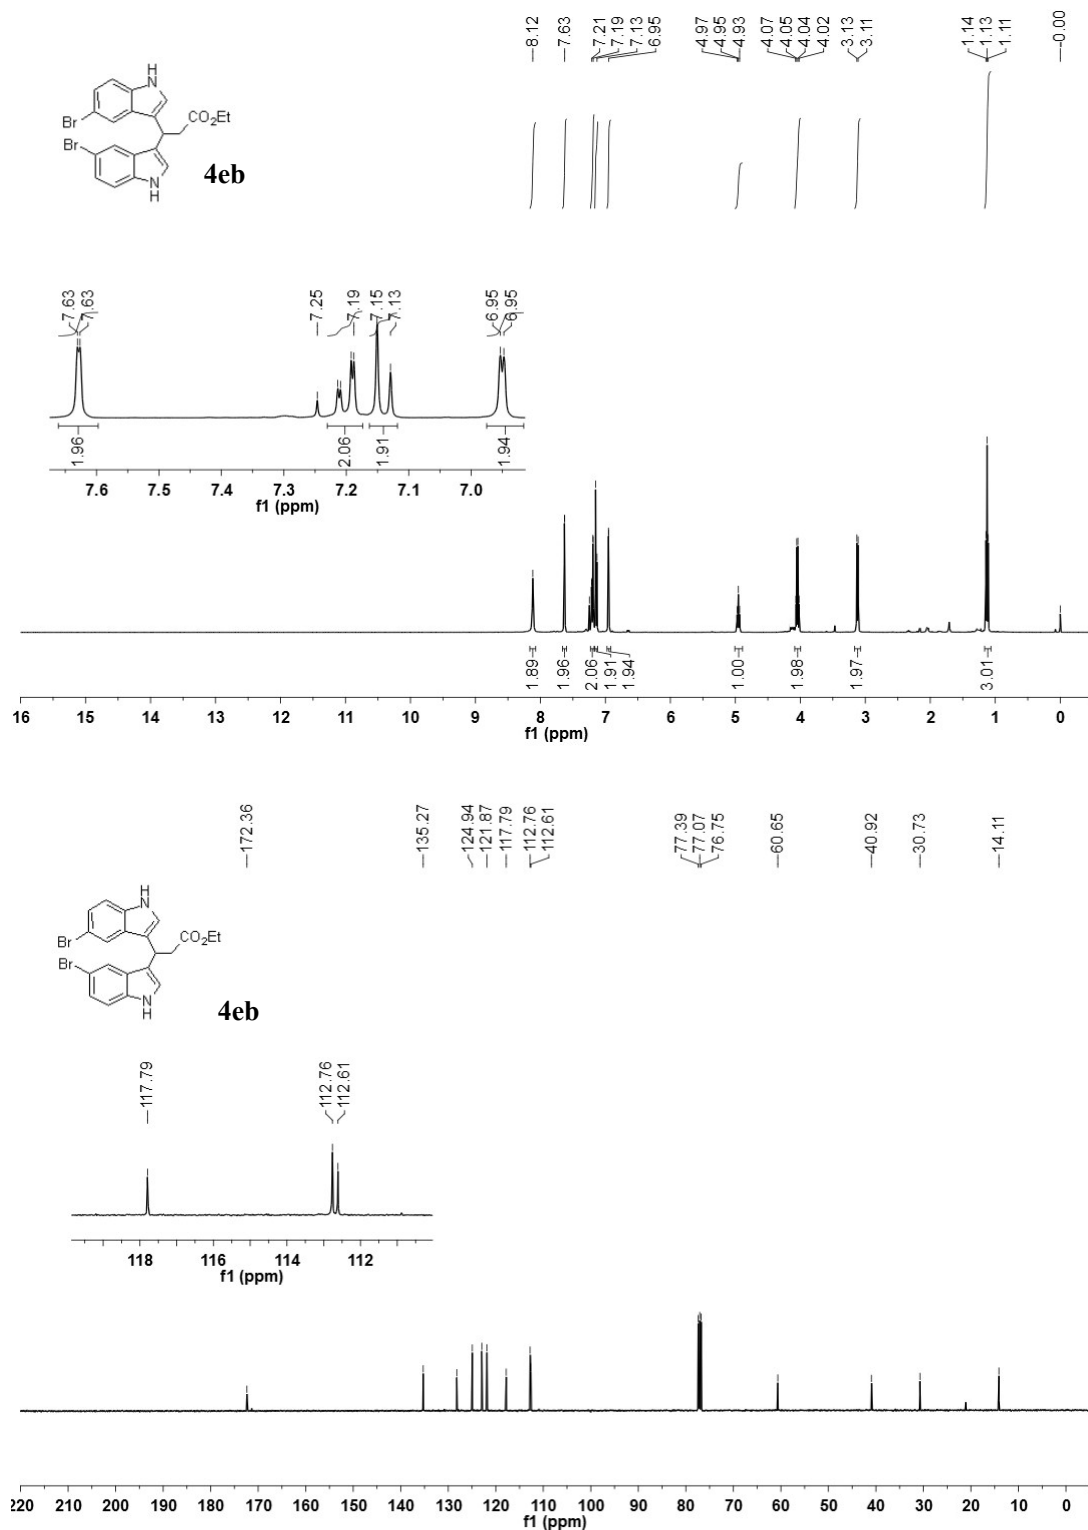

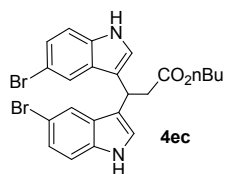

**butyl 3,3-bis(5-bromo-1H-indol-3-yl)propanoate (4ec):** Yield 75%;  $^1\text{H}$  NMR (400 MHz,  $\text{CDCl}_3$ )  $\delta$  8.09 (s, 2H), 7.63 (d,  $J = 1.6$  Hz, 2H), 7.20 (dd,  $J_1 = 8.6$  Hz,  $J_2 = 1.8$  Hz, 2H), 7.14 (d,  $J = 8.6$  Hz, 2H), 6.95 (d,  $J = 2.2$  Hz, 2H), 4.95 (t,  $J = 7.7$  Hz, 1H), 3.99 (t,  $J = 6.6$  Hz, 2H), 3.13 (d,  $J = 7.8$  Hz, 2H), 1.47 (q,  $J = 6.7$  Hz, 2H), 1.24 – 1.14 (m, 2H), 0.80 (t,  $J = 7.4$  Hz, 3H).  $^{13}\text{C}$  NMR (101 MHz,  $\text{CDCl}_3$ )  $\delta$  172.46, 135.27, 128.20, 124.96, 122.93, 121.86, 117.80, 112.75, 112.64, 64.57, 40.96, 30.79, 30.54, 19.02, 13.64. HRMS (ESI)  $m/z$ : calculated for  $\text{C}_{23}\text{H}_{22}\text{N}_2\text{Br}_2\text{O}_2\text{Na}$   $[\text{M}+\text{Na}]^+$ : 538.9946, found 538.9921.

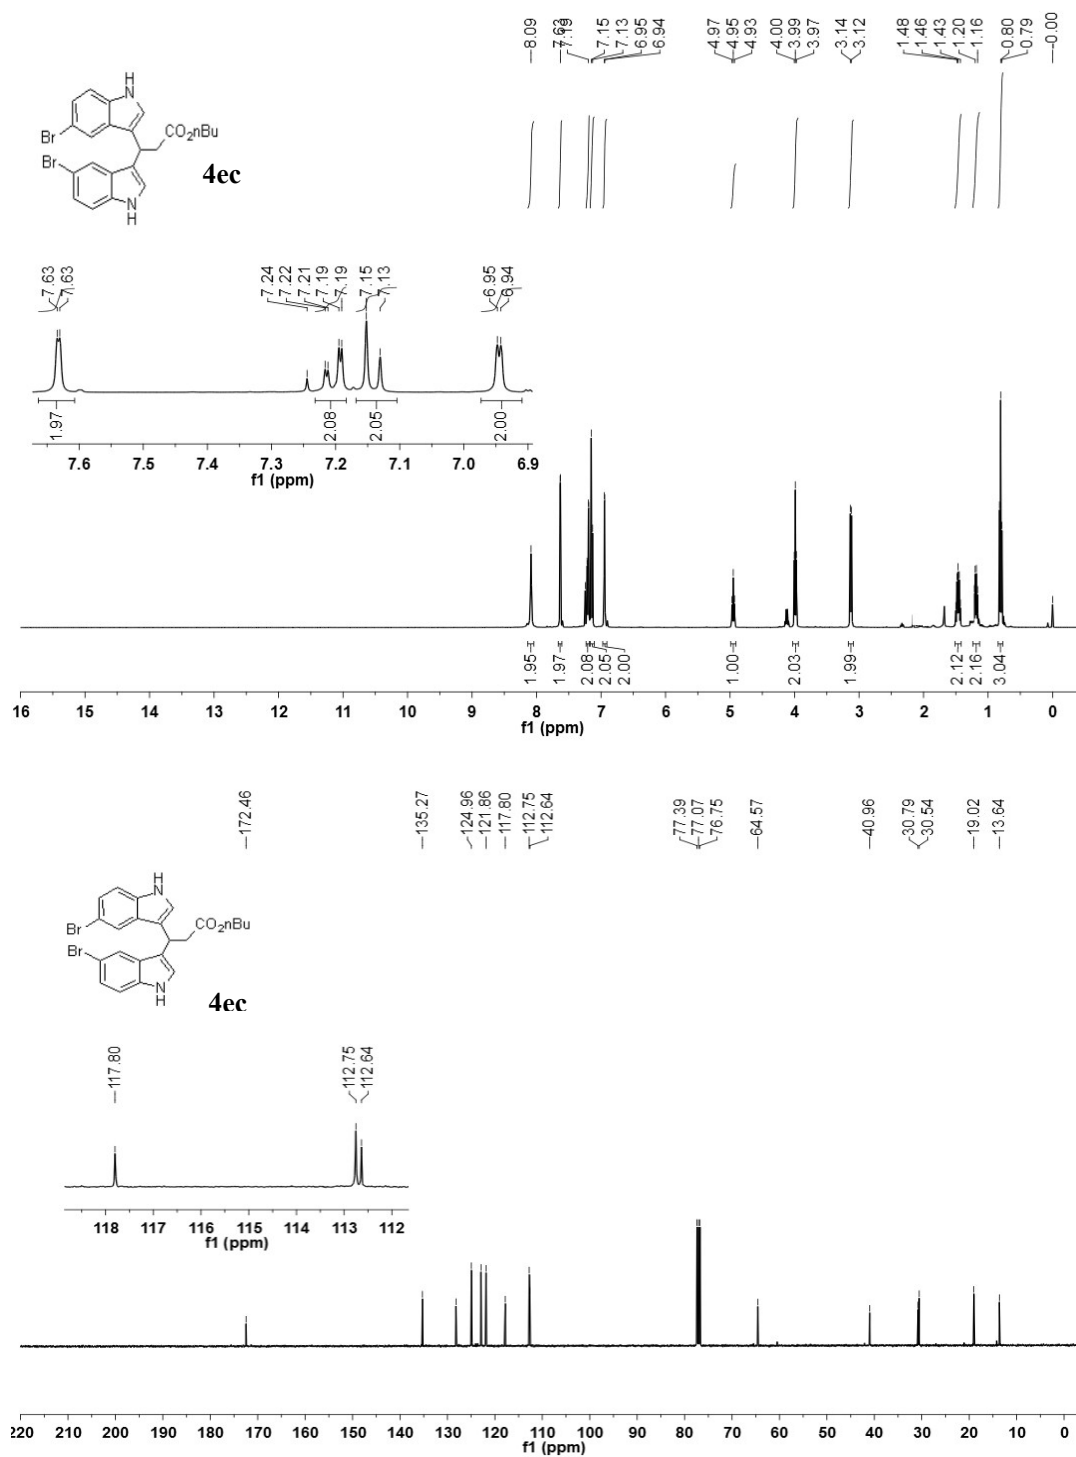

## References

- [1] L. Zhang, C. Peng, D. Zhao, Y. Wang, H. Fu, Q. Shen, J. Li, *Chem. Commun.* **2012**, 48, 5928.
- [2] C. Shao, G. Shi, Y. Zhang, S. Pan, X. Guan, *Org. Lett.* **2015**, 17, 2652.

### Optimized structures for all stationary points

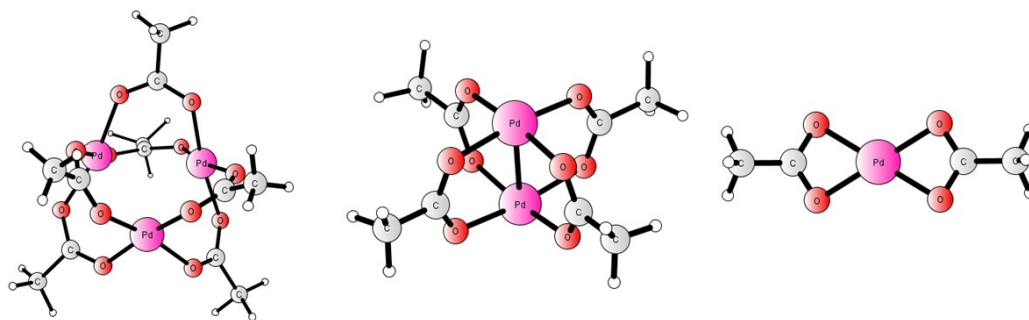

Figure S6. Optimized structures of the trimer, dimer, and monomer of palladium acetate.



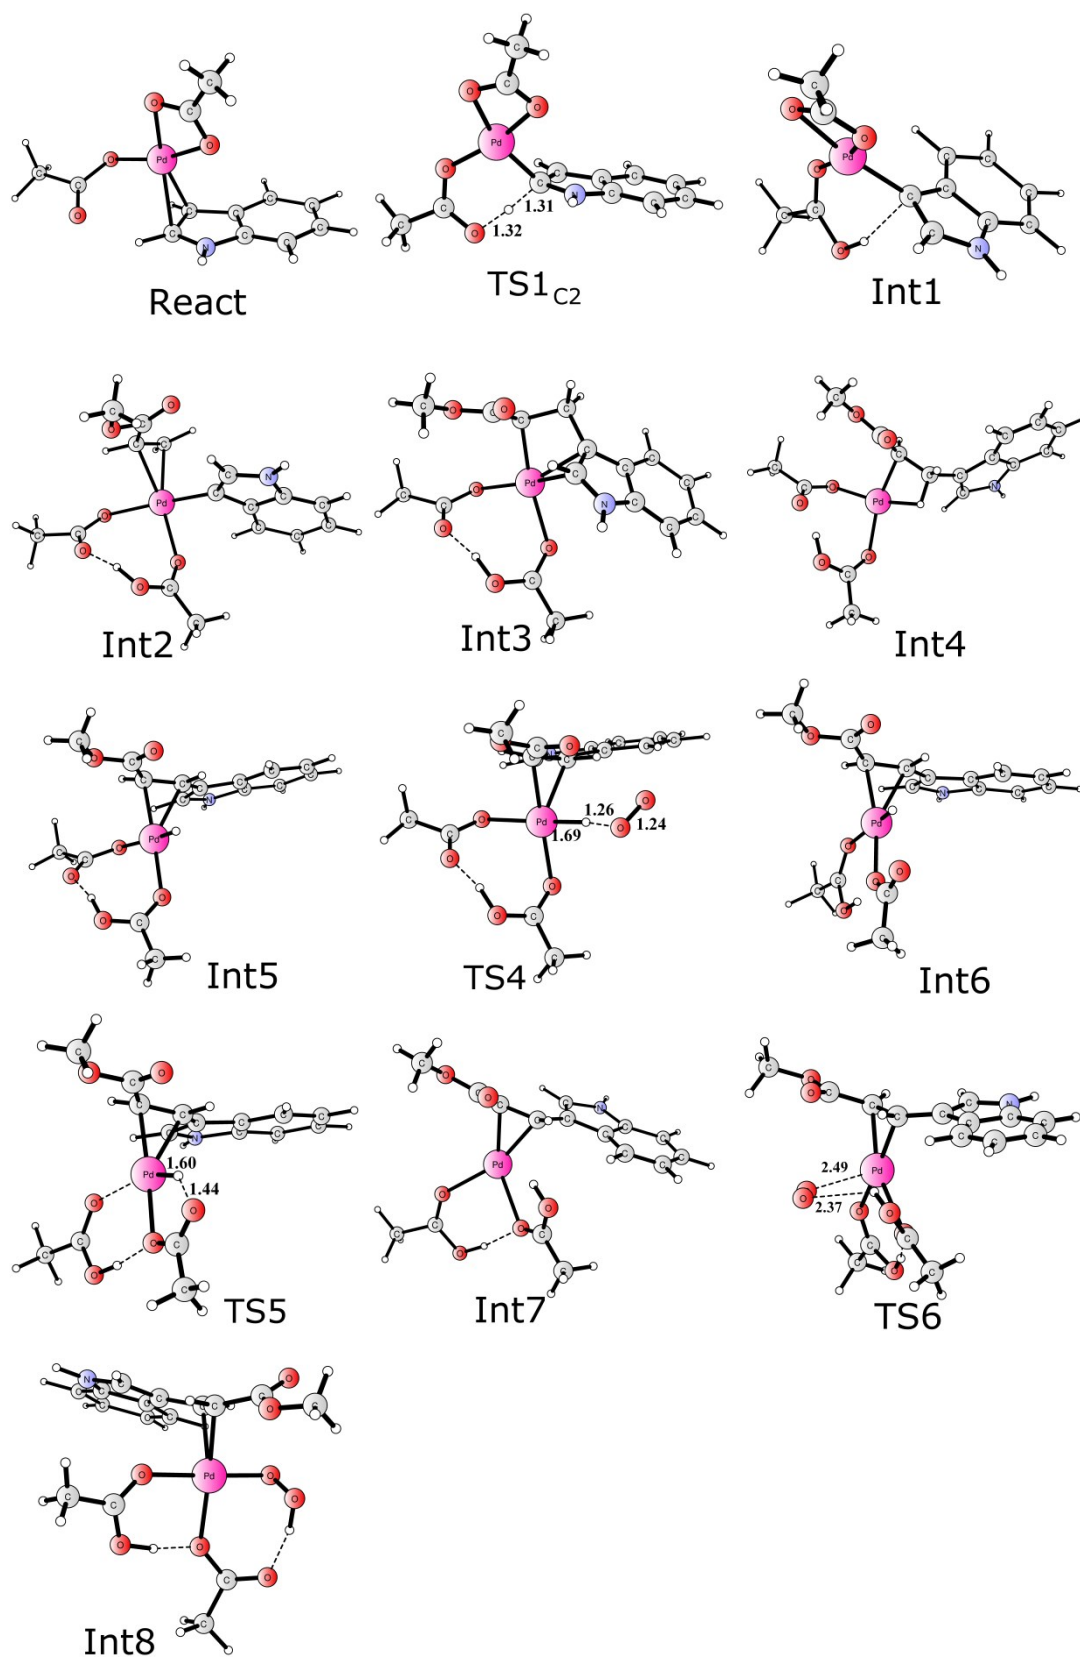

Figure S7. Optimized structures of the reactant, transition states, and intermediates for the Pd(OAc)<sub>2</sub>-catalyzed oxidative coupling of indole with methyl acrylate.

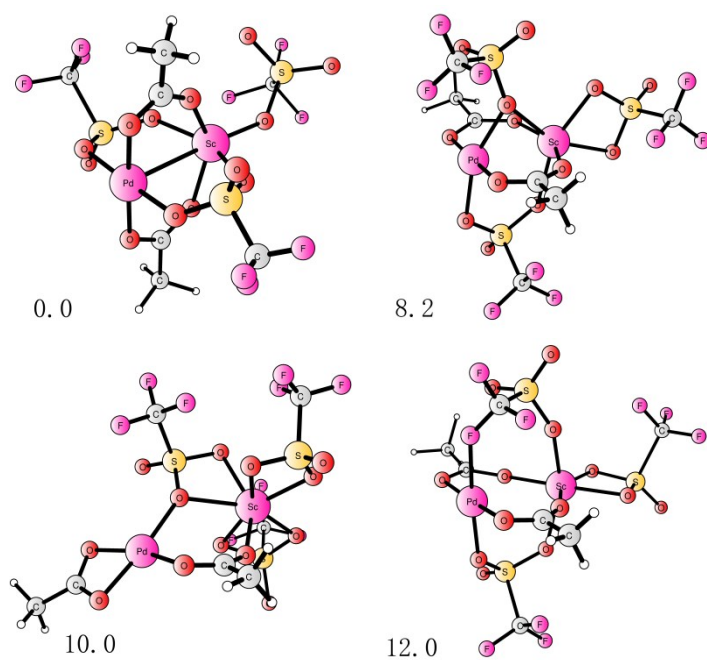

Figure S8. Optimized structures of possible isomers of  $\text{Pd}(\text{OAc})_2/\text{Sc}(\text{OTf})_3$ . Relative energies are given in kcal/mol.

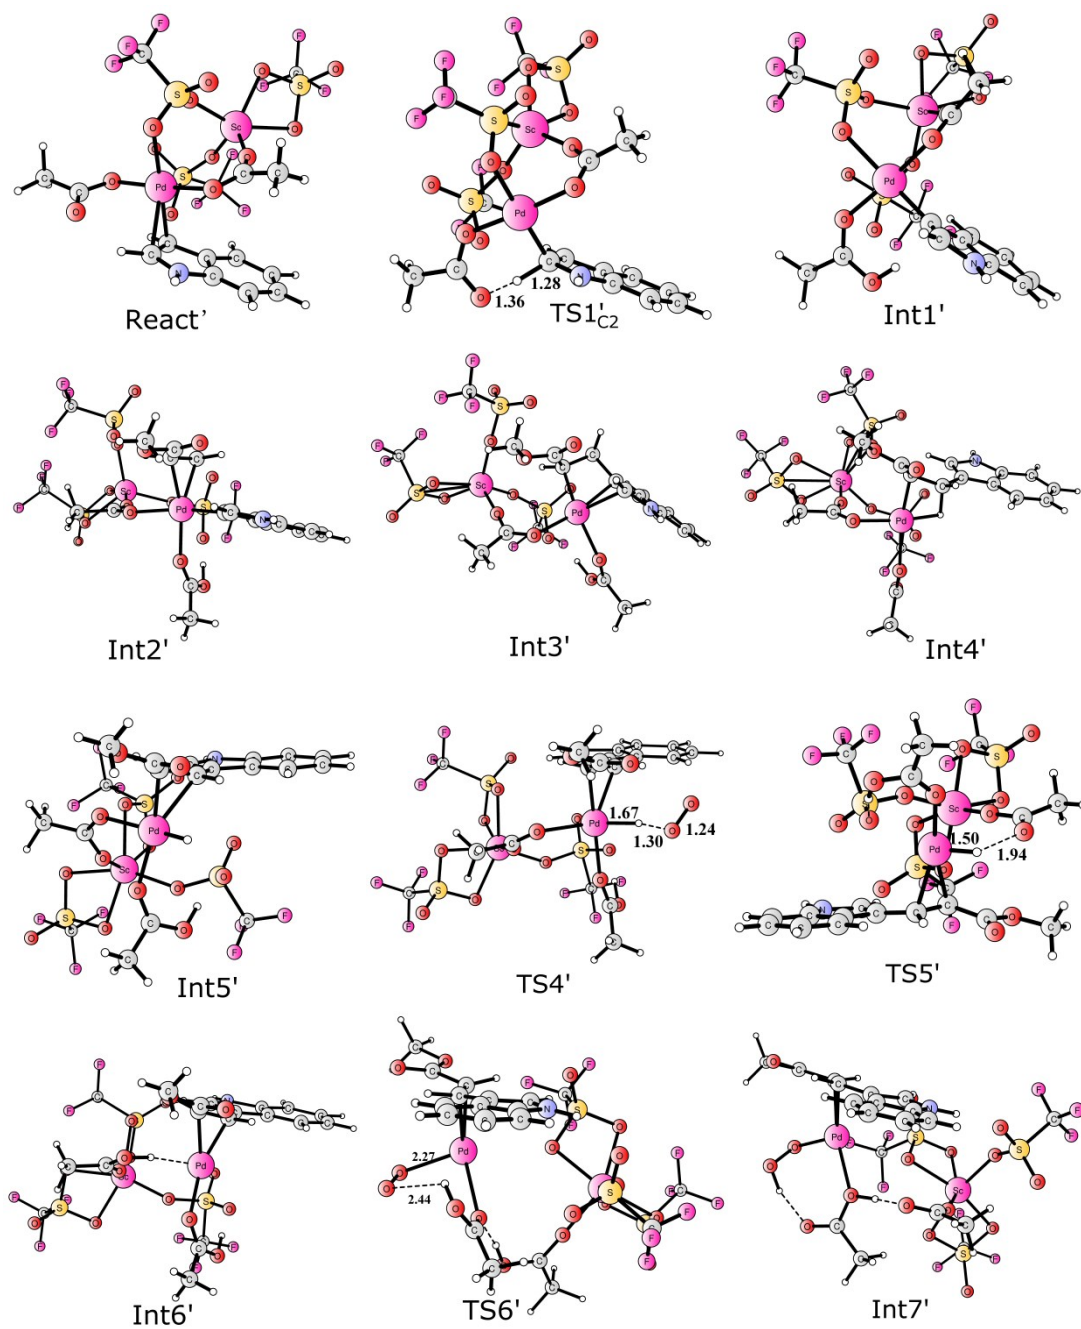

Figure S9. Optimized structures of the reactant, transition states, and intermediates for the Pd(OAc)<sub>2</sub>/Sc(OTf)<sub>3</sub>-catalyzed oxidative coupling of indole with methyl acrylate.

## Cartesian coordinates for all stationary points

The electronic energies obtained from (SMD-B3LYP/def2-TZVPPD) are given below.

Pd<sub>3</sub>(OAc)<sub>6</sub> E=-1755.674784

| Center Number | Atomic Number | Atomic Type | Coordinates (Angstroms) |           |           |
|---------------|---------------|-------------|-------------------------|-----------|-----------|
|               |               |             | X                       | Y         | Z         |
| 1             | 46            | 0           | -0.961810               | 1.410288  | -0.041845 |
| 2             | 8             | 0           | 2.163266                | 1.563641  | -1.314773 |
| 3             | 8             | 0           | -2.152412               | 1.159231  | 1.569955  |
| 4             | 6             | 0           | 1.240732                | 2.148463  | -1.932169 |
| 5             | 8             | 0           | -0.011172               | 2.027156  | -1.701789 |
| 6             | 6             | 0           | -2.724954               | 0.063842  | 1.846929  |
| 7             | 8             | 0           | -2.477107               | -1.034777 | 1.265378  |
| 8             | 6             | 0           | 1.616070                | 3.101077  | -3.036799 |
| 9             | 1             | 0           | 1.623327                | 4.122148  | -2.620811 |
| 10            | 1             | 0           | 2.616126                | 2.865206  | -3.420426 |
| 11            | 1             | 0           | 0.865697                | 3.071235  | -3.837848 |
| 12            | 6             | 0           | -3.744692               | 0.054772  | 2.948588  |
| 13            | 1             | 0           | -4.553258               | -0.647586 | 2.704203  |
| 14            | 1             | 0           | -3.253513               | -0.303760 | 3.868074  |
| 15            | 1             | 0           | -4.136463               | 1.064735  | 3.120705  |
| 16            | 46            | 0           | -0.920041               | -1.434949 | 0.035634  |
| 17            | 8             | 0           | 0.234383                | 2.461117  | 1.193011  |
| 18            | 8             | 0           | -2.115202               | -1.221151 | -1.577413 |
| 19            | 6             | 0           | 1.340681                | 2.254031  | 1.791597  |
| 20            | 8             | 0           | 2.126485                | 1.299282  | 1.568104  |
| 21            | 6             | 0           | -2.716343               | -0.142246 | -1.858341 |
| 22            | 8             | 0           | -2.501289               | 0.963689  | -1.277508 |
| 23            | 6             | 0           | 1.703485                | 3.242753  | 2.868218  |
| 24            | 1             | 0           | 2.755247                | 3.126427  | 3.155414  |
| 25            | 1             | 0           | 1.504198                | 4.265362  | 2.518164  |
| 26            | 1             | 0           | 1.058474                | 3.061389  | 3.742846  |
| 27            | 6             | 0           | -3.730713               | -0.163263 | -2.964721 |
| 28            | 1             | 0           | -4.550108               | 0.531469  | -2.735597 |
| 29            | 1             | 0           | -3.238827               | 0.186786  | -3.887158 |
| 30            | 1             | 0           | -4.107139               | -1.181222 | -3.123899 |
| 31            | 46            | 0           | 2.029094                | 0.030826  | 0.000330  |
| 32            | 8             | 0           | 2.205576                | -1.498255 | 1.315180  |
| 33            | 8             | 0           | 2.165266                | -1.233442 | -1.567618 |
| 34            | 6             | 0           | 1.412475                | -2.215964 | -1.787525 |
| 35            | 8             | 0           | 0.306676                | -2.450504 | -1.199537 |
| 36            | 6             | 0           | 1.298188                | -2.106171 | 1.932980  |
| 37            | 8             | 0           | 0.044049                | -2.019464 | 1.699826  |
| 38            | 6             | 0           | 1.697180                | -3.044572 | 3.041507  |
| 39            | 1             | 0           | 2.694840                | -2.788258 | 3.418073  |
| 40            | 1             | 0           | 0.950828                | -3.022311 | 3.846662  |
| 41            | 1             | 0           | 1.719216                | -4.068470 | 2.633130  |
| 42            | 6             | 0           | 1.851518                | -3.230114 | -2.810786 |
| 43            | 1             | 0           | 2.360009                | -4.052737 | -2.281371 |
| 44            | 1             | 0           | 0.984429                | -3.647187 | -3.338840 |
| 45            | 1             | 0           | 2.563825                | -2.774625 | -3.510201 |

Pd<sub>2</sub>(OAc)<sub>4</sub> E=-1170.421434

| Center Number | Atomic Number | Atomic Type | Coordinates (Angstroms) |           |           |
|---------------|---------------|-------------|-------------------------|-----------|-----------|
|               |               |             | X                       | Y         | Z         |
| 1             | 46            | 0           | -0.000933               | -0.000088 | 1.309901  |
| 2             | 8             | 0           | -1.445749               | 1.447918  | -1.136712 |
| 3             | 8             | 0           | 1.444900                | -1.448285 | 1.136358  |

|    |    |   |           |           |           |
|----|----|---|-----------|-----------|-----------|
| 4  | 6  | 0 | -1.847666 | 1.844981  | -0.000255 |
| 5  | 8  | 0 | -1.446798 | 1.447902  | 1.136786  |
| 6  | 6  | 0 | 1.847546  | -1.845000 | -0.000167 |
| 7  | 8  | 0 | 1.447645  | -1.447339 | -1.137151 |
| 8  | 6  | 0 | -2.948493 | 2.881923  | 0.000966  |
| 9  | 1  | 0 | -2.862500 | 3.527832  | 0.884533  |
| 10 | 1  | 0 | -2.921275 | 3.471946  | -0.923989 |
| 11 | 1  | 0 | -3.917753 | 2.359485  | 0.052092  |
| 12 | 6  | 0 | 2.947512  | -2.882832 | 0.003381  |
| 13 | 1  | 0 | 2.940689  | -3.454192 | -0.933441 |
| 14 | 1  | 0 | 3.915581  | -2.362721 | 0.088974  |
| 15 | 1  | 0 | 2.841151  | -3.546295 | 0.871753  |
| 16 | 46 | 0 | 0.001014  | 0.000235  | -1.309909 |
| 17 | 8  | 0 | 1.445613  | 1.447879  | 1.136828  |
| 18 | 8  | 0 | -1.444712 | -1.448140 | -1.136490 |
| 19 | 6  | 0 | 1.847437  | 1.845292  | 0.000470  |
| 20 | 8  | 0 | 1.446571  | 1.448475  | -1.136671 |
| 21 | 6  | 0 | -1.847275 | -1.845193 | -0.000067 |
| 22 | 8  | 0 | -1.447390 | -1.447768 | 1.137017  |
| 23 | 6  | 0 | 2.948158  | 2.882350  | -0.000560 |
| 24 | 1  | 0 | 2.861798  | 3.528706  | -0.883766 |
| 25 | 1  | 0 | 2.921189  | 3.471897  | 0.924704  |
| 26 | 1  | 0 | 3.917452  | 2.360037  | -0.052315 |
| 27 | 6  | 0 | -2.947643 | -2.882598 | -0.003743 |
| 28 | 1  | 0 | -2.939660 | -3.455427 | 0.932182  |
| 29 | 1  | 0 | -3.915658 | -2.361984 | -0.086920 |
| 30 | 1  | 0 | -2.842835 | -3.544715 | -0.873315 |

Pd(OAc)<sub>2</sub> E=-585.1844957

| Center<br>Number | Atomic<br>Number | Atomic<br>Type | Coordinates (Angstroms) |           |           |
|------------------|------------------|----------------|-------------------------|-----------|-----------|
|                  |                  |                | X                       | Y         | Z         |
| 1                | 46               | 0              | 0.000001                | 0.000058  | -0.010130 |
| 2                | 8                | 0              | -1.762221               | -1.082066 | -0.010266 |
| 3                | 8                | 0              | 1.762197                | -1.082108 | -0.010248 |
| 4                | 6                | 0              | -2.433764               | 0.000113  | -0.005025 |
| 5                | 8                | 0              | -1.762215               | 1.082238  | -0.010243 |
| 6                | 6                | 0              | 2.433761                | 0.000050  | -0.005000 |
| 7                | 8                | 0              | 1.762237                | 1.082196  | -0.010223 |
| 8                | 6                | 0              | -3.928374               | -0.000094 | 0.037579  |
| 9                | 1                | 0              | -4.321579               | 0.911020  | -0.432957 |
| 10               | 1                | 0              | -4.321494               | -0.898878 | -0.456397 |
| 11               | 1                | 0              | -4.253008               | -0.014664 | 1.090969  |
| 12               | 6                | 0              | 3.928373                | -0.000124 | 0.037561  |
| 13               | 1                | 0              | 4.321566                | 0.908944  | -0.436967 |
| 14               | 1                | 0              | 4.253062                | -0.009803 | 1.090988  |
| 15               | 1                | 0              | 4.321459                | -0.901025 | -0.452534 |

indole E=-363.983575

| Center<br>Number | Atomic<br>Number | Atomic<br>Type | Coordinates (Angstroms) |           |           |
|------------------|------------------|----------------|-------------------------|-----------|-----------|
|                  |                  |                | X                       | Y         | Z         |
| 1                | 6                | 0              | 0.251522                | -0.673191 | -0.000051 |
| 2                | 6                | 0              | 0.250435                | 0.753760  | -0.000064 |
| 3                | 6                | 0              | -0.985200               | 1.431183  | -0.000011 |
| 4                | 6                | 0              | -2.163246               | 0.691711  | 0.000009  |
| 5                | 6                | 0              | -2.138373               | -0.720921 | 0.000037  |
| 6                | 6                | 0              | -0.934929               | -1.420694 | 0.000018  |
| 7                | 6                | 0              | 2.391719                | 0.027926  | 0.000033  |
| 8                | 6                | 0              | 1.627875                | 1.170006  | 0.000038  |
| 9                | 7                | 0              | 1.568547                | -1.080746 | -0.000038 |

|    |   |   |           |           |           |
|----|---|---|-----------|-----------|-----------|
| 10 | 1 | 0 | 2.004656  | 2.190724  | 0.000082  |
| 11 | 1 | 0 | 3.474321  | -0.086851 | 0.000049  |
| 12 | 1 | 0 | 1.883056  | -2.041265 | 0.000123  |
| 13 | 1 | 0 | -0.917937 | -2.513736 | -0.000071 |
| 14 | 1 | 0 | -3.080891 | -1.274374 | 0.000067  |
| 15 | 1 | 0 | -3.126586 | 1.208009  | 0.000044  |
| 16 | 1 | 0 | -1.015269 | 2.524035  | -0.000074 |

React E=-949.1890647

| Center Number | Atomic Number | Atomic Type | Coordinates (Angstroms) |           |           |
|---------------|---------------|-------------|-------------------------|-----------|-----------|
|               |               |             | X                       | Y         | Z         |
| 1             | 6             | 0           | 2.319820                | -0.914349 | 0.821778  |
| 2             | 6             | 0           | 1.822930                | -1.228496 | -0.468563 |
| 3             | 6             | 0           | 2.696730                | -1.222357 | -1.565723 |
| 4             | 6             | 0           | 4.035049                | -0.895481 | -1.353908 |
| 5             | 6             | 0           | 4.505687                | -0.569707 | -0.066360 |
| 6             | 6             | 0           | 3.656896                | -0.571196 | 1.040494  |
| 7             | 6             | 0           | 0.119487                | -1.384285 | 1.069342  |
| 8             | 6             | 0           | 0.399808                | -1.501402 | -0.318019 |
| 9             | 7             | 0           | 1.267474                | -1.038041 | 1.722850  |
| 10            | 46            | 0           | -0.775707               | 0.359473  | -0.177495 |
| 11            | 8             | 0           | 0.610398                | 1.826953  | 0.294238  |
| 12            | 8             | 0           | -2.368722               | -0.681438 | -0.785709 |
| 13            | 6             | 0           | -3.137194               | -1.308492 | 0.068730  |
| 14            | 8             | 0           | -2.877226               | -1.511531 | 1.248347  |
| 15            | 6             | 0           | -0.231276               | 2.763959  | 0.060379  |
| 16            | 8             | 0           | -1.400429               | 2.436585  | -0.289593 |
| 17            | 6             | 0           | 0.185788                | 4.201146  | 0.169320  |
| 18            | 6             | 0           | -4.443224               | -1.773703 | -0.559821 |
| 19            | 1             | 0           | -0.219393               | -2.051548 | -1.025282 |
| 20            | 1             | 0           | -0.804513               | -1.650607 | 1.589888  |
| 21            | 1             | 0           | 1.308588                | -0.779696 | 2.700962  |
| 22            | 1             | 0           | 4.026268                | -0.318651 | 2.036890  |
| 23            | 1             | 0           | 5.558839                | -0.311415 | 0.069239  |
| 24            | 1             | 0           | 4.730842                | -0.886943 | -2.196045 |
| 25            | 1             | 0           | 2.331463                | -1.465777 | -2.566259 |
| 26            | 1             | 0           | -4.255261               | -2.275835 | -1.520242 |
| 27            | 1             | 0           | -4.969363               | -2.445824 | 0.130043  |
| 28            | 1             | 0           | -5.074608               | -0.895620 | -0.769427 |
| 29            | 1             | 0           | 0.990566                | 4.312492  | 0.908616  |
| 30            | 1             | 0           | 0.568768                | 4.533759  | -0.809406 |
| 31            | 1             | 0           | -0.677175               | 4.827841  | 0.431682  |

TS1 E=-949.1615658

| Center Number | Atomic Number | Atomic Type | Coordinates (Angstroms) |           |           |
|---------------|---------------|-------------|-------------------------|-----------|-----------|
|               |               |             | X                       | Y         | Z         |
| 1             | 6             | 0           | 2.929232                | -0.154951 | 0.738607  |
| 2             | 6             | 0           | 1.873663                | -0.311864 | -0.194906 |
| 3             | 6             | 0           | 2.152460                | -0.135314 | -1.559290 |
| 4             | 6             | 0           | 3.452431                | 0.183625  | -1.948892 |
| 5             | 6             | 0           | 4.484825                | 0.328412  | -1.000032 |
| 6             | 6             | 0           | 4.238644                | 0.159373  | 0.361841  |
| 7             | 6             | 0           | 1.068360                | -0.662124 | 1.893616  |
| 8             | 6             | 0           | 0.658346                | -0.662384 | 0.548867  |
| 9             | 7             | 0           | 2.388338                | -0.376357 | 2.003317  |
| 10            | 46            | 0           | -1.143836               | 0.247008  | 0.085263  |
| 11            | 8             | 0           | -0.511554               | 2.201479  | 0.263213  |
| 12            | 8             | 0           | -2.195365               | -1.470297 | -0.208737 |
| 13            | 6             | 0           | -1.717391               | -2.641304 | -0.248361 |

|    |   |   |           |           |           |
|----|---|---|-----------|-----------|-----------|
| 14 | 8 | 0 | -0.506931 | -2.931606 | -0.039351 |
| 15 | 6 | 0 | -1.663482 | 2.661172  | -0.058626 |
| 16 | 8 | 0 | -2.590928 | 1.841750  | -0.304284 |
| 17 | 6 | 0 | -1.868382 | 4.146571  | -0.158389 |
| 18 | 6 | 0 | -2.668674 | -3.765440 | -0.594375 |
| 19 | 1 | 0 | 0.110779  | -1.826456 | 0.245432  |
| 20 | 1 | 0 | 0.477397  | -0.880502 | 2.783089  |
| 21 | 1 | 0 | 2.913525  | -0.361287 | 2.869634  |
| 22 | 1 | 0 | 5.037251  | 0.269263  | 1.099785  |
| 23 | 1 | 0 | 5.494267  | 0.577566  | -1.336276 |
| 24 | 1 | 0 | 3.679031  | 0.326073  | -3.008434 |
| 25 | 1 | 0 | 1.356155  | -0.240526 | -2.300023 |
| 26 | 1 | 0 | -2.480535 | -4.073277 | -1.635634 |
| 27 | 1 | 0 | -2.468098 | -4.634186 | 0.048194  |
| 28 | 1 | 0 | -3.711373 | -3.439229 | -0.499079 |
| 29 | 1 | 0 | -1.405897 | 4.649950  | 0.703048  |
| 30 | 1 | 0 | -1.367473 | 4.517653  | -1.067043 |
| 31 | 1 | 0 | -2.938915 | 4.381835  | -0.215092 |

Int1 E=-949.1740697

| Center<br>Number | Atomic<br>Number | Atomic<br>Type | Coordinates (Angstroms) |           |           |
|------------------|------------------|----------------|-------------------------|-----------|-----------|
|                  |                  |                | X                       | Y         | Z         |
| 1                | 6                | 0              | 2.698640                | 1.437021  | 0.484009  |
| 2                | 6                | 0              | 1.785173                | 0.609488  | -0.236360 |
| 3                | 6                | 0              | 2.232882                | -0.024610 | -1.412573 |
| 4                | 6                | 0              | 3.546832                | 0.164308  | -1.830067 |
| 5                | 6                | 0              | 4.435122                | 0.980554  | -1.095487 |
| 6                | 6                | 0              | 4.024185                | 1.626132  | 0.067470  |
| 7                | 6                | 0              | 0.724905                | 1.467137  | 1.567946  |
| 8                | 6                | 0              | 0.522774                | 0.633452  | 0.481933  |
| 9                | 7                | 0              | 2.022185                | 1.943509  | 1.572626  |
| 10               | 46               | 0              | -1.216163               | -0.140448 | -0.075828 |
| 11               | 8                | 0              | -2.367590               | 1.546056  | 0.088422  |
| 12               | 8                | 0              | -0.404933               | -2.048756 | -0.317964 |
| 13               | 6                | 0              | 0.357462                | -2.640451 | 0.454884  |
| 14               | 8                | 0              | 0.954287                | -2.066441 | 1.467223  |
| 15               | 6                | 0              | -3.434835               | 0.957400  | -0.320406 |
| 16               | 8                | 0              | -3.387553               | -0.266559 | -0.601603 |
| 17               | 6                | 0              | -4.694570               | 1.765822  | -0.474540 |
| 18               | 6                | 0              | 0.677606                | -4.094303 | 0.276163  |
| 19               | 1                | 0              | 0.789132                | -1.080798 | 1.422112  |
| 20               | 1                | 0              | 0.019550                | 1.783586  | 2.334751  |
| 21               | 1                | 0              | 2.417309                | 2.556681  | 2.273064  |
| 22               | 1                | 0              | 4.711348                | 2.261104  | 0.633054  |
| 23               | 1                | 0              | 5.461367                | 1.111631  | -1.448020 |
| 24               | 1                | 0              | 3.899250                | -0.319861 | -2.744432 |
| 25               | 1                | 0              | 1.547508                | -0.648598 | -1.991731 |
| 26               | 1                | 0              | 1.719558                | -4.185896 | -0.070707 |
| 27               | 1                | 0              | 0.606187                | -4.614568 | 1.242331  |
| 28               | 1                | 0              | 0.001998                | -4.544027 | -0.460065 |
| 29               | 1                | 0              | -4.800095               | 2.471683  | 0.361645  |
| 30               | 1                | 0              | -4.628606               | 2.356437  | -1.402737 |
| 31               | 1                | 0              | -5.567038               | 1.102576  | -0.536003 |

Methyl acrylate E=-306.6151856

| Center<br>Number | Atomic<br>Number | Atomic<br>Type | Coordinates (Angstroms) |           |           |
|------------------|------------------|----------------|-------------------------|-----------|-----------|
|                  |                  |                | X                       | Y         | Z         |
| 1                | 6                | 0              | 1.317802                | -0.645999 | -0.000098 |
| 2                | 1                | 0              | 1.237036                | -1.736046 | -0.000233 |

|    |   |   |           |           |           |
|----|---|---|-----------|-----------|-----------|
| 3  | 6 | 0 | 2.496663  | -0.015689 | 0.000135  |
| 4  | 1 | 0 | 2.533502  | 1.077659  | 0.000243  |
| 5  | 1 | 0 | 3.441042  | -0.565615 | 0.000163  |
| 6  | 6 | 0 | 0.041881  | 0.120129  | -0.000089 |
| 7  | 8 | 0 | -0.059021 | 1.324863  | -0.000086 |
| 8  | 8 | 0 | -1.018410 | -0.713572 | -0.000025 |
| 9  | 6 | 0 | -2.303656 | -0.096084 | 0.000098  |
| 10 | 1 | 0 | -2.435655 | 0.535765  | -0.891743 |
| 11 | 1 | 0 | -3.037124 | -0.911956 | 0.000164  |
| 12 | 1 | 0 | -2.435492 | 0.535719  | 0.892007  |

Int2 E=-1255.812253

| Center<br>Number | Atomic<br>Number | Atomic<br>Type | Coordinates (Angstroms) |           |           |
|------------------|------------------|----------------|-------------------------|-----------|-----------|
|                  |                  |                | X                       | Y         | Z         |
| 1                | 6                | 0              | -3.494675               | -0.952610 | 0.427753  |
| 2                | 6                | 0              | -2.543224               | -0.167267 | -0.293506 |
| 3                | 6                | 0              | -3.020044               | 0.819352  | -1.180519 |
| 4                | 6                | 0              | -4.391954               | 0.997952  | -1.329049 |
| 5                | 6                | 0              | -5.313553               | 0.209090  | -0.605405 |
| 6                | 6                | 0              | -4.877710               | -0.772950 | 0.279712  |
| 7                | 6                | 0              | -1.431339               | -1.641391 | 1.015056  |
| 8                | 6                | 0              | -1.230038               | -0.630934 | 0.101839  |
| 9                | 7                | 0              | -2.787813               | -1.833410 | 1.214175  |
| 10               | 46               | 0              | 0.476733                | 0.195530  | -0.514306 |
| 11               | 8                | 0              | 3.011115                | 1.852867  | 0.752020  |
| 12               | 8                | 0              | -0.329282               | 1.977544  | 0.273324  |
| 13               | 6                | 0              | -0.085009               | 2.555539  | 1.352867  |
| 14               | 8                | 0              | 1.008475                | 2.441432  | 2.015406  |
| 15               | 6                | 0              | 3.121375                | 1.696425  | -0.490724 |
| 16               | 8                | 0              | 2.247867                | 1.178356  | -1.250642 |
| 17               | 6                | 0              | 4.411749                | 2.168744  | -1.136704 |
| 18               | 6                | 0              | -1.115055               | 3.491307  | 1.930145  |
| 19               | 1                | 0              | 1.841693                | 2.054406  | 1.436468  |
| 20               | 1                | 0              | -0.715435               | -2.274730 | 1.531024  |
| 21               | 1                | 0              | -3.193054               | -2.519999 | 1.835511  |
| 22               | 1                | 0              | -5.590433               | -1.384621 | 0.839592  |
| 23               | 1                | 0              | -6.385764               | 0.371434  | -0.742664 |
| 24               | 1                | 0              | -4.766287               | 1.761577  | -2.015767 |
| 25               | 1                | 0              | -2.316422               | 1.441406  | -1.738321 |
| 26               | 1                | 0              | -1.055028               | 3.490670  | 3.026871  |
| 27               | 1                | 0              | -0.890504               | 4.513707  | 1.583267  |
| 28               | 1                | 0              | -2.119330               | 3.215020  | 1.586592  |
| 29               | 1                | 0              | 4.482400                | 3.262910  | -1.030166 |
| 30               | 1                | 0              | 5.268014                | 1.740322  | -0.594083 |
| 31               | 1                | 0              | 4.457018                | 1.897489  | -2.198656 |
| 32               | 6                | 0              | 1.616299                | -1.585473 | -1.094074 |
| 33               | 1                | 0              | 2.580844                | -1.114379 | -1.289298 |
| 34               | 6                | 0              | 0.569717                | -1.412969 | -1.986453 |
| 35               | 1                | 0              | -0.312533               | -2.052881 | -1.925740 |
| 36               | 1                | 0              | 0.720840                | -0.839556 | -2.904960 |
| 37               | 6                | 0              | 1.638227                | -2.675528 | -0.070890 |
| 38               | 8                | 0              | 0.802947                | -3.537522 | 0.067898  |
| 39               | 8                | 0              | 2.752470                | -2.585308 | 0.676215  |
| 40               | 6                | 0              | 2.926960                | -3.577661 | 1.687189  |
| 41               | 1                | 0              | 2.898799                | -4.587931 | 1.251881  |
| 42               | 1                | 0              | 3.905559                | -3.381675 | 2.141471  |
| 43               | 1                | 0              | 2.135501                | -3.502374 | 2.448632  |

TS2 E=-1255.802248

| Center | Atomic | Atomic | Coordinates (Angstroms) |  |  |
|--------|--------|--------|-------------------------|--|--|
|--------|--------|--------|-------------------------|--|--|



| Number | Number | Type | X         | Y         | Z         |
|--------|--------|------|-----------|-----------|-----------|
| 1      | 6      | 0    | -3.571394 | -0.781476 | 0.788913  |
| 2      | 6      | 0    | -2.674830 | -0.537171 | -0.293176 |
| 3      | 6      | 0    | -3.205500 | -0.140563 | -1.534902 |
| 4      | 6      | 0    | -4.584232 | -0.007115 | -1.672473 |
| 5      | 6      | 0    | -5.453017 | -0.255782 | -0.587650 |
| 6      | 6      | 0    | -4.959311 | -0.642840 | 0.655907  |
| 7      | 6      | 0    | -1.477177 | -1.149343 | 1.532864  |
| 8      | 6      | 0    | -1.336038 | -0.768545 | 0.208012  |
| 9      | 7      | 0    | -2.808233 | -1.147002 | 1.881669  |
| 10     | 46     | 0    | 0.367532  | 0.059311  | -0.532182 |
| 11     | 8      | 0    | 2.867254  | 1.560302  | 0.680855  |
| 12     | 8      | 0    | -0.511623 | 1.970505  | -0.135580 |
| 13     | 6      | 0    | -0.228044 | 2.767465  | 0.774019  |
| 14     | 8      | 0    | 0.843714  | 2.737626  | 1.493869  |
| 15     | 6      | 0    | 3.031009  | 1.322871  | -0.540921 |
| 16     | 8      | 0    | 2.124652  | 0.906191  | -1.329666 |
| 17     | 6      | 0    | 4.408835  | 1.507847  | -1.148615 |
| 18     | 6      | 0    | -1.175086 | 3.894762  | 1.100828  |
| 19     | 1      | 0    | 1.627169  | 2.114513  | 1.140786  |
| 20     | 1      | 0    | -0.707788 | -1.453983 | 2.240703  |
| 21     | 1      | 0    | -3.171669 | -1.383663 | 2.795588  |
| 22     | 1      | 0    | -5.632127 | -0.831644 | 1.496577  |
| 23     | 1      | 0    | -6.531154 | -0.140648 | -0.724791 |
| 24     | 1      | 0    | -5.004493 | 0.300857  | -2.633127 |
| 25     | 1      | 0    | -2.539058 | 0.069145  | -2.375457 |
| 26     | 1      | 0    | -1.309999 | 3.961293  | 2.190393  |
| 27     | 1      | 0    | -0.725587 | 4.845134  | 0.770827  |
| 28     | 1      | 0    | -2.138122 | 3.747714  | 0.598445  |
| 29     | 1      | 0    | 5.056039  | 2.089166  | -0.479733 |
| 30     | 1      | 0    | 4.851451  | 0.511815  | -1.311367 |
| 31     | 1      | 0    | 4.329669  | 1.994523  | -2.131423 |
| 32     | 6      | 0    | 1.224656  | -1.824810 | -0.911022 |
| 33     | 1      | 0    | 1.732630  | -1.610154 | -1.854705 |
| 34     | 6      | 0    | -0.125543 | -2.232145 | -0.882780 |
| 35     | 1      | 0    | -0.438710 | -2.921989 | -0.103337 |
| 36     | 1      | 0    | -0.704680 | -2.254495 | -1.807172 |
| 37     | 6      | 0    | 2.085536  | -2.169007 | 0.258361  |
| 38     | 8      | 0    | 1.674640  | -2.605115 | 1.313064  |
| 39     | 8      | 0    | 3.381313  | -1.919093 | 0.009293  |
| 40     | 6      | 0    | 4.283545  | -2.082724 | 1.105861  |
| 41     | 1      | 0    | 4.154099  | -3.067064 | 1.578203  |
| 42     | 1      | 0    | 5.293071  | -1.985473 | 0.687929  |
| 43     | 1      | 0    | 4.110377  | -1.296228 | 1.856311  |

Int3 E=-1255.851962

| Center Number | Atomic Number | Atomic Type | Coordinates (Angstroms) |           |           |
|---------------|---------------|-------------|-------------------------|-----------|-----------|
|               |               |             | X                       | Y         | Z         |
| 1             | 6             | 0           | -3.079695               | -0.349830 | 0.764865  |
| 2             | 6             | 0           | -2.564027               | -1.196490 | -0.252829 |
| 3             | 6             | 0           | -3.369209               | -1.514009 | -1.358427 |
| 4             | 6             | 0           | -4.652184               | -0.976710 | -1.432430 |
| 5             | 6             | 0           | -5.140844               | -0.125554 | -0.419984 |
| 6             | 6             | 0           | -4.364322               | 0.201750  | 0.690009  |
| 7             | 6             | 0           | -0.983962               | -0.924685 | 1.382611  |
| 8             | 6             | 0           | -1.212027               | -1.564760 | 0.144456  |
| 9             | 7             | 0           | -2.112118               | -0.228191 | 1.746016  |
| 10            | 46            | 0           | 0.314353                | 0.001639  | -0.359000 |
| 11            | 8             | 0           | 2.731881                | 1.979848  | 0.293130  |
| 12            | 8             | 0           | -0.754841               | 1.890696  | -0.101163 |
| 13            | 6             | 0           | -0.451932               | 2.947097  | 0.473344  |
| 14            | 8             | 0           | 0.710210                | 3.234483  | 0.957263  |

|    |   |   |           |           |           |
|----|---|---|-----------|-----------|-----------|
| 15 | 6 | 0 | 2.836553  | 1.441979  | -0.834184 |
| 16 | 8 | 0 | 1.914667  | 0.795186  | -1.428200 |
| 17 | 6 | 0 | 4.157814  | 1.525817  | -1.574593 |
| 18 | 6 | 0 | -1.485808 | 4.035596  | 0.637443  |
| 19 | 1 | 0 | 1.506092  | 2.578495  | 0.693557  |
| 20 | 1 | 0 | -0.181075 | -1.124976 | 2.091803  |
| 21 | 1 | 0 | -2.173987 | 0.381787  | 2.550396  |
| 22 | 1 | 0 | -4.748844 | 0.856895  | 1.475311  |
| 23 | 1 | 0 | -6.150740 | 0.283345  | -0.505188 |
| 24 | 1 | 0 | -5.290629 | -1.214054 | -2.286531 |
| 25 | 1 | 0 | -2.995145 | -2.167915 | -2.149810 |
| 26 | 1 | 0 | -1.399605 | 4.497964  | 1.631163  |
| 27 | 1 | 0 | -1.285824 | 4.823528  | -0.107037 |
| 28 | 1 | 0 | -2.494200 | 3.637312  | 0.471848  |
| 29 | 1 | 0 | 4.828737  | 2.249893  | -1.095593 |
| 30 | 1 | 0 | 4.622133  | 0.526748  | -1.566229 |
| 31 | 1 | 0 | 3.985786  | 1.795223  | -2.626956 |
| 32 | 6 | 0 | 1.050305  | -1.885777 | -0.606700 |
| 33 | 1 | 0 | 1.511584  | -1.900727 | -1.600601 |
| 34 | 6 | 0 | -0.283983 | -2.615240 | -0.448616 |
| 35 | 1 | 0 | -0.218127 | -3.505809 | 0.198190  |
| 36 | 1 | 0 | -0.667494 | -2.928137 | -1.429311 |
| 37 | 6 | 0 | 2.030378  | -2.109792 | 0.489392  |
| 38 | 8 | 0 | 1.748944  | -2.488917 | 1.612123  |
| 39 | 8 | 0 | 3.295446  | -1.822902 | 0.118938  |
| 40 | 6 | 0 | 4.288739  | -1.917174 | 1.138591  |
| 41 | 1 | 0 | 4.295674  | -2.919874 | 1.591575  |
| 42 | 1 | 0 | 5.249585  | -1.712950 | 0.649721  |
| 43 | 1 | 0 | 4.105420  | -1.175240 | 1.931147  |

Int4 E=-1255.829618

| Center<br>Number | Atomic<br>Number | Atomic<br>Type | Coordinates (Angstroms) |           |           |
|------------------|------------------|----------------|-------------------------|-----------|-----------|
|                  |                  |                | X                       | Y         | Z         |
| 1                | 6                | 0              | 4.531000                | 0.945698  | 0.713999  |
| 2                | 6                | 0              | 3.728547                | 0.167509  | -0.170218 |
| 3                | 6                | 0              | 4.360409                | -0.716527 | -1.066879 |
| 4                | 6                | 0              | 5.748925                | -0.799060 | -1.065085 |
| 5                | 6                | 0              | 6.525985                | -0.017520 | -0.181291 |
| 6                | 6                | 0              | 5.930467                | 0.862222  | 0.717991  |
| 7                | 6                | 0              | 2.373755                | 1.452494  | 1.108076  |
| 8                | 6                | 0              | 2.352490                | 0.509760  | 0.103595  |
| 9                | 7                | 0              | 3.675542                | 1.713131  | 1.475551  |
| 10               | 46               | 0              | -0.999021               | 0.432337  | 0.146970  |
| 11               | 8                | 0              | -3.960273               | -0.609983 | -0.133407 |
| 12               | 8                | 0              | -2.037598               | 2.304806  | -0.211759 |
| 13               | 6                | 0              | -3.086003               | 2.533648  | -0.835393 |
| 14               | 8                | 0              | -3.955774               | 1.645737  | -1.189480 |
| 15               | 6                | 0              | -3.485571               | -0.840500 | 0.998577  |
| 16               | 8                | 0              | -2.376934               | -0.385281 | 1.440963  |
| 17               | 6                | 0              | -4.237339               | -1.744164 | 1.958182  |
| 18               | 6                | 0              | -3.436991               | 3.943859  | -1.238239 |
| 19               | 1                | 0              | -3.821535               | 0.687401  | -0.779355 |
| 20               | 1                | 0              | 1.540676                | 1.966046  | 1.586558  |
| 21               | 1                | 0              | 3.957529                | 2.378648  | 2.182246  |
| 22               | 1                | 0              | 6.533322                | 1.464597  | 1.402278  |
| 23               | 1                | 0              | 7.615006                | -0.106040 | -0.203319 |
| 24               | 1                | 0              | 6.250561                | -1.480229 | -1.756757 |
| 25               | 1                | 0              | 3.770853                | -1.329982 | -1.753172 |
| 26               | 1                | 0              | -3.674882               | 3.971944  | -2.312193 |
| 27               | 1                | 0              | -4.344784               | 4.256896  | -0.698664 |
| 28               | 1                | 0              | -2.612473               | 4.628821  | -1.009290 |
| 29               | 1                | 0              | -5.246653               | -1.953343 | 1.582526  |
| 30               | 1                | 0              | -3.678156               | -2.687149 | 2.066091  |

|    |   |   |           |           |           |
|----|---|---|-----------|-----------|-----------|
| 31 | 1 | 0 | -4.284394 | -1.280628 | 2.954505  |
| 32 | 6 | 0 | 0.335642  | -1.085098 | 0.172571  |
| 33 | 1 | 0 | 0.623552  | -1.336499 | 1.198957  |
| 34 | 6 | 0 | 1.152243  | -0.083599 | -0.564332 |
| 35 | 1 | 0 | 0.429636  | 0.846405  | -0.831889 |
| 36 | 1 | 0 | 1.350936  | -0.417097 | -1.594518 |
| 37 | 6 | 0 | -0.214675 | -2.220793 | -0.625895 |
| 38 | 8 | 0 | -0.163575 | -2.308030 | -1.834216 |
| 39 | 8 | 0 | -0.797528 | -3.144803 | 0.159018  |
| 40 | 6 | 0 | -1.425809 | -4.235281 | -0.515833 |
| 41 | 1 | 0 | -0.714354 | -4.750487 | -1.178255 |
| 42 | 1 | 0 | -1.780434 | -4.916110 | 0.267938  |
| 43 | 1 | 0 | -2.273213 | -3.878052 | -1.121091 |

TS3 E=-1255.823376

| Center<br>Number | Atomic<br>Number | Atomic<br>Type | Coordinates (Angstroms) |           |           |
|------------------|------------------|----------------|-------------------------|-----------|-----------|
|                  |                  |                | X                       | Y         | Z         |
| 1                | 6                | 0              | 4.519819                | -0.144558 | 0.902414  |
| 2                | 6                | 0              | 3.601435                | -0.164274 | -0.183329 |
| 3                | 6                | 0              | 4.042173                | 0.243545  | -1.456261 |
| 4                | 6                | 0              | 5.363752                | 0.650270  | -1.611857 |
| 5                | 6                | 0              | 6.259890                | 0.657710  | -0.520648 |
| 6                | 6                | 0              | 5.852119                | 0.260539  | 0.749833  |
| 7                | 6                | 0              | 2.539166                | -0.868417 | 1.692021  |
| 8                | 6                | 0              | 2.337484                | -0.637285 | 0.341516  |
| 9                | 7                | 0              | 3.836204                | -0.578941 | 2.022863  |
| 10               | 46               | 0              | -0.712111               | 0.407638  | 0.204303  |
| 11               | 8                | 0              | -3.834442               | 0.052351  | -0.164473 |
| 12               | 8                | 0              | -1.270730               | 2.470274  | 0.168168  |
| 13               | 6                | 0              | -2.247859               | 2.981036  | -0.406442 |
| 14               | 8                | 0              | -3.254123               | 2.341968  | -0.898520 |
| 15               | 6                | 0              | -3.462870               | -0.354428 | 0.964638  |
| 16               | 8                | 0              | -2.317156               | -0.142838 | 1.471103  |
| 17               | 6                | 0              | -4.420054               | -1.185634 | 1.798376  |
| 18               | 6                | 0              | -2.317029               | 4.479495  | -0.567917 |
| 19               | 1                | 0              | -3.363187               | 1.317997  | -0.622731 |
| 20               | 1                | 0              | 1.835780                | -1.210575 | 2.448826  |
| 21               | 1                | 0              | 4.230629                | -0.668355 | 2.950026  |
| 22               | 1                | 0              | 6.545493                | 0.267379  | 1.594432  |
| 23               | 1                | 0              | 7.291804                | 0.981746  | -0.675937 |
| 24               | 1                | 0              | 5.717617                | 0.970003  | -2.594901 |
| 25               | 1                | 0              | 3.360752                | 0.242760  | -2.310752 |
| 26               | 1                | 0              | -2.503759               | 4.725621  | -1.624106 |
| 27               | 1                | 0              | -3.171847               | 4.865435  | 0.009428  |
| 28               | 1                | 0              | -1.389107               | 4.950017  | -0.222952 |
| 29               | 1                | 0              | -5.443348               | -1.113118 | 1.408707  |
| 30               | 1                | 0              | -4.088371               | -2.235964 | 1.762377  |
| 31               | 1                | 0              | -4.382106               | -0.867356 | 2.850201  |
| 32               | 6                | 0              | -0.035666               | -1.550271 | 0.020457  |
| 33               | 1                | 0              | -0.056351               | -2.009828 | 1.012149  |
| 34               | 6                | 0              | 1.111258                | -0.833241 | -0.434609 |
| 35               | 1                | 0              | 0.526271                | 0.712154  | -0.708406 |
| 36               | 1                | 0              | 1.245434                | -0.845709 | -1.521294 |
| 37               | 6                | 0              | -0.921218               | -2.172961 | -1.008941 |
| 38               | 8                | 0              | -0.799680               | -2.033304 | -2.205784 |
| 39               | 8                | 0              | -1.892625               | -2.906464 | -0.436482 |
| 40               | 6                | 0              | -2.895463               | -3.423649 | -1.314967 |
| 41               | 1                | 0              | -2.439948               | -3.931136 | -2.177165 |
| 42               | 1                | 0              | -3.488053               | -4.130235 | -0.720525 |
| 43               | 1                | 0              | -3.535600               | -2.602753 | -1.673139 |

Int5 E=-1255.829542

| Center<br>Number | Atomic<br>Number | Atomic<br>Type | Coordinates (Angstroms) |           |           |
|------------------|------------------|----------------|-------------------------|-----------|-----------|
|                  |                  |                | X                       | Y         | Z         |
| 1                | 6                | 0              | 4.034113                | 0.788295  | 0.808538  |
| 2                | 6                | 0              | 3.369942                | -0.038466 | -0.137046 |
| 3                | 6                | 0              | 4.056442                | -0.423637 | -1.302336 |
| 4                | 6                | 0              | 5.362141                | 0.021013  | -1.492590 |
| 5                | 6                | 0              | 6.002525                | 0.840305  | -0.538651 |
| 6                | 6                | 0              | 5.348311                | 1.234339  | 0.626177  |
| 7                | 6                | 0              | 1.966245                | 0.375756  | 1.606682  |
| 8                | 6                | 0              | 2.043606                | -0.304205 | 0.394018  |
| 9                | 7                | 0              | 3.145259                | 1.015633  | 1.847523  |
| 10               | 46               | 0              | -0.848169               | 0.115635  | -0.518983 |
| 11               | 8                | 0              | -3.326250               | 0.849115  | 1.485646  |
| 12               | 8                | 0              | -1.710387               | 1.804858  | -1.451950 |
| 13               | 6                | 0              | -2.879311               | 2.235504  | -1.473070 |
| 14               | 8                | 0              | -3.821765               | 1.881770  | -0.675064 |
| 15               | 6                | 0              | -2.230520               | 0.858453  | 2.098977  |
| 16               | 8                | 0              | -1.083755               | 0.815798  | 1.557139  |
| 17               | 6                | 0              | -2.263903               | 0.900825  | 3.618422  |
| 18               | 6                | 0              | -3.266350               | 3.269369  | -2.501264 |
| 19               | 1                | 0              | -3.522294               | 1.336403  | 0.207121  |
| 20               | 1                | 0              | 1.104187                | 0.489008  | 2.261723  |
| 21               | 1                | 0              | 3.327092                | 1.603122  | 2.651143  |
| 22               | 1                | 0              | 5.842981                | 1.867667  | 1.366694  |
| 23               | 1                | 0              | 7.028597                | 1.171147  | -0.716500 |
| 24               | 1                | 0              | 5.903560                | -0.268842 | -2.396349 |
| 25               | 1                | 0              | 3.575920                | -1.059264 | -2.050067 |
| 26               | 1                | 0              | -4.171483               | 2.935807  | -3.030741 |
| 27               | 1                | 0              | -3.521011               | 4.210082  | -1.988114 |
| 28               | 1                | 0              | -2.448035               | 3.439190  | -3.210431 |
| 29               | 1                | 0              | -3.285232               | 1.066943  | 3.982831  |
| 30               | 1                | 0              | -1.885247               | -0.054328 | 4.016971  |
| 31               | 1                | 0              | -1.596103               | 1.695025  | 3.985431  |
| 32               | 6                | 0              | -0.113283               | -1.690157 | 0.339610  |
| 33               | 1                | 0              | -0.319040               | -1.574579 | 1.405555  |
| 34               | 6                | 0              | 1.031979                | -1.118880 | -0.240761 |
| 35               | 1                | 0              | -0.734290               | -0.454047 | -1.921984 |
| 36               | 1                | 0              | 1.301640                | -1.525107 | -1.220266 |
| 37               | 6                | 0              | -0.753045               | -2.869410 | -0.318401 |
| 38               | 8                | 0              | -0.414983               | -3.366625 | -1.367250 |
| 39               | 8                | 0              | -1.768461               | -3.335616 | 0.433498  |
| 40               | 6                | 0              | -2.476733               | -4.457966 | -0.090258 |
| 41               | 1                | 0              | -1.801435               | -5.314940 | -0.235475 |
| 42               | 1                | 0              | -3.251033               | -4.702249 | 0.647281  |
| 43               | 1                | 0              | -2.937939               | -4.210934 | -1.058679 |

TS4 E=-1406.204405

| Center<br>Number | Atomic<br>Number | Atomic<br>Type | Coordinates (Angstroms) |           |           |
|------------------|------------------|----------------|-------------------------|-----------|-----------|
|                  |                  |                | X                       | Y         | Z         |
| 1                | 6                | 0              | 4.010742                | -0.939847 | -0.995224 |
| 2                | 6                | 0              | 3.343282                | 0.001293  | -0.166223 |
| 3                | 6                | 0              | 4.014870                | 0.516309  | 0.956959  |
| 4                | 6                | 0              | 5.314050                | 0.088099  | 1.216919  |
| 5                | 6                | 0              | 5.960147                | -0.843344 | 0.376299  |
| 6                | 6                | 0              | 5.318215                | -1.370669 | -0.741816 |
| 7                | 6                | 0              | 1.956156                | -0.612586 | -1.863940 |
| 8                | 6                | 0              | 2.026512                | 0.211411  | -0.743008 |
| 9                | 7                | 0              | 3.131899                | -1.286805 | -2.009782 |
| 10               | 46               | 0              | -0.797173               | -0.144111 | 0.296571  |
| 11               | 8                | 0              | -3.403245               | -1.186766 | -1.349941 |

|    |   |   |           |           |           |
|----|---|---|-----------|-----------|-----------|
| 12 | 8 | 0 | -1.554040 | -1.660036 | 1.574239  |
| 13 | 6 | 0 | -2.692461 | -2.138047 | 1.741975  |
| 14 | 8 | 0 | -3.690310 | -1.982965 | 0.948069  |
| 15 | 6 | 0 | -2.378847 | -1.258622 | -2.072585 |
| 16 | 8 | 0 | -1.183387 | -1.118780 | -1.672403 |
| 17 | 6 | 0 | -2.573786 | -1.492897 | -3.562906 |
| 18 | 6 | 0 | -2.969680 | -2.983080 | 2.960042  |
| 19 | 1 | 0 | -3.475803 | -1.542845 | -0.010228 |
| 20 | 1 | 0 | 1.104732  | -0.797455 | -2.516377 |
| 21 | 1 | 0 | 3.318503  | -1.968765 | -2.733764 |
| 22 | 1 | 0 | 5.816650  | -2.093385 | -1.392492 |
| 23 | 1 | 0 | 6.980654  | -1.158146 | 0.607448  |
| 24 | 1 | 0 | 5.845034  | 0.477736  | 2.088755  |
| 25 | 1 | 0 | 3.524231  | 1.231855  | 1.620993  |
| 26 | 1 | 0 | -3.869606 | -2.606812 | 3.469146  |
| 27 | 1 | 0 | -3.186885 | -4.014367 | 2.639922  |
| 28 | 1 | 0 | -2.111628 | -2.976297 | 3.641982  |
| 29 | 1 | 0 | -3.573339 | -1.899267 | -3.763388 |
| 30 | 1 | 0 | -2.472320 | -0.529333 | -4.089250 |
| 31 | 1 | 0 | -1.797063 | -2.166869 | -3.951883 |
| 32 | 6 | 0 | -0.153821 | 1.530484  | -0.887509 |
| 33 | 1 | 0 | -0.365280 | 1.229770  | -1.914958 |
| 34 | 6 | 0 | 1.007256  | 1.098921  | -0.228984 |
| 35 | 1 | 0 | -0.550056 | 0.659648  | 1.762474  |
| 36 | 1 | 0 | 1.270535  | 1.648782  | 0.682620  |
| 37 | 6 | 0 | -0.872758 | 2.742670  | -0.404415 |
| 38 | 8 | 0 | -0.630714 | 3.353004  | 0.612667  |
| 39 | 8 | 0 | -1.848888 | 3.090342  | -1.265133 |
| 40 | 6 | 0 | -2.631369 | 4.227870  | -0.904853 |
| 41 | 1 | 0 | -1.998245 | 5.121958  | -0.799537 |
| 42 | 1 | 0 | -3.358387 | 4.367475  | -1.714279 |
| 43 | 1 | 0 | -3.152720 | 4.056799  | 0.049356  |
| 44 | 8 | 0 | -0.347976 | 1.085123  | 2.935669  |
| 45 | 8 | 0 | 0.749389  | 1.661133  | 3.049994  |

Int6 E=-1255.833447

| Center<br>Number | Atomic<br>Number | Atomic<br>Type | Coordinates (Angstroms) |           |           |
|------------------|------------------|----------------|-------------------------|-----------|-----------|
|                  |                  |                | X                       | Y         | Z         |
| 1                | 6                | 0              | -3.948886               | -0.337628 | 0.559121  |
| 2                | 6                | 0              | -3.066260               | 0.372660  | -0.298345 |
| 3                | 6                | 0              | -3.466803               | 0.635163  | -1.620913 |
| 4                | 6                | 0              | -4.717463               | 0.194742  | -2.044314 |
| 5                | 6                | 0              | -5.580426               | -0.505059 | -1.173469 |
| 6                | 6                | 0              | -5.209115               | -0.781682 | 0.139795  |
| 7                | 6                | 0              | -2.085834               | 0.133728  | 1.736460  |
| 8                | 6                | 0              | -1.873753               | 0.673423  | 0.473982  |
| 9                | 7                | 0              | -3.314464               | -0.463353 | 1.783655  |
| 10               | 46               | 0              | 1.017411                | 0.018881  | -0.241537 |
| 11               | 8                | 0              | 1.917946                | -2.996575 | 1.151703  |
| 12               | 8                | 0              | 2.374729                | -0.907398 | -3.045068 |
| 13               | 6                | 0              | 2.432805                | -1.780644 | -2.207784 |
| 14               | 8                | 0              | 1.946130                | -1.670000 | -0.977565 |
| 15               | 6                | 0              | 1.343180                | -2.215300 | 2.019103  |
| 16               | 8                | 0              | 0.897021                | -1.090981 | 1.761343  |
| 17               | 6                | 0              | 1.256669                | -2.796271 | 3.407815  |
| 18               | 6                | 0              | 3.077314                | -3.134546 | -2.468235 |
| 19               | 1                | 0              | 1.972892                | -2.546528 | 0.219288  |
| 20               | 1                | 0              | -1.420909               | 0.117243  | 2.596565  |
| 21               | 1                | 0              | -3.702811               | -0.924237 | 2.596100  |
| 22               | 1                | 0              | -5.875831               | -1.324561 | 0.814347  |
| 23               | 1                | 0              | -6.556104               | -0.836985 | -1.536640 |
| 24               | 1                | 0              | -5.039183               | 0.391310  | -3.069810 |
| 25               | 1                | 0              | -2.807708               | 1.170974  | -2.308145 |

|    |   |   |           |           |           |
|----|---|---|-----------|-----------|-----------|
| 26 | 1 | 0 | 3.892922  | -3.309753 | -1.748859 |
| 27 | 1 | 0 | 2.337309  | -3.937627 | -2.323846 |
| 28 | 1 | 0 | 3.470434  | -3.172548 | -3.491483 |
| 29 | 1 | 0 | 0.704094  | -3.747992 | 3.374986  |
| 30 | 1 | 0 | 2.270318  | -3.026161 | 3.770806  |
| 31 | 1 | 0 | 0.764842  | -2.094320 | 4.091221  |
| 32 | 6 | 0 | 0.395362  | 1.832079  | 0.723985  |
| 33 | 1 | 0 | 0.491743  | 1.616501  | 1.791353  |
| 34 | 6 | 0 | -0.721689 | 1.409882  | -0.009871 |
| 35 | 1 | 0 | 1.227895  | 0.704899  | -1.563099 |
| 36 | 1 | 0 | -0.846637 | 1.888428  | -0.985724 |
| 37 | 6 | 0 | 1.213089  | 2.976199  | 0.224231  |
| 38 | 8 | 0 | 1.025859  | 3.585674  | -0.802377 |
| 39 | 8 | 0 | 2.203552  | 3.266988  | 1.091830  |
| 40 | 6 | 0 | 3.069761  | 4.336927  | 0.716830  |
| 41 | 1 | 0 | 2.504080  | 5.271672  | 0.583614  |
| 42 | 1 | 0 | 3.795917  | 4.443388  | 1.532282  |
| 43 | 1 | 0 | 3.587479  | 4.107534  | -0.227107 |

TS5 E=-1255.818909

| Center<br>Number | Atomic<br>Number | Atomic<br>Type | Coordinates (Angstroms) |           |           |
|------------------|------------------|----------------|-------------------------|-----------|-----------|
|                  |                  |                | X                       | Y         | Z         |
| 1                | 6                | 0              | 3.942914                | -0.617841 | -0.577508 |
| 2                | 6                | 0              | 3.147531                | 0.318950  | 0.139116  |
| 3                | 6                | 0              | 3.677411                | 0.913307  | 1.299411  |
| 4                | 6                | 0              | 4.960890                | 0.564879  | 1.709514  |
| 5                | 6                | 0              | 5.733593                | -0.366046 | 0.981427  |
| 6                | 6                | 0              | 5.236867                | -0.968940 | -0.171259 |
| 7                | 6                | 0              | 1.973306                | -0.423094 | -1.654521 |
| 8                | 6                | 0              | 1.887283                | 0.438283  | -0.569321 |
| 9                | 7                | 0              | 3.194511                | -1.045796 | -1.657898 |
| 10               | 46               | 0              | -0.990059               | 0.029181  | 0.165458  |
| 11               | 8                | 0              | -2.343453               | -3.235668 | -0.444225 |
| 12               | 8                | 0              | -1.912863               | 0.304740  | 2.821519  |
| 13               | 6                | 0              | -2.223905               | -0.880963 | 2.562391  |
| 14               | 8                | 0              | -1.967975               | -1.422422 | 1.430637  |
| 15               | 6                | 0              | -1.812139               | -2.756042 | -1.552448 |
| 16               | 8                | 0              | -1.244810               | -1.674954 | -1.637865 |
| 17               | 6                | 0              | -1.979045               | -3.687693 | -2.727374 |
| 18               | 6                | 0              | -2.916125               | -1.722885 | 3.606754  |
| 19               | 1                | 0              | -2.231623               | -2.605435 | 0.323776  |
| 20               | 1                | 0              | 1.220251                | -0.663073 | -2.402688 |
| 21               | 1                | 0              | 3.494197                | -1.727787 | -2.341751 |
| 22               | 1                | 0              | 5.834924                | -1.689127 | -0.735384 |
| 23               | 1                | 0              | 6.738843                | -0.617789 | 1.328352  |
| 24               | 1                | 0              | 5.381276                | 1.018639  | 2.610328  |
| 25               | 1                | 0              | 3.091103                | 1.635817  | 1.872336  |
| 26               | 1                | 0              | -3.859633               | -2.113750 | 3.196038  |
| 27               | 1                | 0              | -2.282625               | -2.590019 | 3.850060  |
| 28               | 1                | 0              | -3.113477               | -1.140106 | 4.513947  |
| 29               | 1                | 0              | -1.538598               | -4.668404 | -2.490373 |
| 30               | 1                | 0              | -3.051422               | -3.853565 | -2.914598 |
| 31               | 1                | 0              | -1.505116               | -3.262574 | -3.619677 |
| 32               | 6                | 0              | -0.303377               | 1.666518  | -1.015592 |
| 33               | 1                | 0              | -0.360191               | 1.335199  | -2.056730 |
| 34               | 6                | 0              | 0.771641                | 1.296779  | -0.190726 |
| 35               | 1                | 0              | -1.291552               | 0.713894  | 1.583122  |
| 36               | 1                | 0              | 0.924753                | 1.914256  | 0.699290  |
| 37               | 6                | 0              | -1.104293               | 2.876416  | -0.688050 |
| 38               | 8                | 0              | -0.964547               | 3.586405  | 0.282067  |
| 39               | 8                | 0              | -2.030992               | 3.110329  | -1.644910 |
| 40               | 6                | 0              | -2.871763               | 4.241305  | -1.436179 |
| 41               | 1                | 0              | -2.278632               | 5.165642  | -1.359585 |

|    |   |   |           |          |           |
|----|---|---|-----------|----------|-----------|
| 42 | 1 | 0 | -3.541926 | 4.290621 | -2.303819 |
| 43 | 1 | 0 | -3.457040 | 4.130776 | -0.509993 |

---

Int7 E=-1255.838301

| Center<br>Number | Atomic<br>Number | Atomic<br>Type | Coordinates (Angstroms) |           |           |
|------------------|------------------|----------------|-------------------------|-----------|-----------|
|                  |                  |                | X                       | Y         | Z         |
| 1                | 6                | 0              | 3.798925                | 0.553467  | -1.314199 |
| 2                | 6                | 0              | 2.921471                | 0.588848  | -0.191833 |
| 3                | 6                | 0              | 3.372513                | 0.070973  | 1.037899  |
| 4                | 6                | 0              | 4.658794                | -0.456049 | 1.120895  |
| 5                | 6                | 0              | 5.512131                | -0.478364 | -0.004226 |
| 6                | 6                | 0              | 5.094525                | 0.024457  | -1.233904 |
| 7                | 6                | 0              | 1.860293                | 1.493358  | -1.969400 |
| 8                | 6                | 0              | 1.679609                | 1.194685  | -0.631345 |
| 9                | 7                | 0              | 3.121682                | 1.109199  | -2.376870 |
| 10               | 46               | 0              | -0.993663               | -0.057485 | -0.068103 |
| 11               | 8                | 0              | -2.436294               | -3.247275 | -1.016319 |
| 12               | 8                | 0              | 0.317949                | -1.315305 | 2.355338  |
| 13               | 6                | 0              | 0.137674                | -2.372444 | 1.600419  |
| 14               | 8                | 0              | -0.433554               | -2.294263 | 0.510484  |
| 15               | 6                | 0              | -3.201174               | -2.186748 | -1.227806 |
| 16               | 8                | 0              | -2.918182               | -1.056736 | -0.859368 |
| 17               | 6                | 0              | -4.466050               | -2.512320 | -1.976376 |
| 18               | 6                | 0              | 0.708730                | -3.645500 | 2.149346  |
| 19               | 1                | 0              | -1.636697               | -2.987339 | -0.495772 |
| 20               | 1                | 0              | 1.173475                | 1.962447  | -2.670950 |
| 21               | 1                | 0              | 3.496931                | 1.240329  | -3.305986 |
| 22               | 1                | 0              | 5.755614                | 0.006857  | -2.104377 |
| 23               | 1                | 0              | 6.517812                | -0.895702 | 0.091556  |
| 24               | 1                | 0              | 5.019396                | -0.855204 | 2.072528  |
| 25               | 1                | 0              | 2.722236                | 0.077179  | 1.915788  |
| 26               | 1                | 0              | 0.290193                | -4.510931 | 1.622112  |
| 27               | 1                | 0              | 1.800557                | -3.624704 | 1.997234  |
| 28               | 1                | 0              | 0.525426                | -3.716489 | 3.230423  |
| 29               | 1                | 0              | -4.212053               | -2.950315 | -2.954266 |
| 30               | 1                | 0              | -5.041418               | -3.269931 | -1.422315 |
| 31               | 1                | 0              | -5.065423               | -1.605213 | -2.113641 |
| 32               | 6                | 0              | -0.719413               | 2.016139  | -0.235941 |
| 33               | 1                | 0              | -0.856955               | 2.327905  | -1.275814 |
| 34               | 6                | 0              | 0.494026                | 1.421429  | 0.209829  |
| 35               | 1                | 0              | -0.063001               | -0.532172 | 1.847222  |
| 36               | 1                | 0              | 0.714935                | 1.553047  | 1.276417  |
| 37               | 6                | 0              | -1.590651               | 2.712476  | 0.739401  |
| 38               | 8                | 0              | -1.448164               | 2.744946  | 1.944368  |
| 39               | 8                | 0              | -2.613557               | 3.346247  | 0.113316  |
| 40               | 6                | 0              | -3.540094               | 4.018204  | 0.956915  |
| 41               | 1                | 0              | -3.039611               | 4.788086  | 1.564917  |
| 42               | 1                | 0              | -4.281235               | 4.482925  | 0.293471  |
| 43               | 1                | 0              | -4.036916               | 3.312575  | 1.641675  |

---

O<sub>2</sub> E=-150.39076

| Center<br>Number | Atomic<br>Number | Atomic<br>Type | Coordinates (Angstroms) |          |           |
|------------------|------------------|----------------|-------------------------|----------|-----------|
|                  |                  |                | X                       | Y        | Z         |
| 1                | 8                | 0              | 0.000000                | 0.000000 | 0.599983  |
| 2                | 8                | 0              | 0.000000                | 0.000000 | -0.599983 |

---

TS6 E=-1406.23622

| Center<br>Number | Atomic<br>Number | Atomic<br>Type | Coordinates (Angstroms) |           |           |
|------------------|------------------|----------------|-------------------------|-----------|-----------|
|                  |                  |                | X                       | Y         | Z         |
| 1                | 6                | 0              | 3.889761                | 0.583780  | -1.312558 |
| 2                | 6                | 0              | 2.993441                | 0.753587  | -0.217654 |
| 3                | 6                | 0              | 3.457220                | 0.482693  | 1.084284  |
| 4                | 6                | 0              | 4.771133                | 0.057217  | 1.261917  |
| 5                | 6                | 0              | 5.641289                | -0.104125 | 0.161189  |
| 6                | 6                | 0              | 5.213415                | 0.157022  | -1.137896 |
| 7                | 6                | 0              | 1.912287                | 1.282990  | -2.130884 |
| 8                | 6                | 0              | 1.725497                | 1.202304  | -0.761390 |
| 9                | 7                | 0              | 3.198583                | 0.912311  | -2.458255 |
| 10               | 46               | 0              | -0.926592               | -0.063905 | -0.179874 |
| 11               | 8                | 0              | -1.961519               | -3.417875 | -1.149394 |
| 12               | 8                | 0              | 0.778410                | -1.356771 | 2.283804  |
| 13               | 6                | 0              | 0.610120                | -2.340673 | 1.427307  |
| 14               | 8                | 0              | -0.125313               | -2.233157 | 0.447342  |
| 15               | 6                | 0              | -2.818133               | -2.453430 | -1.455132 |
| 16               | 8                | 0              | -2.668928               | -1.284143 | -1.137700 |
| 17               | 6                | 0              | -4.005496               | -2.948189 | -2.237268 |
| 18               | 6                | 0              | 1.412128                | -3.567765 | 1.741705  |
| 19               | 1                | 0              | -1.222374               | -3.052865 | -0.604530 |
| 20               | 1                | 0              | 1.210794                | 1.583028  | -2.906513 |
| 21               | 1                | 0              | 3.580543                | 0.906990  | -3.394052 |
| 22               | 1                | 0              | 5.887572                | 0.034616  | -1.989628 |
| 23               | 1                | 0              | 6.668476                | -0.436412 | 0.331736  |
| 24               | 1                | 0              | 5.140010                | -0.150196 | 2.269639  |
| 25               | 1                | 0              | 2.797531                | 0.601278  | 1.946420  |
| 26               | 1                | 0              | 1.100283                | -4.402839 | 1.103972  |
| 27               | 1                | 0              | 2.475519                | -3.342126 | 1.559114  |
| 28               | 1                | 0              | 1.308952                | -3.827954 | 2.804921  |
| 29               | 1                | 0              | -3.662762               | -3.473239 | -3.142028 |
| 30               | 1                | 0              | -4.565496               | -3.677908 | -1.631685 |
| 31               | 1                | 0              | -4.654685               | -2.107397 | -2.506696 |
| 32               | 6                | 0              | -0.691302               | 2.011661  | -0.540108 |
| 33               | 1                | 0              | -0.797300               | 2.198794  | -1.612772 |
| 34               | 6                | 0              | 0.511232                | 1.500009  | 0.011162  |
| 35               | 1                | 0              | 0.215917                | -0.596624 | 2.003267  |
| 36               | 1                | 0              | 0.677066                | 1.729399  | 1.070352  |
| 37               | 6                | 0              | -1.612758               | 2.788683  | 0.321924  |
| 38               | 8                | 0              | -1.491292               | 2.980798  | 1.513212  |
| 39               | 8                | 0              | -2.647994               | 3.288398  | -0.395342 |
| 40               | 6                | 0              | -3.620059               | 4.019842  | 0.342492  |
| 41               | 1                | 0              | -3.163561               | 4.879420  | 0.857633  |
| 42               | 1                | 0              | -4.364341               | 4.366129  | -0.386388 |
| 43               | 1                | 0              | -4.101442               | 3.382091  | 1.100492  |
| 44               | 8                | 0              | -2.499107               | -0.085989 | 1.749637  |
| 45               | 8                | 0              | -1.963783               | -0.218059 | 2.845216  |

Int8<sub>triplet</sub> E=-1406.247785

| Center<br>Number | Atomic<br>Number | Atomic<br>Type | Coordinates (Angstroms) |           |           |
|------------------|------------------|----------------|-------------------------|-----------|-----------|
|                  |                  |                | X                       | Y         | Z         |
| 1                | 6                | 0              | -4.116591               | -0.684771 | 0.473327  |
| 2                | 6                | 0              | -3.247553               | 0.206261  | -0.212065 |
| 3                | 6                | 0              | -3.573478               | 0.605643  | -1.520969 |
| 4                | 6                | 0              | -4.744865               | 0.122836  | -2.097448 |
| 5                | 6                | 0              | -5.599098               | -0.754667 | -1.394830 |
| 6                | 6                | 0              | -5.297242               | -1.172388 | -0.101132 |
| 7                | 6                | 0              | -2.387485               | -0.226150 | 1.844396  |
| 8                | 6                | 0              | -2.141986               | 0.496360  | 0.683824  |
| 9                | 7                | 0              | -3.557529               | -0.923602 | 1.717257  |
| 10               | 46               | 0              | 0.803130                | 0.041586  | -0.192643 |



|    |   |   |           |           |           |
|----|---|---|-----------|-----------|-----------|
| 11 | 8 | 0 | 2.076998  | -2.986526 | 1.196802  |
| 12 | 8 | 0 | 3.011759  | -0.727568 | -2.782154 |
| 13 | 6 | 0 | 2.973268  | -1.583256 | -1.880883 |
| 14 | 8 | 0 | 2.116507  | -1.586994 | -0.923727 |
| 15 | 6 | 0 | 1.367491  | -2.305875 | 2.058166  |
| 16 | 8 | 0 | 0.811690  | -1.236033 | 1.806616  |
| 17 | 6 | 0 | 1.279151  | -2.951769 | 3.418209  |
| 18 | 6 | 0 | 3.978747  | -2.717555 | -1.890475 |
| 19 | 1 | 0 | 2.121057  | -2.491201 | 0.300079  |
| 20 | 1 | 0 | -1.788880 | -0.295553 | 2.749622  |
| 21 | 1 | 0 | -3.958638 | -1.516521 | 2.431837  |
| 22 | 1 | 0 | -5.955959 | -1.855140 | 0.441389  |
| 23 | 1 | 0 | -6.511601 | -1.115348 | -1.875863 |
| 24 | 1 | 0 | -5.009055 | 0.424286  | -3.113930 |
| 25 | 1 | 0 | -2.913735 | 1.273938  | -2.079469 |
| 26 | 1 | 0 | 4.470044  | -2.796150 | -0.908554 |
| 27 | 1 | 0 | 3.451212  | -3.668642 | -2.067579 |
| 28 | 1 | 0 | 4.726513  | -2.563067 | -2.677731 |
| 29 | 1 | 0 | 0.833169  | -3.953831 | 3.321359  |
| 30 | 1 | 0 | 2.292682  | -3.088886 | 3.825655  |
| 31 | 1 | 0 | 0.681548  | -2.334964 | 4.099407  |
| 32 | 6 | 0 | 0.049147  | 1.682982  | 1.202991  |
| 33 | 1 | 0 | 0.182580  | 1.219090  | 2.182129  |
| 34 | 6 | 0 | -1.033827 | 1.383508  | 0.392582  |
| 35 | 1 | 0 | 1.977223  | 0.227989  | -2.966861 |
| 36 | 1 | 0 | -1.137904 | 2.004615  | -0.502972 |
| 37 | 6 | 0 | 0.891348  | 2.873103  | 0.922216  |
| 38 | 8 | 0 | 0.756128  | 3.643666  | -0.000538 |
| 39 | 8 | 0 | 1.855395  | 3.006071  | 1.862213  |
| 40 | 6 | 0 | 2.735479  | 4.115088  | 1.699744  |
| 41 | 1 | 0 | 2.177574  | 5.064158  | 1.696394  |
| 42 | 1 | 0 | 3.428861  | 4.084407  | 2.549709  |
| 43 | 1 | 0 | 3.291933  | 4.040018  | 0.752553  |
| 44 | 8 | 0 | 0.514646  | 1.124974  | -2.089484 |
| 45 | 8 | 0 | 1.207511  | 0.932027  | -3.182520 |

Int8<sub>singlet</sub> E=-1406.273981

| Center<br>Number | Atomic<br>Number | Atomic<br>Type | Coordinates (Angstroms) |           |           |
|------------------|------------------|----------------|-------------------------|-----------|-----------|
|                  |                  |                | X                       | Y         | Z         |
| 1                | 6                | 0              | -4.107823               | 0.411846  | 0.137460  |
| 2                | 6                | 0              | -2.962329               | 0.728952  | -0.640058 |
| 3                | 6                | 0              | -3.026661               | 0.588756  | -2.037926 |
| 4                | 6                | 0              | -4.216776               | 0.152589  | -2.614044 |
| 5                | 6                | 0              | -5.345358               | -0.150608 | -1.822466 |
| 6                | 6                | 0              | -5.307651               | -0.026738 | -0.435718 |
| 7                | 6                | 0              | -2.480176               | 1.059212  | 1.554855  |
| 8                | 6                | 0              | -1.922444               | 1.144904  | 0.284899  |
| 9                | 7                | 0              | -3.771942               | 0.623815  | 1.465575  |
| 10               | 46               | 0              | 0.952657                | -0.093190 | 0.055309  |
| 11               | 8                | 0              | 0.241396                | -3.129662 | 1.431967  |
| 12               | 8                | 0              | 3.123283                | -2.016520 | -1.993772 |
| 13               | 6                | 0              | 2.313640                | -2.652775 | -1.328006 |
| 14               | 8                | 0              | 1.485428                | -2.128483 | -0.462712 |
| 15               | 6                | 0              | -0.119637               | -2.125558 | 2.164330  |
| 16               | 8                | 0              | 0.062382                | -0.933569 | 1.865323  |
| 17               | 6                | 0              | -0.811494               | -2.495720 | 3.449961  |
| 18               | 6                | 0              | 2.204770                | -4.161411 | -1.466974 |
| 19               | 1                | 0              | 0.759186                | -2.805931 | 0.577156  |
| 20               | 1                | 0              | -2.034103               | 1.291813  | 2.519152  |
| 21               | 1                | 0              | -4.402123               | 0.515492  | 2.249647  |
| 22               | 1                | 0              | -6.180435               | -0.263381 | 0.177875  |
| 23               | 1                | 0              | -6.264638               | -0.490159 | -2.305767 |
| 24               | 1                | 0              | -4.280678               | 0.040796  | -3.698999 |

|    |   |   |           |           |           |
|----|---|---|-----------|-----------|-----------|
| 25 | 1 | 0 | -2.158457 | 0.813992  | -2.661888 |
| 26 | 1 | 0 | 2.329055  | -4.644255 | -0.484735 |
| 27 | 1 | 0 | 1.201752  | -4.427252 | -1.836949 |
| 28 | 1 | 0 | 2.965976  | -4.532633 | -2.163966 |
| 29 | 1 | 0 | -1.744673 | -3.031965 | 3.216094  |
| 30 | 1 | 0 | -0.176617 | -3.187901 | 4.023353  |
| 31 | 1 | 0 | -1.029938 | -1.601013 | 4.044129  |
| 32 | 6 | 0 | 0.471317  | 1.876299  | 0.787464  |
| 33 | 1 | 0 | 0.385437  | 1.728297  | 1.868265  |
| 34 | 6 | 0 | -0.595479 | 1.590821  | -0.073016 |
| 35 | 1 | 0 | 3.287929  | -0.417040 | -1.667441 |
| 36 | 1 | 0 | -0.459434 | 1.923172  | -1.107812 |
| 37 | 6 | 0 | 1.540838  | 2.828502  | 0.341403  |
| 38 | 8 | 0 | 1.433496  | 3.614412  | -0.566447 |
| 39 | 8 | 0 | 2.634809  | 2.705851  | 1.113081  |
| 40 | 6 | 0 | 3.777881  | 3.457980  | 0.701653  |
| 41 | 1 | 0 | 3.532033  | 4.526107  | 0.606715  |
| 42 | 1 | 0 | 4.538918  | 3.305677  | 1.477069  |
| 43 | 1 | 0 | 4.140816  | 3.082658  | -0.266721 |
| 44 | 8 | 0 | 1.807549  | 0.713043  | -1.493990 |
| 45 | 8 | 0 | 3.173616  | 0.516334  | -1.317366 |

-----  
 Sc(OTf)<sub>3</sub> E=-3646.290346

| Center<br>Number | Atomic<br>Number | Atomic<br>Type | Coordinates (Angstroms) |           |           |
|------------------|------------------|----------------|-------------------------|-----------|-----------|
|                  |                  |                | X                       | Y         | Z         |
| 1                | 21               | 0              | -0.445419               | -0.196403 | 0.215892  |
| 2                | 8                | 0              | 1.093710                | -1.245518 | 0.633508  |
| 3                | 16               | 0              | 2.080390                | -2.412620 | 0.178564  |
| 4                | 8                | 0              | 1.557365                | -3.026706 | -1.031253 |
| 5                | 8                | 0              | 2.501560                | -3.182828 | 1.330561  |
| 6                | 6                | 0              | 3.530531                | -1.338754 | -0.336939 |
| 7                | 8                | 0              | -1.902608               | -1.095473 | -1.029637 |
| 8                | 16               | 0              | -2.911955               | -1.385441 | 0.087622  |
| 9                | 8                | 0              | -2.143270               | -0.891292 | 1.313885  |
| 10               | 8                | 0              | -3.544272               | -2.678536 | 0.134135  |
| 11               | 6                | 0              | -4.226473               | -0.069638 | -0.170861 |
| 12               | 8                | 0              | -0.393490               | 1.724519  | 1.137772  |
| 13               | 16               | 0              | 0.026612                | 2.487981  | -0.122109 |
| 14               | 8                | 0              | -0.683982               | 3.694749  | -0.463740 |
| 15               | 8                | 0              | 0.081148                | 1.354843  | -1.149342 |
| 16               | 6                | 0              | 1.828139                | 2.927439  | 0.183172  |
| 17               | 9                | 0              | 3.128826                | -0.465677 | -1.259860 |
| 18               | 9                | 0              | 4.007541                | -0.680069 | 0.710387  |
| 19               | 9                | 0              | 4.475468                | -2.114472 | -0.844956 |
| 20               | 9                | 0              | -5.080021               | -0.105323 | 0.834694  |
| 21               | 9                | 0              | -4.849610               | -0.298089 | -1.311128 |
| 22               | 9                | 0              | -3.622190               | 1.114720  | -0.212609 |
| 23               | 9                | 0              | 2.476884                | 1.836587  | 0.566202  |
| 24               | 9                | 0              | 1.883912                | 3.843805  | 1.132178  |
| 25               | 9                | 0              | 2.347030                | 3.395340  | -0.936940 |

-----  
 Pd(OAc)<sub>2</sub>-Sc(OTf)<sub>3</sub> E= -4231.556786

| Center<br>Number | Atomic<br>Number | Atomic<br>Type | Coordinates (Angstroms) |           |           |
|------------------|------------------|----------------|-------------------------|-----------|-----------|
|                  |                  |                | X                       | Y         | Z         |
| 1                | 46               | 0              | -1.578715               | -1.666155 | 0.053279  |
| 2                | 8                | 0              | -0.324057               | 0.323577  | 1.901760  |
| 3                | 8                | 0              | -1.436934               | -1.790733 | -1.958518 |
| 4                | 6                | 0              | -0.987430               | -0.514800 | 2.582010  |
| 5                | 8                | 0              | -1.651173               | -1.464989 | 2.062591  |

|    |    |   |           |           |           |
|----|----|---|-----------|-----------|-----------|
| 6  | 6  | 0 | -0.722056 | -0.916807 | -2.541274 |
| 7  | 8  | 0 | -0.092627 | -0.012031 | -1.916541 |
| 8  | 6  | 0 | -0.961368 | -0.420446 | 4.079602  |
| 9  | 1  | 0 | -1.772734 | -1.006352 | 4.527182  |
| 10 | 1  | 0 | 0.006508  | -0.828226 | 4.415735  |
| 11 | 1  | 0 | -1.011200 | 0.632556  | 4.388978  |
| 12 | 6  | 0 | -0.660191 | -0.945230 | -4.039665 |
| 13 | 1  | 0 | -1.319701 | -0.143956 | -4.411948 |
| 14 | 1  | 0 | 0.363173  | -0.723555 | -4.372750 |
| 15 | 1  | 0 | -1.007111 | -1.908779 | -4.431232 |
| 16 | 21 | 0 | 0.257379  | 0.741946  | -0.035901 |
| 17 | 8  | 0 | 1.580703  | -0.885328 | 0.214394  |
| 18 | 16 | 0 | 1.411912  | -2.308338 | 0.700296  |
| 19 | 8  | 0 | 0.076714  | -2.871381 | 0.221248  |
| 20 | 8  | 0 | 1.740533  | -2.542721 | 2.093323  |
| 21 | 6  | 0 | 2.620514  | -3.260868 | -0.371819 |
| 22 | 8  | 0 | -1.668955 | 1.608471  | -0.242061 |
| 23 | 16 | 0 | -3.004145 | 1.034036  | -0.663007 |
| 24 | 8  | 0 | -3.170634 | -0.380418 | -0.114401 |
| 25 | 8  | 0 | -3.364542 | 1.223863  | -2.054765 |
| 26 | 6  | 0 | -4.217684 | 1.984213  | 0.404851  |
| 27 | 8  | 0 | 1.394335  | 2.326443  | -0.021809 |
| 28 | 16 | 0 | 2.695132  | 2.787772  | -0.784912 |
| 29 | 8  | 0 | 2.607496  | 4.185505  | -1.162897 |
| 30 | 8  | 0 | 3.085970  | 1.755168  | -1.739045 |
| 31 | 6  | 0 | 3.906145  | 2.685740  | 0.642462  |
| 32 | 9  | 0 | 2.335675  | -3.045740 | -1.647334 |
| 33 | 9  | 0 | 3.844404  | -2.840506 | -0.104359 |
| 34 | 9  | 0 | 2.512305  | -4.549399 | -0.095865 |
| 35 | 9  | 0 | -5.439790 | 1.540920  | 0.166392  |
| 36 | 9  | 0 | -4.132814 | 3.268055  | 0.100211  |
| 37 | 9  | 0 | -3.912022 | 1.803176  | 1.681984  |
| 38 | 9  | 0 | 3.872331  | 1.465618  | 1.176204  |
| 39 | 9  | 0 | 3.594705  | 3.577727  | 1.574140  |
| 40 | 9  | 0 | 5.128363  | 2.930241  | 0.187056  |

React<sup>2</sup> E=-4595.554486

| Center<br>Number | Atomic<br>Number | Atomic<br>Type | Coordinates (Angstroms) |           |           |
|------------------|------------------|----------------|-------------------------|-----------|-----------|
|                  |                  |                | X                       | Y         | Z         |
| 1                | 6                | 0              | 3.175420                | -2.952569 | -1.683945 |
| 2                | 6                | 0              | 2.201097                | -2.828597 | -0.664103 |
| 3                | 6                | 0              | 0.981154                | -3.509255 | -0.780190 |
| 4                | 6                | 0              | 0.759320                | -4.281683 | -1.921253 |
| 5                | 6                | 0              | 1.733197                | -4.378501 | -2.934309 |
| 6                | 6                | 0              | 2.958609                | -3.715106 | -2.833688 |
| 7                | 6                | 0              | 4.074676                | -1.624972 | -0.088476 |
| 8                | 6                | 0              | 2.758231                | -1.944212 | 0.355923  |
| 9                | 7                | 0              | 4.293216                | -2.215339 | -1.289890 |
| 10               | 46               | 0              | 2.527949                | 0.188983  | -0.081976 |
| 11               | 8                | 0              | 2.149992                | -0.063599 | -2.111001 |
| 12               | 8                | 0              | 2.808558                | 0.528624  | 1.846276  |
| 13               | 6                | 0              | 4.011368                | 0.758836  | 2.320423  |
| 14               | 8                | 0              | 5.055743                | 0.588096  | 1.706718  |
| 15               | 6                | 0              | 1.012924                | -0.073741 | -2.625076 |
| 16               | 8                | 0              | -0.069173               | -0.051217 | -1.930326 |
| 17               | 6                | 0              | 0.870808                | -0.083157 | -4.119760 |
| 18               | 6                | 0              | 3.971244                | 1.274488  | 3.748705  |
| 19               | 1                | 0              | 2.416528                | -1.916404 | 1.390773  |
| 20               | 1                | 0              | 4.853427                | -1.078004 | 0.450954  |
| 21               | 1                | 0              | 5.115578                | -2.057134 | -1.860223 |
| 22               | 1                | 0              | 3.714516                | -3.800078 | -3.617627 |
| 23               | 1                | 0              | 1.530054                | -4.991448 | -3.815954 |
| 24               | 1                | 0              | -0.183382               | -4.822285 | -2.032479 |

|    |    |   |           |           |           |
|----|----|---|-----------|-----------|-----------|
| 25 | 1  | 0 | 0.232736  | -3.424719 | 0.009085  |
| 26 | 1  | 0 | 3.337014  | 0.627422  | 4.372294  |
| 27 | 1  | 0 | 4.989932  | 1.322986  | 4.153451  |
| 28 | 1  | 0 | 3.518652  | 2.278426  | 3.757389  |
| 29 | 1  | 0 | 0.535295  | 0.921360  | -4.426970 |
| 30 | 1  | 0 | 1.827133  | -0.310995 | -4.604403 |
| 31 | 1  | 0 | 0.095045  | -0.801781 | -4.419619 |
| 32 | 21 | 0 | -1.386752 | 0.377138  | -0.536568 |
| 33 | 8  | 0 | -3.071533 | 1.662256  | -0.952164 |
| 34 | 16 | 0 | -3.975686 | 0.582407  | -1.542670 |
| 35 | 8  | 0 | -4.674287 | 0.868576  | -2.774116 |
| 36 | 8  | 0 | -3.084519 | -0.647720 | -1.477260 |
| 37 | 6  | 0 | -5.258562 | 0.294833  | -0.205950 |
| 38 | 8  | 0 | -1.264379 | -0.795790 | 1.007975  |
| 39 | 16 | 0 | -0.951813 | -1.427247 | 2.406642  |
| 40 | 8  | 0 | 0.262156  | -2.235841 | 2.333728  |
| 41 | 8  | 0 | -1.157907 | -0.465861 | 3.474142  |
| 42 | 6  | 0 | -2.366928 | -2.653340 | 2.489709  |
| 43 | 8  | 0 | -0.342609 | 2.026825  | 0.079913  |
| 44 | 16 | 0 | 0.747301  | 2.881237  | -0.577315 |
| 45 | 8  | 0 | 2.101516  | 2.324029  | -0.284943 |
| 46 | 8  | 0 | 0.452911  | 3.233862  | -1.959168 |
| 47 | 6  | 0 | 0.677078  | 4.440755  | 0.458045  |
| 48 | 9  | 0 | -5.956022 | -0.790452 | -0.500907 |
| 49 | 9  | 0 | -4.638565 | 0.128907  | 0.956762  |
| 50 | 9  | 0 | -6.061654 | 1.343865  | -0.140016 |
| 51 | 9  | 0 | -0.523770 | 4.985219  | 0.332622  |
| 52 | 9  | 0 | 0.907591  | 4.146660  | 1.726752  |
| 53 | 9  | 0 | 1.599186  | 5.282559  | 0.015416  |
| 54 | 9  | 0 | -3.530595 | -2.017959 | 2.409052  |
| 55 | 9  | 0 | -2.299314 | -3.305522 | 3.642364  |
| 56 | 9  | 0 | -2.275226 | -3.523950 | 1.485772  |

TS1' E= -4595.532206

| Center<br>Number | Atomic<br>Number | Atomic<br>Type | Coordinates (Angstroms) |           |           |
|------------------|------------------|----------------|-------------------------|-----------|-----------|
|                  |                  |                | X                       | Y         | Z         |
| 1                | 6                | 0              | 3.650578                | -2.601416 | -2.097680 |
| 2                | 6                | 0              | 2.874802                | -2.127192 | -1.012005 |
| 3                | 6                | 0              | 1.719542                | -2.835791 | -0.647451 |
| 4                | 6                | 0              | 1.366950                | -3.967227 | -1.383259 |
| 5                | 6                | 0              | 2.150225                | -4.412205 | -2.466851 |
| 6                | 6                | 0              | 3.313506                | -3.737906 | -2.838133 |
| 7                | 6                | 0              | 4.691328                | -0.783976 | -1.276950 |
| 8                | 6                | 0              | 3.553372                | -0.946628 | -0.454638 |
| 9                | 7                | 0              | 4.748672                | -1.745041 | -2.219072 |
| 10               | 46               | 0              | 2.524727                | 0.798948  | -0.078641 |
| 11               | 8                | 0              | 2.148874                | 0.916323  | -2.118685 |
| 12               | 8                | 0              | 2.818044                | 0.795511  | 1.903810  |
| 13               | 6                | 0              | 3.400789                | -0.106439 | 2.592534  |
| 14               | 8                | 0              | 4.042143                | -1.072846 | 2.115667  |
| 15               | 6                | 0              | 1.030218                | 0.745171  | -2.639825 |
| 16               | 8                | 0              | -0.007765               | 0.374930  | -1.972398 |
| 17               | 6                | 0              | 0.843537                | 1.010219  | -4.106429 |
| 18               | 6                | 0              | 3.254966                | 0.014151  | 4.090406  |
| 19               | 1                | 0              | 3.861892                | -1.047586 | 0.785394  |
| 20               | 1                | 0              | 5.471809                | -0.025939 | -1.210828 |
| 21               | 1                | 0              | 5.500789                | -1.859908 | -2.889525 |
| 22               | 1                | 0              | 3.933847                | -4.090088 | -3.665930 |
| 23               | 1                | 0              | 1.847589                | -5.304650 | -3.019802 |
| 24               | 1                | 0              | 0.468221                | -4.523880 | -1.107388 |
| 25               | 1                | 0              | 1.121391                | -2.514162 | 0.205216  |
| 26               | 1                | 0              | 2.306852                | -0.481754 | 4.354124  |
| 27               | 1                | 0              | 4.080793                | -0.499269 | 4.598700  |

|    |    |   |           |           |           |
|----|----|---|-----------|-----------|-----------|
| 28 | 1  | 0 | 3.192111  | 1.067405  | 4.392717  |
| 29 | 1  | 0 | 0.317402  | 1.974973  | -4.199130 |
| 30 | 1  | 0 | 1.810212  | 1.076932  | -4.619313 |
| 31 | 1  | 0 | 0.208493  | 0.234074  | -4.556252 |
| 32 | 21 | 0 | -1.417838 | 0.316178  | -0.609439 |
| 33 | 8  | 0 | -3.356457 | 1.155866  | -1.030714 |
| 34 | 16 | 0 | -3.939475 | -0.073594 | -1.725972 |
| 35 | 8  | 0 | -4.657860 | 0.117104  | -2.964866 |
| 36 | 8  | 0 | -2.768895 | -1.040897 | -1.699771 |
| 37 | 6  | 0 | -5.141470 | -0.764774 | -0.464258 |
| 38 | 8  | 0 | -1.077767 | -0.898792 | 0.882394  |
| 39 | 16 | 0 | -0.785392 | -1.311704 | 2.362479  |
| 40 | 8  | 0 | 0.633087  | -1.610845 | 2.537232  |
| 41 | 8  | 0 | -1.491795 | -0.454686 | 3.299357  |
| 42 | 6  | 0 | -1.658899 | -2.970007 | 2.367961  |
| 43 | 8  | 0 | -0.851545 | 2.097004  | 0.208294  |
| 44 | 16 | 0 | 0.188778  | 3.153723  | -0.185438 |
| 45 | 8  | 0 | 1.551501  | 2.747133  | 0.256168  |
| 46 | 8  | 0 | 0.028526  | 3.632154  | -1.552778 |
| 47 | 6  | 0 | -0.248692 | 4.555752  | 0.975476  |
| 48 | 9  | 0 | -5.577361 | -1.943622 | -0.879704 |
| 49 | 9  | 0 | -4.514302 | -0.901246 | 0.698105  |
| 50 | 9  | 0 | -6.158959 | 0.070127  | -0.329074 |
| 51 | 9  | 0 | -1.489017 | 4.950080  | 0.726073  |
| 52 | 9  | 0 | -0.149362 | 4.150709  | 2.229997  |
| 53 | 9  | 0 | 0.590562  | 5.558709  | 0.758333  |
| 54 | 9  | 0 | -2.950272 | -2.809138 | 2.100745  |
| 55 | 9  | 0 | -1.522577 | -3.520279 | 3.567395  |
| 56 | 9  | 0 | -1.121243 | -3.774349 | 1.452694  |

-----  
 Intl' E= -4595.543497

| Center<br>Number | Atomic<br>Number | Atomic<br>Type | Coordinates (Angstroms) |           |           |
|------------------|------------------|----------------|-------------------------|-----------|-----------|
|                  |                  |                | X                       | Y         | Z         |
| 1                | 6                | 0              | 4.320312                | -2.245883 | -1.828645 |
| 2                | 6                | 0              | 3.217891                | -1.680370 | -1.118580 |
| 3                | 6                | 0              | 2.138782                | -2.516954 | -0.766839 |
| 4                | 6                | 0              | 2.173884                | -3.856893 | -1.135326 |
| 5                | 6                | 0              | 3.270455                | -4.392761 | -1.846844 |
| 6                | 6                | 0              | 4.358060                | -3.598861 | -2.196485 |
| 7                | 6                | 0              | 4.774832                | -0.069130 | -1.473418 |
| 8                | 6                | 0              | 3.536430                | -0.281629 | -0.893342 |
| 9                | 7                | 0              | 5.242998                | -1.241269 | -2.029220 |
| 10               | 46               | 0              | 2.365308                | 1.174291  | -0.241259 |
| 11               | 8                | 0              | 1.850070                | 1.501308  | -2.211587 |
| 12               | 8                | 0              | 2.794234                | 0.956981  | 1.757474  |
| 13               | 6                | 0              | 3.390537                | 0.097846  | 2.422551  |
| 14               | 8                | 0              | 4.129296                | -0.841131 | 1.899520  |
| 15               | 6                | 0              | 0.747729                | 1.210613  | -2.712348 |
| 16               | 8                | 0              | -0.183451               | 0.599175  | -2.061966 |
| 17               | 6                | 0              | 0.448875                | 1.609026  | -4.129122 |
| 18               | 6                | 0              | 3.275676                | 0.073422  | 3.913234  |
| 19               | 1                | 0              | 4.085572                | -0.780105 | 0.906319  |
| 20               | 1                | 0              | 5.354936                | 0.848715  | -1.552910 |
| 21               | 1                | 0              | 6.142362                | -1.355818 | -2.477936 |
| 22               | 1                | 0              | 5.212100                | -4.015257 | -2.736977 |
| 23               | 1                | 0              | 3.268444                | -5.450849 | -2.120353 |
| 24               | 1                | 0              | 1.341820                | -4.509141 | -0.860370 |
| 25               | 1                | 0              | 1.301463                | -2.125137 | -0.189849 |
| 26               | 1                | 0              | 2.407198                | -0.565040 | 4.144916  |
| 27               | 1                | 0              | 4.172910                | -0.362588 | 4.370714  |
| 28               | 1                | 0              | 3.078941                | 1.083279  | 4.293276  |
| 29               | 1                | 0              | -0.234480               | 2.473634  | -4.091208 |
| 30               | 1                | 0              | 1.366318                | 1.896973  | -4.655556 |

|    |    |   |           |           |           |
|----|----|---|-----------|-----------|-----------|
| 31 | 1  | 0 | -0.067651 | 0.791719  | -4.652026 |
| 32 | 21 | 0 | -1.507168 | 0.206638  | -0.673123 |
| 33 | 8  | 0 | -3.556940 | 0.793708  | -0.964893 |
| 34 | 16 | 0 | -3.991142 | -0.447385 | -1.744609 |
| 35 | 8  | 0 | -4.778856 | -0.261885 | -2.941242 |
| 36 | 8  | 0 | -2.696830 | -1.236821 | -1.833709 |
| 37 | 6  | 0 | -5.031696 | -1.404088 | -0.512974 |
| 38 | 8  | 0 | -0.925817 | -1.084518 | 0.693324  |
| 39 | 16 | 0 | -0.645840 | -1.439082 | 2.188699  |
| 40 | 8  | 0 | 0.791935  | -1.467994 | 2.448836  |
| 41 | 8  | 0 | -1.548154 | -0.728258 | 3.080138  |
| 42 | 6  | 0 | -1.196004 | -3.229946 | 2.166428  |
| 43 | 8  | 0 | -1.151533 | 1.940870  | 0.327992  |
| 44 | 16 | 0 | -0.285038 | 3.180564  | 0.060461  |
| 45 | 8  | 0 | 1.130065  | 2.921916  | 0.434759  |
| 46 | 8  | 0 | -0.554327 | 3.794098  | -1.233584 |
| 47 | 6  | 0 | -0.896304 | 4.347380  | 1.389866  |
| 48 | 9  | 0 | -5.297828 | -2.601625 | -1.009757 |
| 49 | 9  | 0 | -4.352053 | -1.528527 | 0.621018  |
| 50 | 9  | 0 | -6.158672 | -0.747633 | -0.290559 |
| 51 | 9  | 0 | -2.189582 | 4.569830  | 1.208125  |
| 52 | 9  | 0 | -0.695777 | 3.816312  | 2.585219  |
| 53 | 9  | 0 | -0.228917 | 5.488675  | 1.288339  |
| 54 | 9  | 0 | -2.482490 | -3.305965 | 1.844294  |
| 55 | 9  | 0 | -1.013674 | -3.744372 | 3.376452  |
| 56 | 9  | 0 | -0.481736 | -3.921589 | 1.283284  |

Int2' E= -4902.169196

| Center<br>Number | Atomic<br>Number | Atomic<br>Type | Coordinates (Angstroms) |           |           |
|------------------|------------------|----------------|-------------------------|-----------|-----------|
|                  |                  |                | X                       | Y         | Z         |
| 1                | 6                | 0              | 6.262941                | -0.427651 | -0.403826 |
| 2                | 6                | 0              | 4.845332                | -0.616405 | -0.361863 |
| 3                | 6                | 0              | 4.312476                | -1.819509 | -0.868724 |
| 4                | 6                | 0              | 5.173953                | -2.785358 | -1.378041 |
| 5                | 6                | 0              | 6.570992                | -2.581825 | -1.399558 |
| 6                | 6                | 0              | 7.130640                | -1.402900 | -0.916094 |
| 7                | 6                | 0              | 5.347088                | 1.426110  | 0.487933  |
| 8                | 6                | 0              | 4.292439                | 0.584103  | 0.221466  |
| 9                | 7                | 0              | 6.532585                | 0.815000  | 0.122325  |
| 10               | 46               | 0              | 2.421009                | 0.928829  | 0.773753  |
| 11               | 8                | 0              | 0.536409                | 1.437817  | 1.773176  |
| 12               | 8                | 0              | 2.850943                | -0.214694 | 2.530718  |
| 13               | 6                | 0              | 2.997146                | -1.362251 | 2.955851  |
| 14               | 8                | 0              | 2.585288                | -2.446228 | 2.359099  |
| 15               | 6                | 0              | -0.646302               | 1.082142  | 1.741374  |
| 16               | 8                | 0              | -1.069772               | 0.116026  | 0.987611  |
| 17               | 6                | 0              | -1.677590               | 1.789148  | 2.583508  |
| 18               | 6                | 0              | 3.714475                | -1.620864 | 4.250798  |
| 19               | 1                | 0              | 2.077346                | -2.298201 | 1.518943  |
| 20               | 1                | 0              | 5.354588                | 2.433822  | 0.895169  |
| 21               | 1                | 0              | 7.448116                | 1.239812  | 0.180176  |
| 22               | 1                | 0              | 8.211469                | -1.239700 | -0.938708 |
| 23               | 1                | 0              | 7.222539                | -3.358855 | -1.807165 |
| 24               | 1                | 0              | 4.760073                | -3.715844 | -1.774380 |
| 25               | 1                | 0              | 3.236677                | -1.990077 | -0.875594 |
| 26               | 1                | 0              | 3.223319                | -2.428746 | 4.810143  |
| 27               | 1                | 0              | 4.738673                | -1.952876 | 4.013108  |
| 28               | 1                | 0              | 3.767030                | -0.701423 | 4.845237  |
| 29               | 1                | 0              | -2.342249               | 1.060176  | 3.069387  |
| 30               | 1                | 0              | -1.196160               | 2.439052  | 3.323857  |
| 31               | 1                | 0              | -2.289428               | 2.404925  | 1.904752  |
| 32               | 21               | 0              | -2.451195               | -0.817669 | -0.028667 |
| 33               | 8                | 0              | -4.315477               | -1.968305 | -0.317418 |

|    |    |   |           |           |           |
|----|----|---|-----------|-----------|-----------|
| 34 | 16 | 0 | -4.792539 | -1.831810 | 1.115310  |
| 35 | 8  | 0 | -5.282793 | -3.001879 | 1.806193  |
| 36 | 8  | 0 | -3.655664 | -1.037774 | 1.760404  |
| 37 | 6  | 0 | -6.199747 | -0.596617 | 1.027210  |
| 38 | 8  | 0 | -2.850638 | 0.651000  | -1.280100 |
| 39 | 16 | 0 | -2.402849 | 2.083899  | -1.713529 |
| 40 | 8  | 0 | -1.417856 | 2.627563  | -0.774640 |
| 41 | 8  | 0 | -2.177411 | 2.158837  | -3.144697 |
| 42 | 6  | 0 | -3.991399 | 3.008351  | -1.355347 |
| 43 | 8  | 0 | -1.255922 | -2.281475 | -0.739750 |
| 44 | 16 | 0 | 0.257622  | -2.398925 | -0.998248 |
| 45 | 8  | 0 | 0.737258  | -1.407073 | -1.954214 |
| 46 | 8  | 0 | 0.994680  | -2.588443 | 0.261486  |
| 47 | 6  | 0 | 0.335912  | -4.061418 | -1.852885 |
| 48 | 9  | 0 | -6.623647 | -0.335006 | 2.254735  |
| 49 | 9  | 0 | -5.763714 | 0.522507  | 0.458541  |
| 50 | 9  | 0 | -7.186203 | -1.107862 | 0.309757  |
| 51 | 9  | 0 | -0.169945 | -5.000416 | -1.066801 |
| 52 | 9  | 0 | -0.343373 | -4.013950 | -2.988429 |
| 53 | 9  | 0 | 1.611000  | -4.335548 | -2.107602 |
| 54 | 9  | 0 | -4.986926 | 2.520163  | -2.081322 |
| 55 | 9  | 0 | -3.818563 | 4.291788  | -1.644848 |
| 56 | 9  | 0 | -4.296619 | 2.891783  | -0.059986 |
| 57 | 6  | 0 | 1.928999  | 2.583217  | -0.588600 |
| 58 | 1  | 0 | 0.919545  | 2.841139  | -0.259597 |
| 59 | 6  | 0 | 2.141279  | 1.446534  | -1.351356 |
| 60 | 1  | 0 | 3.081398  | 1.325268  | -1.893025 |
| 61 | 1  | 0 | 1.313278  | 0.792022  | -1.632886 |
| 62 | 6  | 0 | 2.927057  | 3.699784  | -0.523215 |
| 63 | 8  | 0 | 3.984709  | 3.742481  | -1.104133 |
| 64 | 8  | 0 | 2.466954  | 4.684249  | 0.268411  |
| 65 | 6  | 0 | 3.290463  | 5.844214  | 0.385937  |
| 66 | 1  | 0 | 3.482400  | 6.287064  | -0.602971 |
| 67 | 1  | 0 | 2.738270  | 6.547837  | 1.020336  |
| 68 | 1  | 0 | 4.257254  | 5.593108  | 0.848811  |

TS2' E= -4902.158415

| Center<br>Number | Atomic<br>Number | Atomic<br>Type | Coordinates (Angstroms) |           |           |
|------------------|------------------|----------------|-------------------------|-----------|-----------|
|                  |                  |                | X                       | Y         | Z         |
| 1                | 6                | 0              | 6.298098                | 0.156949  | -0.433870 |
| 2                | 6                | 0              | 4.925103                | -0.235504 | -0.470168 |
| 3                | 6                | 0              | 4.606312                | -1.539060 | -0.900192 |
| 4                | 6                | 0              | 5.635288                | -2.404137 | -1.260330 |
| 5                | 6                | 0              | 6.986453                | -1.998849 | -1.204326 |
| 6                | 6                | 0              | 7.334621                | -0.715227 | -0.792847 |
| 7                | 6                | 0              | 5.067201                | 1.923313  | 0.227698  |
| 8                | 6                | 0              | 4.160708                | 0.908251  | -0.021239 |
| 9                | 7                | 0              | 6.345361                | 1.468622  | -0.006437 |
| 10               | 46               | 0              | 2.336751                | 0.906393  | 0.833974  |
| 11               | 8                | 0              | 0.599704                | 1.062794  | 2.102803  |
| 12               | 8                | 0              | 3.187844                | -0.327328 | 2.413784  |
| 13               | 6                | 0              | 3.340080                | -1.519808 | 2.674598  |
| 14               | 8                | 0              | 2.762449                | -2.511692 | 2.045806  |
| 15               | 6                | 0              | -0.606618               | 0.823064  | 1.968665  |
| 16               | 8                | 0              | -1.109234               | 0.325954  | 0.883498  |
| 17               | 6                | 0              | -1.567206               | 1.123353  | 3.091305  |
| 18               | 6                | 0              | 4.264096                | -1.966123 | 3.773378  |
| 19               | 1                | 0              | 2.133791                | -2.237075 | 1.327775  |
| 20               | 1                | 0              | 4.878389                | 2.953258  | 0.525652  |
| 21               | 1                | 0              | 7.187879                | 2.017633  | 0.102886  |
| 22               | 1                | 0              | 8.379971                | -0.397775 | -0.755092 |
| 23               | 1                | 0              | 7.771636                | -2.701580 | -1.494033 |
| 24               | 1                | 0              | 5.393367                | -3.414670 | -1.598455 |

|    |    |   |           |           |           |
|----|----|---|-----------|-----------|-----------|
| 25 | 1  | 0 | 3.566502  | -1.859278 | -0.969311 |
| 26 | 1  | 0 | 3.812186  | -2.787951 | 4.346051  |
| 27 | 1  | 0 | 5.187620  | -2.351291 | 3.310804  |
| 28 | 1  | 0 | 4.513312  | -1.120926 | 4.425120  |
| 29 | 1  | 0 | -2.189125 | 0.239123  | 3.295352  |
| 30 | 1  | 0 | -1.026362 | 1.438298  | 3.991371  |
| 31 | 1  | 0 | -2.243985 | 1.928324  | 2.763443  |
| 32 | 21 | 0 | -2.396835 | -0.653518 | -0.218535 |
| 33 | 8  | 0 | -3.945858 | -2.199925 | -0.503087 |
| 34 | 16 | 0 | -4.367969 | -2.261507 | 0.951510  |
| 35 | 8  | 0 | -4.534745 | -3.551251 | 1.580824  |
| 36 | 8  | 0 | -3.411352 | -1.262620 | 1.604690  |
| 37 | 6  | 0 | -6.026484 | -1.388995 | 1.000837  |
| 38 | 8  | 0 | -3.291189 | 0.801586  | -1.207045 |
| 39 | 16 | 0 | -2.803788 | 2.048408  | -2.017348 |
| 40 | 8  | 0 | -1.351509 | 1.996388  | -2.179351 |
| 41 | 8  | 0 | -3.673785 | 2.326046  | -3.143908 |
| 42 | 6  | 0 | -3.146598 | 3.388687  | -0.748103 |
| 43 | 8  | 0 | -1.051127 | -1.738446 | -1.269202 |
| 44 | 16 | 0 | 0.441643  | -2.086862 | -1.179692 |
| 45 | 8  | 0 | 1.273528  | -1.275979 | -2.060214 |
| 46 | 8  | 0 | 0.846957  | -2.252092 | 0.230155  |
| 47 | 6  | 0 | 0.446280  | -3.816081 | -1.893965 |
| 48 | 9  | 0 | -6.421045 | -1.280428 | 2.261458  |
| 49 | 9  | 0 | -5.901323 | -0.180802 | 0.466991  |
| 50 | 9  | 0 | -6.908346 | -2.095441 | 0.312914  |
| 51 | 9  | 0 | -0.358075 | -4.599950 | -1.190219 |
| 52 | 9  | 0 | 0.050033  | -3.784899 | -3.156290 |
| 53 | 9  | 0 | 1.689648  | -4.284040 | -1.827781 |
| 54 | 9  | 0 | -4.453682 | 3.539998  | -0.579226 |
| 55 | 9  | 0 | -2.621382 | 4.534225  | -1.169357 |
| 56 | 9  | 0 | -2.594550 | 3.069849  | 0.427390  |
| 57 | 6  | 0 | 1.487852  | 2.167216  | -0.642599 |
| 58 | 1  | 0 | 0.484775  | 1.745957  | -0.739459 |
| 59 | 6  | 0 | 2.537323  | 1.652018  | -1.417903 |
| 60 | 1  | 0 | 3.333933  | 2.320298  | -1.734786 |
| 61 | 1  | 0 | 2.381536  | 0.735448  | -1.989091 |
| 62 | 6  | 0 | 1.562607  | 3.589916  | -0.187941 |
| 63 | 8  | 0 | 2.559012  | 4.279314  | -0.208742 |
| 64 | 8  | 0 | 0.368604  | 4.016600  | 0.249885  |
| 65 | 6  | 0 | 0.292819  | 5.371498  | 0.693610  |
| 66 | 1  | 0 | 0.632222  | 6.059129  | -0.095143 |
| 67 | 1  | 0 | -0.762345 | 5.553063  | 0.928852  |
| 68 | 1  | 0 | 0.918474  | 5.524544  | 1.586306  |

Int3' E= -4902.216631

| Center<br>Number | Atomic<br>Number | Atomic<br>Type | Coordinates (Angstroms) |           |           |
|------------------|------------------|----------------|-------------------------|-----------|-----------|
|                  |                  |                | X                       | Y         | Z         |
| 1                | 6                | 0              | -5.592881               | -1.038079 | -0.708940 |
| 2                | 6                | 0              | -4.394882               | -0.711166 | -1.397207 |
| 3                | 6                | 0              | -4.407931               | 0.318647  | -2.350871 |
| 4                | 6                | 0              | -5.605321               | 0.992299  | -2.589928 |
| 5                | 6                | 0              | -6.782549               | 0.659564  | -1.890814 |
| 6                | 6                | 0              | -6.794244               | -0.358026 | -0.936140 |
| 7                | 6                | 0              | -3.999482               | -2.437610 | 0.061316  |
| 8                | 6                | 0              | -3.355235               | -1.609662 | -0.893223 |
| 9                | 7                | 0              | -5.316710               | -2.094859 | 0.148824  |
| 10               | 46               | 0              | -2.419961               | -0.866536 | 0.943087  |
| 11               | 8                | 0              | -1.183139               | -0.350516 | 2.620531  |
| 12               | 8                | 0              | -4.077293               | 0.264383  | 1.925971  |
| 13               | 6                | 0              | -4.483678               | 1.424206  | 1.875167  |
| 14               | 8                | 0              | -3.864679               | 2.416579  | 1.286986  |
| 15               | 6                | 0              | -0.022714               | 0.053861  | 2.757612  |



|    |    |   |           |           |           |
|----|----|---|-----------|-----------|-----------|
| 16 | 8  | 0 | 0.763376  | 0.321652  | 1.768031  |
| 17 | 6  | 0 | 0.543949  | 0.280636  | 4.137158  |
| 18 | 6  | 0 | -5.802180 | 1.822557  | 2.481756  |
| 19 | 1  | 0 | -2.985860 | 2.179864  | 0.882125  |
| 20 | 1  | 0 | -3.606607 | -3.349076 | 0.512260  |
| 21 | 1  | 0 | -5.967601 | -2.484351 | 0.818980  |
| 22 | 1  | 0 | -7.709043 | -0.622018 | -0.400027 |
| 23 | 1  | 0 | -7.705555 | 1.205071  | -2.102640 |
| 24 | 1  | 0 | -5.631908 | 1.796558  | -3.328731 |
| 25 | 1  | 0 | -3.491886 | 0.602421  | -2.870633 |
| 26 | 1  | 0 | -5.728400 | 2.812698  | 2.952075  |
| 27 | 1  | 0 | -6.546078 | 1.892390  | 1.671119  |
| 28 | 1  | 0 | -6.129627 | 1.067543  | 3.206179  |
| 29 | 1  | 0 | 0.720782  | 1.359434  | 4.276875  |
| 30 | 1  | 0 | -0.145640 | -0.082212 | 4.908411  |
| 31 | 1  | 0 | 1.519953  | -0.220496 | 4.221824  |
| 32 | 21 | 0 | 2.029937  | 0.691896  | 0.349810  |
| 33 | 8  | 0 | 3.375437  | 2.380428  | 0.435438  |
| 34 | 16 | 0 | 4.443126  | 1.722554  | 1.307678  |
| 35 | 8  | 0 | 4.992113  | 2.487523  | 2.404618  |
| 36 | 8  | 0 | 3.835571  | 0.363736  | 1.598289  |
| 37 | 6  | 0 | 5.834112  | 1.359896  | 0.104264  |
| 38 | 8  | 0 | 2.326454  | -0.839375 | -0.808151 |
| 39 | 16 | 0 | 2.539342  | -1.893040 | -1.943644 |
| 40 | 8  | 0 | 1.360657  | -2.739710 | -2.081551 |
| 41 | 8  | 0 | 3.170430  | -1.283922 | -3.102114 |
| 42 | 6  | 0 | 3.851783  | -2.943769 | -1.116521 |
| 43 | 8  | 0 | 0.768428  | 1.803003  | -0.800851 |
| 44 | 16 | 0 | -0.700367 | 2.182593  | -0.990147 |
| 45 | 8  | 0 | -1.326433 | 1.489598  | -2.110075 |
| 46 | 8  | 0 | -1.408527 | 2.206962  | 0.309042  |
| 47 | 6  | 0 | -0.540166 | 3.979389  | -1.486933 |
| 48 | 9  | 0 | 6.738175  | 0.599899  | 0.702573  |
| 49 | 9  | 0 | 5.337605  | 0.724269  | -0.949505 |
| 50 | 9  | 0 | 6.387856  | 2.499653  | -0.279133 |
| 51 | 9  | 0 | 0.102998  | 4.654668  | -0.543603 |
| 52 | 9  | 0 | 0.118592  | 4.075006  | -2.631802 |
| 53 | 9  | 0 | -1.762229 | 4.482563  | -1.633895 |
| 54 | 9  | 0 | 4.910658  | -2.198239 | -0.813743 |
| 55 | 9  | 0 | 4.219109  | -3.908198 | -1.951718 |
| 56 | 9  | 0 | 3.374789  | -3.492243 | -0.000147 |
| 57 | 6  | 0 | -1.082700 | -1.860768 | -0.227162 |
| 58 | 1  | 0 | -0.217300 | -1.201608 | -0.320662 |
| 59 | 6  | 0 | -1.976717 | -1.942050 | -1.458797 |
| 60 | 1  | 0 | -1.957943 | -2.928608 | -1.946993 |
| 61 | 1  | 0 | -1.679792 | -1.179724 | -2.188848 |
| 62 | 6  | 0 | -0.729750 | -3.154955 | 0.420723  |
| 63 | 8  | 0 | -1.379083 | -4.179116 | 0.336728  |
| 64 | 8  | 0 | 0.397056  | -3.062732 | 1.152855  |
| 65 | 6  | 0 | 0.831822  | -4.258499 | 1.799227  |
| 66 | 1  | 0 | 1.016316  | -5.052450 | 1.060803  |
| 67 | 1  | 0 | 1.763981  | -4.003413 | 2.317457  |
| 68 | 1  | 0 | 0.076724  | -4.614059 | 2.517070  |

Int4' E= -4902.196269

| Center<br>Number | Atomic<br>Number | Atomic<br>Type | Coordinates (Angstroms) |           |           |
|------------------|------------------|----------------|-------------------------|-----------|-----------|
|                  |                  |                | X                       | Y         | Z         |
| 1                | 6                | 0              | 4.445694                | -1.460300 | -2.572793 |
| 2                | 6                | 0              | 4.746785                | -0.307133 | -1.791606 |
| 3                | 6                | 0              | 6.090260                | -0.026892 | -1.478201 |
| 4                | 6                | 0              | 7.083814                | -0.885749 | -1.939944 |
| 5                | 6                | 0              | 6.763758                | -2.023379 | -2.712230 |
| 6                | 6                | 0              | 5.444161                | -2.324959 | -3.039754 |

|    |    |   |           |           |           |
|----|----|---|-----------|-----------|-----------|
| 7  | 6  | 0 | 2.504121  | -0.439628 | -2.085415 |
| 8  | 6  | 0 | 3.484851  | 0.332309  | -1.493594 |
| 9  | 7  | 0 | 3.076493  | -1.497299 | -2.735371 |
| 10 | 46 | 0 | 2.137129  | 1.611363  | 1.368301  |
| 11 | 8  | 0 | 0.400632  | 2.488019  | 2.206163  |
| 12 | 8  | 0 | 2.672598  | 0.916664  | 3.370179  |
| 13 | 6  | 0 | 2.498172  | -0.047841 | 4.112720  |
| 14 | 8  | 0 | 2.001883  | -1.201287 | 3.743202  |
| 15 | 6  | 0 | -0.759214 | 2.081630  | 2.020536  |
| 16 | 8  | 0 | -1.019950 | 1.014334  | 1.348378  |
| 17 | 6  | 0 | -1.927492 | 2.843869  | 2.588980  |
| 18 | 6  | 0 | 2.858715  | 0.007789  | 5.571983  |
| 19 | 1  | 0 | 1.834370  | -1.282075 | 2.763199  |
| 20 | 1  | 0 | 1.425559  | -0.318851 | -2.085942 |
| 21 | 1  | 0 | 2.545040  | -2.246012 | -3.161652 |
| 22 | 1  | 0 | 5.196953  | -3.204854 | -3.638684 |
| 23 | 1  | 0 | 7.566062  | -2.678695 | -3.060267 |
| 24 | 1  | 0 | 8.130239  | -0.678124 | -1.703011 |
| 25 | 1  | 0 | 6.354667  | 0.850828  | -0.881987 |
| 26 | 1  | 0 | 1.988733  | -0.286230 | 6.178431  |
| 27 | 1  | 0 | 3.656862  | -0.723056 | 5.776286  |
| 28 | 1  | 0 | 3.192939  | 1.015326  | 5.843331  |
| 29 | 1  | 0 | -2.572503 | 2.167485  | 3.169888  |
| 30 | 1  | 0 | -1.585333 | 3.679720  | 3.210069  |
| 31 | 1  | 0 | -2.541471 | 3.218059  | 1.754396  |
| 32 | 21 | 0 | -1.919094 | -0.293224 | 0.194200  |
| 33 | 8  | 0 | -3.563417 | -0.949967 | 1.425524  |
| 34 | 16 | 0 | -4.502375 | 0.216131  | 1.129955  |
| 35 | 8  | 0 | -5.080528 | 0.913823  | 2.260605  |
| 36 | 8  | 0 | -3.728915 | 1.026138  | 0.109106  |
| 37 | 6  | 0 | -5.922383 | -0.552873 | 0.177030  |
| 38 | 8  | 0 | -2.590890 | -1.210184 | -1.729028 |
| 39 | 16 | 0 | -1.623822 | -0.440386 | -2.598923 |
| 40 | 8  | 0 | -0.897898 | 0.449380  | -1.585613 |
| 41 | 8  | 0 | -0.804642 | -1.156351 | -3.554567 |
| 42 | 6  | 0 | -2.684915 | 0.748645  | -3.587962 |
| 43 | 8  | 0 | -0.746821 | -1.870984 | 0.653527  |
| 44 | 16 | 0 | 0.623494  | -2.538650 | 0.468825  |
| 45 | 8  | 0 | 0.878631  | -2.938988 | -0.906823 |
| 46 | 8  | 0 | 1.678233  | -1.787786 | 1.182475  |
| 47 | 6  | 0 | 0.364948  | -4.106505 | 1.459507  |
| 48 | 9  | 0 | -6.727775 | 0.416542  | -0.234512 |
| 49 | 9  | 0 | -5.457772 | -1.221683 | -0.865704 |
| 50 | 9  | 0 | -6.582654 | -1.373571 | 0.980156  |
| 51 | 9  | 0 | 0.160122  | -3.798142 | 2.735780  |
| 52 | 9  | 0 | -0.680804 | -4.769233 | 0.988718  |
| 53 | 9  | 0 | 1.452546  | -4.859716 | 1.357335  |
| 54 | 9  | 0 | -3.464737 | 0.047878  | -4.397991 |
| 55 | 9  | 0 | -1.889368 | 1.534497  | -4.299984 |
| 56 | 9  | 0 | -3.427166 | 1.482616  | -2.774606 |
| 57 | 6  | 0 | 2.009359  | 2.237641  | -0.562208 |
| 58 | 1  | 0 | 1.130975  | 1.796466  | -1.045363 |
| 59 | 6  | 0 | 3.303856  | 1.545037  | -0.659196 |
| 60 | 1  | 0 | 3.550682  | 1.151638  | 0.511725  |
| 61 | 1  | 0 | 4.139549  | 2.258023  | -0.725733 |
| 62 | 6  | 0 | 2.030845  | 3.732089  | -0.564458 |
| 63 | 8  | 0 | 3.021486  | 4.419847  | -0.456276 |
| 64 | 8  | 0 | 0.787752  | 4.232800  | -0.687619 |
| 65 | 6  | 0 | 0.676071  | 5.655939  | -0.654880 |
| 66 | 1  | 0 | 1.276620  | 6.113991  | -1.455047 |
| 67 | 1  | 0 | -0.387461 | 5.882520  | -0.799222 |
| 68 | 1  | 0 | 1.023192  | 6.051921  | 0.311733  |

TS3' E= -4902.19134

| Center<br>Number | Atomic<br>Number | Atomic<br>Type | Coordinates (Angstroms) |           |           |
|------------------|------------------|----------------|-------------------------|-----------|-----------|
|                  |                  |                | X                       | Y         | Z         |
| 1                | 6                | 0              | 4.340277                | -1.783751 | -2.308074 |
| 2                | 6                | 0              | 4.690127                | -0.531575 | -1.730458 |
| 3                | 6                | 0              | 6.044660                | -0.253308 | -1.475929 |
| 4                | 6                | 0              | 7.001128                | -1.212996 | -1.799166 |
| 5                | 6                | 0              | 6.632121                | -2.448271 | -2.372367 |
| 6                | 6                | 0              | 5.297884                | -2.750540 | -2.635742 |
| 7                | 6                | 0              | 2.434678                | -0.640305 | -1.982329 |
| 8                | 6                | 0              | 3.449825                | 0.191782  | -1.527535 |
| 9                | 7                | 0              | 2.963699                | -1.799270 | -2.450941 |
| 10               | 46               | 0              | 2.221459                | 1.727891  | 1.196882  |
| 11               | 8                | 0              | 0.422174                | 2.727956  | 1.873697  |
| 12               | 8                | 0              | 2.584195                | 1.210334  | 3.254922  |
| 13               | 6                | 0              | 2.492282                | 0.244432  | 4.011426  |
| 14               | 8                | 0              | 2.141346                | -0.964407 | 3.657853  |
| 15               | 6                | 0              | -0.738155               | 2.313755  | 1.758036  |
| 16               | 8                | 0              | -1.015786               | 1.158621  | 1.243447  |
| 17               | 6                | 0              | -1.903836               | 3.151517  | 2.217134  |
| 18               | 6                | 0              | 2.792310                | 0.373524  | 5.479679  |
| 19               | 1                | 0              | 1.962264                | -1.089884 | 2.684950  |
| 20               | 1                | 0              | 1.360551                | -0.483236 | -1.992848 |
| 21               | 1                | 0              | 2.398043                | -2.593474 | -2.727765 |
| 22               | 1                | 0              | 5.010220                | -3.706516 | -3.079554 |
| 23               | 1                | 0              | 7.406191                | -3.180539 | -2.614409 |
| 24               | 1                | 0              | 8.057077                | -1.007827 | -1.606895 |
| 25               | 1                | 0              | 6.347916                | 0.699077  | -1.033208 |
| 26               | 1                | 0              | 1.921456                | 0.038630  | 6.063545  |
| 27               | 1                | 0              | 3.630639                | -0.291632 | 5.738981  |
| 28               | 1                | 0              | 3.042514                | 1.411098  | 5.727019  |
| 29               | 1                | 0              | -2.546322               | 2.567672  | 2.893505  |
| 30               | 1                | 0              | -1.555729               | 4.066396  | 2.710581  |
| 31               | 1                | 0              | -2.523499               | 3.404635  | 1.342255  |
| 32               | 21               | 0              | -1.926862               | -0.242075 | 0.236300  |
| 33               | 8                | 0              | -3.550976               | -0.791475 | 1.548030  |
| 34               | 16               | 0              | -4.498307               | 0.340193  | 1.161612  |
| 35               | 8                | 0              | -5.061111               | 1.139204  | 2.231229  |
| 36               | 8                | 0              | -3.745781               | 1.053308  | 0.056094  |
| 37               | 6                | 0              | -5.930644               | -0.517241 | 0.308246  |
| 38               | 8                | 0              | -2.623261               | -1.315267 | -1.602599 |
| 39               | 16               | 0              | -1.658018               | -0.630502 | -2.541547 |
| 40               | 8                | 0              | -0.908817               | 0.329996  | -1.613535 |
| 41               | 8                | 0              | -0.857462               | -1.430051 | -3.445698 |
| 42               | 6                | 0              | -2.717984               | 0.486934  | -3.611494 |
| 43               | 8                | 0              | -0.753929               | -1.789540 | 0.812719  |
| 44               | 16               | 0              | 0.573642                | -2.524832 | 0.596918  |
| 45               | 8                | 0              | 0.721758                | -3.044795 | -0.756716 |
| 46               | 8                | 0              | 1.703745                | -1.765747 | 1.170728  |
| 47               | 6                | 0              | 0.327858                | -3.998689 | 1.724427  |
| 48               | 9                | 0              | -6.740109               | 0.407689  | -0.189120 |
| 49               | 9                | 0              | -5.479713               | -1.288859 | -0.667511 |
| 50               | 9                | 0              | -6.582613               | -1.251762 | 1.197306  |
| 51               | 9                | 0              | 0.198897                | -3.582817 | 2.979512  |
| 52               | 9                | 0              | -0.757817               | -4.665839 | 1.362669  |
| 53               | 9                | 0              | 1.389013                | -4.790319 | 1.629047  |
| 54               | 9                | 0              | -3.525181               | -0.267140 | -4.343231 |
| 55               | 9                | 0              | -1.924042               | 1.193679  | -4.404035 |
| 56               | 9                | 0              | -3.431841               | 1.302276  | -2.851895 |
| 57               | 6                | 0              | 2.090858                | 2.248084  | -0.822004 |
| 58               | 1                | 0              | 1.161492                | 1.827664  | -1.219164 |
| 59               | 6                | 0              | 3.306452                | 1.500964  | -0.922205 |
| 60               | 1                | 0              | 3.577223                | 1.147238  | 0.688544  |
| 61               | 1                | 0              | 4.213198                | 2.115102  | -0.885856 |
| 62               | 6                | 0              | 2.189639                | 3.738812  | -0.862137 |
| 63               | 8                | 0              | 3.213774                | 4.378756  | -0.777301 |
| 64               | 8                | 0              | 0.973575                | 4.295303  | -1.010157 |

|    |   |   |           |          |           |
|----|---|---|-----------|----------|-----------|
| 65 | 6 | 0 | 0.932257  | 5.722163 | -1.028941 |
| 66 | 1 | 0 | 1.562939  | 6.121763 | -1.837228 |
| 67 | 1 | 0 | -0.117269 | 5.995392 | -1.193814 |
| 68 | 1 | 0 | 1.287808  | 6.134686 | -0.072409 |

Int5' E= -4902.196407

| Center<br>Number | Atomic<br>Number | Atomic<br>Type | Coordinates (Angstroms) |           |           |
|------------------|------------------|----------------|-------------------------|-----------|-----------|
|                  |                  |                | X                       | Y         | Z         |
| 1                | 6                | 0              | -2.497091               | 3.484758  | -0.936558 |
| 2                | 6                | 0              | -3.551633               | 2.641987  | -0.502035 |
| 3                | 6                | 0              | -4.601509               | 3.195065  | 0.250642  |
| 4                | 6                | 0              | -4.565241               | 4.553888  | 0.552497  |
| 5                | 6                | 0              | -3.502588               | 5.373078  | 0.114535  |
| 6                | 6                | 0              | -2.453183               | 4.850474  | -0.636190 |
| 7                | 6                | 0              | -2.038929               | 1.420229  | -1.689061 |
| 8                | 6                | 0              | -3.252268               | 1.308721  | -1.000737 |
| 9                | 7                | 0              | -1.606817               | 2.702002  | -1.654469 |
| 10               | 46               | 0              | -2.868041               | -1.669800 | 0.189474  |
| 11               | 8                | 0              | -1.351116               | -2.363043 | -1.282784 |
| 12               | 8                | 0              | -1.834063               | -2.737717 | 1.707283  |
| 13               | 6                | 0              | -1.372022               | -2.587887 | 2.840865  |
| 14               | 8                | 0              | -1.246247               | -1.447322 | 3.458451  |
| 15               | 6                | 0              | -0.119128               | -2.423260 | -1.222963 |
| 16               | 8                | 0              | 0.571407                | -1.818548 | -0.303462 |
| 17               | 6                | 0              | 0.666457                | -3.204164 | -2.247073 |
| 18               | 6                | 0              | -0.867231               | -3.764620 | 3.628245  |
| 19               | 1                | 0              | -1.442734               | -0.638290 | 2.901970  |
| 20               | 1                | 0              | -1.439170               | 0.647528  | -2.166250 |
| 21               | 1                | 0              | -0.675968               | 2.995072  | -1.950267 |
| 22               | 1                | 0              | -1.624485               | 5.477483  | -0.971658 |
| 23               | 1                | 0              | -3.502600               | 6.435040  | 0.371883  |
| 24               | 1                | 0              | -5.372468               | 4.996327  | 1.141356  |
| 25               | 1                | 0              | -5.431073               | 2.574841  | 0.599051  |
| 26               | 1                | 0              | 0.234331                | -3.766588 | 3.583115  |
| 27               | 1                | 0              | -1.153641               | -3.665609 | 4.684606  |
| 28               | 1                | 0              | -1.247625               | -4.700478 | 3.203042  |
| 29               | 1                | 0              | 1.401606                | -3.849441 | -1.743792 |
| 30               | 1                | 0              | -0.001976               | -3.797390 | -2.882245 |
| 31               | 1                | 0              | 1.236601                | -2.493470 | -2.866985 |
| 32               | 21               | 0              | 1.881939                | -0.414892 | 0.039016  |
| 33               | 8                | 0              | 3.264926                | -1.338896 | 1.411995  |
| 34               | 16               | 0              | 4.180158                | -1.970045 | 0.365744  |
| 35               | 8                | 0              | 4.522593                | -3.367083 | 0.517870  |
| 36               | 8                | 0              | 3.558010                | -1.514510 | -0.939514 |
| 37               | 6                | 0              | 5.768460                | -0.985137 | 0.504723  |
| 38               | 8                | 0              | 2.817684                | 1.519723  | -0.596374 |
| 39               | 16               | 0              | 2.042712                | 1.657491  | -1.884604 |
| 40               | 8                | 0              | 1.186713                | 0.400871  | -1.916835 |
| 41               | 8                | 0              | 1.365376                | 2.913565  | -2.170936 |
| 42               | 6                | 0              | 3.303024                | 1.446240  | -3.258208 |
| 43               | 8                | 0              | 0.906606                | 0.510847  | 1.541797  |
| 44               | 16               | 0              | -0.155057               | 1.554030  | 1.925529  |
| 45               | 8                | 0              | -0.175848               | 2.695647  | 1.024912  |
| 46               | 8                | 0              | -1.432732               | 0.887237  | 2.256267  |
| 47               | 6                | 0              | 0.529977                | 2.149169  | 3.563264  |
| 48               | 9                | 0              | 6.599125                | -1.372234 | -0.452559 |
| 49               | 9                | 0              | 5.501683                | 0.306528  | 0.370154  |
| 50               | 9                | 0              | 6.315070                | -1.208659 | 1.690141  |
| 51               | 9                | 0              | 0.583628                | 1.135614  | 4.419760  |
| 52               | 9                | 0              | 1.746782                | 2.646133  | 3.386704  |
| 53               | 9                | 0              | -0.269340               | 3.091984  | 4.043858  |
| 54               | 9                | 0              | 4.183598                | 2.432205  | -3.181671 |
| 55               | 9                | 0              | 2.667919                | 1.499832  | -4.421254 |

|    |   |   |           |           |           |
|----|---|---|-----------|-----------|-----------|
| 56 | 9 | 0 | 3.918755  | 0.282659  | -3.139044 |
| 57 | 6 | 0 | -4.051625 | -1.079988 | -1.479253 |
| 58 | 1 | 0 | -3.387530 | -1.242797 | -2.331769 |
| 59 | 6 | 0 | -4.072420 | 0.152766  | -0.804148 |
| 60 | 1 | 0 | -3.984094 | -1.358869 | 1.163813  |
| 61 | 1 | 0 | -4.951760 | 0.304154  | -0.169907 |
| 62 | 6 | 0 | -5.286323 | -1.924349 | -1.464128 |
| 63 | 8 | 0 | -6.283362 | -1.710222 | -0.814281 |
| 64 | 8 | 0 | -5.155359 | -2.969378 | -2.303534 |
| 65 | 6 | 0 | -6.268275 | -3.859131 | -2.378680 |
| 66 | 1 | 0 | -7.176113 | -3.325707 | -2.698882 |
| 67 | 1 | 0 | -5.997118 | -4.626482 | -3.114151 |
| 68 | 1 | 0 | -6.464717 | -4.322353 | -1.399556 |

TS4' E= -5052.571584

| Center<br>Number | Atomic<br>Number | Atomic<br>Type | Coordinates (Angstroms) |           |           |
|------------------|------------------|----------------|-------------------------|-----------|-----------|
|                  |                  |                | X                       | Y         | Z         |
| 1                | 6                | 0              | -2.311152               | 3.148765  | -1.755560 |
| 2                | 6                | 0              | -3.379872               | 2.294735  | -1.380074 |
| 3                | 6                | 0              | -4.565917               | 2.862463  | -0.885448 |
| 4                | 6                | 0              | -4.650465               | 4.249763  | -0.782755 |
| 5                | 6                | 0              | -3.573208               | 5.078996  | -1.157235 |
| 6                | 6                | 0              | -2.385209               | 4.540018  | -1.647792 |
| 7                | 6                | 0              | -1.622893               | 1.045314  | -2.123734 |
| 8                | 6                | 0              | -2.929536               | 0.932715  | -1.621502 |
| 9                | 7                | 0              | -1.272693               | 2.344859  | -2.205725 |
| 10               | 46               | 0              | -2.741062               | -1.534759 | 0.343711  |
| 11               | 8                | 0              | -1.075816               | -3.019125 | -0.071000 |
| 12               | 8                | 0              | -2.327112               | -1.786162 | 2.440180  |
| 13               | 6                | 0              | -2.086937               | -1.217003 | 3.505755  |
| 14               | 8                | 0              | -1.786417               | 0.046137  | 3.635915  |
| 15               | 6                | 0              | 0.143263                | -2.908216 | 0.068315  |
| 16               | 8                | 0              | 0.718719                | -1.774180 | 0.342646  |
| 17               | 6                | 0              | 1.057175                | -4.100498 | -0.084849 |
| 18               | 6                | 0              | -2.109318               | -1.964804 | 4.810513  |
| 19               | 1                | 0              | -1.686566               | 0.554848  | 2.780840  |
| 20               | 1                | 0              | -0.913914               | 0.266711  | -2.396994 |
| 21               | 1                | 0              | -0.326691               | 2.657833  | -2.425985 |
| 22               | 1                | 0              | -1.542711               | 5.175234  | -1.928034 |
| 23               | 1                | 0              | -3.669364               | 6.162731  | -1.056271 |
| 24               | 1                | 0              | -5.566012               | 4.705142  | -0.397625 |
| 25               | 1                | 0              | -5.401316               | 2.232316  | -0.573329 |
| 26               | 1                | 0              | -1.093682               | -1.975953 | 5.236686  |
| 27               | 1                | 0              | -2.755594               | -1.436536 | 5.527349  |
| 28               | 1                | 0              | -2.462569               | -2.990524 | 4.656987  |
| 29               | 1                | 0              | 1.748155                | -4.160774 | 0.769487  |
| 30               | 1                | 0              | 0.475190                | -5.024992 | -0.177724 |
| 31               | 1                | 0              | 1.680318                | -3.959864 | -0.982665 |
| 32               | 21               | 0              | 2.029244                | -0.348172 | 0.218672  |
| 33               | 8                | 0              | 3.429211                | -0.836968 | 1.784294  |
| 34               | 16               | 0              | 4.285445                | -1.808407 | 0.977189  |
| 35               | 8                | 0              | 4.549539                | -3.111533 | 1.550575  |
| 36               | 8                | 0              | 3.660709                | -1.742660 | -0.402043 |
| 37               | 6                | 0              | 5.933363                | -0.932814 | 0.802321  |
| 38               | 8                | 0              | 3.102209                | 1.351248  | -0.835183 |
| 39               | 16               | 0              | 2.349220                | 1.196103  | -2.130345 |
| 40               | 8                | 0              | 1.451499                | -0.010190 | -1.877198 |
| 41               | 8                | 0              | 1.705627                | 2.358256  | -2.726337 |
| 42               | 6                | 0              | 3.615377                | 0.619611  | -3.388523 |
| 43               | 8                | 0              | 1.032617                | 0.999814  | 1.346894  |
| 44               | 16               | 0              | 0.056089                | 2.183572  | 1.363244  |
| 45               | 8                | 0              | 0.253164                | 3.098374  | 0.248228  |
| 46               | 8                | 0              | -1.316062               | 1.717233  | 1.653641  |

|    |   |   |           |           |           |
|----|---|---|-----------|-----------|-----------|
| 47 | 6 | 0 | 0.625105  | 3.075901  | 2.908028  |
| 48 | 9 | 0 | 6.721626  | -1.658940 | 0.022578  |
| 49 | 9 | 0 | 5.747577  | 0.262208  | 0.261901  |
| 50 | 9 | 0 | 6.483254  | -0.803292 | 2.000200  |
| 51 | 9 | 0 | 0.450665  | 2.293993  | 3.967618  |
| 52 | 9 | 0 | 1.907773  | 3.391059  | 2.795425  |
| 53 | 9 | 0 | -0.093260 | 4.181611  | 3.051749  |
| 54 | 9 | 0 | 4.476366  | 1.603066  | -3.602372 |
| 55 | 9 | 0 | 2.984589  | 0.321465  | -4.516103 |
| 56 | 9 | 0 | 4.254090  | -0.446059 | -2.937132 |
| 57 | 6 | 0 | -3.290481 | -1.583485 | -1.712044 |
| 58 | 1 | 0 | -2.367267 | -1.784154 | -2.261698 |
| 59 | 6 | 0 | -3.673414 | -0.267571 | -1.390594 |
| 60 | 1 | 0 | -4.158946 | -0.849085 | 0.891823  |
| 61 | 1 | 0 | -4.722010 | -0.138767 | -1.096788 |
| 62 | 6 | 0 | -4.343518 | -2.635026 | -1.825505 |
| 63 | 8 | 0 | -5.486508 | -2.530098 | -1.439450 |
| 64 | 8 | 0 | -3.858058 | -3.736737 | -2.424596 |
| 65 | 6 | 0 | -4.764580 | -4.830538 | -2.563410 |
| 66 | 1 | 0 | -5.653630 | -4.532199 | -3.139175 |
| 67 | 1 | 0 | -4.213633 | -5.618616 | -3.091144 |
| 68 | 1 | 0 | -5.093534 | -5.191350 | -1.576829 |
| 69 | 8 | 0 | -5.200717 | -0.452325 | 1.553115  |
| 70 | 8 | 0 | -6.035795 | 0.117450  | 0.828666  |

TS5' E= -4902.185153

| Center<br>Number | Atomic<br>Number | Atomic<br>Type | Coordinates (Angstroms) |           |           |
|------------------|------------------|----------------|-------------------------|-----------|-----------|
|                  |                  |                | X                       | Y         | Z         |
| 1                | 6                | 0              | -4.581757               | -0.481611 | -2.639532 |
| 2                | 6                | 0              | -4.693925               | -0.995924 | -1.319795 |
| 3                | 6                | 0              | -5.944161               | -0.957847 | -0.678672 |
| 4                | 6                | 0              | -7.032932               | -0.418743 | -1.360223 |
| 5                | 6                | 0              | -6.898555               | 0.085899  | -2.670914 |
| 6                | 6                | 0              | -5.671273               | 0.061381  | -3.329697 |
| 7                | 6                | 0              | -2.542585               | -1.211962 | -2.033018 |
| 8                | 6                | 0              | -3.371073               | -1.458589 | -0.936583 |
| 9                | 7                | 0              | -3.261473               | -0.640985 | -3.030679 |
| 10               | 46               | 0              | -1.929902               | -0.364055 | 1.499024  |
| 11               | 8                | 0              | 0.175912                | -1.281111 | 3.703086  |
| 12               | 8                | 0              | -2.134243               | 1.412033  | 2.767660  |
| 13               | 6                | 0              | -2.831619               | 2.424139  | 2.727597  |
| 14               | 8                | 0              | -3.456079               | 2.841522  | 1.647357  |
| 15               | 6                | 0              | 1.204267                | -0.942329 | 3.140780  |
| 16               | 8                | 0              | 1.217630                | -0.379768 | 1.944163  |
| 17               | 6                | 0              | 2.568780                | -1.142166 | 3.762828  |
| 18               | 6                | 0              | -3.027338               | 3.307569  | 3.924990  |
| 19               | 1                | 0              | -3.154094               | 2.314341  | 0.863889  |
| 20               | 1                | 0              | -1.478885               | -1.396013 | -2.165487 |
| 21               | 1                | 0              | -2.855912               | -0.306483 | -3.896724 |
| 22               | 1                | 0              | -5.564627               | 0.451639  | -4.344572 |
| 23               | 1                | 0              | -7.771913               | 0.502678  | -3.178209 |
| 24               | 1                | 0              | -8.010538               | -0.385354 | -0.873278 |
| 25               | 1                | 0              | -6.064042               | -1.344260 | 0.336557  |
| 26               | 1                | 0              | -2.477960               | 4.249152  | 3.763431  |
| 27               | 1                | 0              | -4.091244               | 3.564935  | 4.031815  |
| 28               | 1                | 0              | -2.652676               | 2.811951  | 4.827604  |
| 29               | 1                | 0              | 3.134437                | -0.198226 | 3.760196  |
| 30               | 1                | 0              | 2.467942                | -1.524085 | 4.785897  |
| 31               | 1                | 0              | 3.144715                | -1.854220 | 3.150541  |
| 32               | 21               | 0              | 1.819037                | 0.184907  | 0.208110  |
| 33               | 8                | 0              | 3.178191                | 1.812424  | 0.685819  |
| 34               | 16               | 0              | 4.399500                | 0.940766  | 0.948477  |

|    |    |   |           |           |           |
|----|----|---|-----------|-----------|-----------|
| 35 | 8  | 0 | 5.103336  | 1.123733  | 2.201823  |
| 36 | 8  | 0 | 3.905359  | -0.452369 | 0.604400  |
| 37 | 6  | 0 | 5.610053  | 1.384472  | -0.413032 |
| 38 | 8  | 0 | 2.375139  | 0.110141  | -2.019752 |
| 39 | 16 | 0 | 1.671366  | -1.196640 | -2.262443 |
| 40 | 8  | 0 | 1.127968  | -1.566399 | -0.879504 |
| 41 | 8  | 0 | 0.739625  | -1.316677 | -3.369155 |
| 42 | 6  | 0 | 3.029530  | -2.449337 | -2.580459 |
| 43 | 8  | 0 | 0.284667  | 1.469391  | -0.279120 |
| 44 | 16 | 0 | -0.965502 | 1.900605  | -1.027732 |
| 45 | 8  | 0 | -0.948539 | 1.618846  | -2.454053 |
| 46 | 8  | 0 | -2.183585 | 1.484790  | -0.270667 |
| 47 | 6  | 0 | -0.883404 | 3.760748  | -0.818859 |
| 48 | 9  | 0 | 6.641596  | 0.553696  | -0.345987 |
| 49 | 9  | 0 | 5.028687  | 1.280420  | -1.596217 |
| 50 | 9  | 0 | 6.025142  | 2.629257  | -0.225087 |
| 51 | 9  | 0 | -0.828842 | 4.064320  | 0.475833  |
| 52 | 9  | 0 | 0.190485  | 4.230066  | -1.430777 |
| 53 | 9  | 0 | -1.974687 | 4.298776  | -1.349219 |
| 54 | 9  | 0 | 3.649110  | -2.124563 | -3.706534 |
| 55 | 9  | 0 | 2.483479  | -3.651632 | -2.701469 |
| 56 | 9  | 0 | 3.893724  | -2.449759 | -1.578301 |
| 57 | 6  | 0 | -1.683524 | -2.378384 | 0.711330  |
| 58 | 1  | 0 | -0.846621 | -2.317852 | 0.010516  |
| 59 | 6  | 0 | -2.985496 | -2.017069 | 0.332931  |
| 60 | 1  | 0 | -1.488042 | -1.092373 | 2.733312  |
| 61 | 1  | 0 | -3.788727 | -2.347605 | 1.000220  |
| 62 | 6  | 0 | -1.517767 | -3.379766 | 1.812910  |
| 63 | 8  | 0 | -2.398486 | -3.777585 | 2.539865  |
| 64 | 8  | 0 | -0.246171 | -3.809942 | 1.875727  |
| 65 | 6  | 0 | 0.062517  | -4.706237 | 2.943969  |
| 66 | 1  | 0 | -0.622933 | -5.566210 | 2.946832  |
| 67 | 1  | 0 | 1.094401  | -5.038584 | 2.774968  |
| 68 | 1  | 0 | -0.015563 | -4.181709 | 3.908339  |

Int6' E= -4902.188871

| Center<br>Number | Atomic<br>Number | Atomic<br>Type | Coordinates (Angstroms) |           |           |
|------------------|------------------|----------------|-------------------------|-----------|-----------|
|                  |                  |                | X                       | Y         | Z         |
| 1                | 6                | 0              | 3.297353                | -3.458277 | -0.801924 |
| 2                | 6                | 0              | 4.149583                | -2.347205 | -0.540446 |
| 3                | 6                | 0              | 5.361796                | -2.564838 | 0.140533  |
| 4                | 6                | 0              | 5.687564                | -3.856503 | 0.544046  |
| 5                | 6                | 0              | 4.825181                | -4.943397 | 0.279534  |
| 6                | 6                | 0              | 3.621919                | -4.759687 | -0.396455 |
| 7                | 6                | 0              | 2.307579                | -1.626788 | -1.640094 |
| 8                | 6                | 0              | 3.496535                | -1.173597 | -1.086536 |
| 9                | 7                | 0              | 2.198249                | -2.981730 | -1.484645 |
| 10               | 46               | 0              | 2.675925                | 1.424624  | 0.143438  |
| 11               | 8                | 0              | 0.149689                | 4.049372  | 0.192231  |
| 12               | 8                | 0              | 1.496103                | 2.456349  | 1.732694  |
| 13               | 6                | 0              | 1.621489                | 2.513235  | 2.969742  |
| 14               | 8                | 0              | 1.831333                | 1.467520  | 3.707197  |
| 15               | 6                | 0              | -0.795108               | 3.399108  | -0.395396 |
| 16               | 8                | 0              | -0.948094               | 2.171917  | -0.216288 |
| 17               | 6                | 0              | -1.705703               | 4.177091  | -1.288833 |
| 18               | 6                | 0              | 1.571984                | 3.816203  | 3.712893  |
| 19               | 1                | 0              | 1.779743                | 0.602944  | 3.193244  |
| 20               | 1                | 0              | 1.511724                | -1.061918 | -2.119551 |
| 21               | 1                | 0              | 1.344649                | -3.493801 | -1.676273 |
| 22               | 1                | 0              | 2.953211                | -5.599321 | -0.601482 |
| 23               | 1                | 0              | 5.107528                | -5.945984 | 0.611090  |
| 24               | 1                | 0              | 6.625611                | -4.036259 | 1.075558  |

|    |    |   |           |           |           |
|----|----|---|-----------|-----------|-----------|
| 25 | 1  | 0 | 6.037724  | -1.732535 | 0.352592  |
| 26 | 1  | 0 | 1.215918  | 3.669130  | 4.740399  |
| 27 | 1  | 0 | 2.596895  | 4.221777  | 3.758187  |
| 28 | 1  | 0 | 0.944233  | 4.541714  | 3.179229  |
| 29 | 1  | 0 | -2.739223 | 4.056702  | -0.927390 |
| 30 | 1  | 0 | -1.426180 | 5.236165  | -1.317678 |
| 31 | 1  | 0 | -1.666061 | 3.741754  | -2.299343 |
| 32 | 21 | 0 | -1.774229 | 0.307782  | -0.034560 |
| 33 | 8  | 0 | -3.337916 | 0.896567  | 1.311492  |
| 34 | 16 | 0 | -4.309790 | 1.444981  | 0.266699  |
| 35 | 8  | 0 | -4.820860 | 2.786258  | 0.470337  |
| 36 | 8  | 0 | -3.600373 | 1.147448  | -1.036560 |
| 37 | 6  | 0 | -5.770862 | 0.270104  | 0.324449  |
| 38 | 8  | 0 | -2.440584 | -1.722759 | -0.533238 |
| 39 | 16 | 0 | -1.664331 | -1.818361 | -1.833877 |
| 40 | 8  | 0 | -1.011447 | -0.439810 | -1.922436 |
| 41 | 8  | 0 | -0.825568 | -2.975996 | -2.068881 |
| 42 | 6  | 0 | -2.960930 | -1.850030 | -3.192978 |
| 43 | 8  | 0 | -0.574844 | -0.326578 | 1.415723  |
| 44 | 16 | 0 | 0.319779  | -1.452958 | 1.988945  |
| 45 | 8  | 0 | 0.418082  | -2.597109 | 1.102078  |
| 46 | 8  | 0 | 1.545569  | -0.873994 | 2.568657  |
| 47 | 6  | 0 | -0.718309 | -1.972097 | 3.461581  |
| 48 | 9  | 0 | -6.621678 | 0.609868  | -0.631618 |
| 49 | 9  | 0 | -5.350040 | -0.969792 | 0.133778  |
| 50 | 9  | 0 | -6.355798 | 0.372327  | 1.506813  |
| 51 | 9  | 0 | -0.783301 | -0.970469 | 4.333111  |
| 52 | 9  | 0 | -1.942854 | -2.285259 | 3.056964  |
| 53 | 9  | 0 | -0.156544 | -3.024266 | 4.036294  |
| 54 | 9  | 0 | -3.598230 | -3.008432 | -3.128007 |
| 55 | 9  | 0 | -2.344973 | -1.737644 | -4.359599 |
| 56 | 9  | 0 | -3.818665 | -0.856163 | -3.039356 |
| 57 | 6  | 0 | 3.545591  | 1.284828  | -1.796161 |
| 58 | 1  | 0 | 2.754777  | 1.164436  | -2.542573 |
| 59 | 6  | 0 | 3.995781  | 0.196062  | -1.023229 |
| 60 | 1  | 0 | 0.717116  | 3.445703  | 0.785178  |
| 61 | 1  | 0 | 4.984695  | 0.316961  | -0.566220 |
| 62 | 6  | 0 | 4.413254  | 2.470353  | -1.982251 |
| 63 | 8  | 0 | 5.505006  | 2.660380  | -1.490319 |
| 64 | 8  | 0 | 3.835605  | 3.364251  | -2.830974 |
| 65 | 6  | 0 | 4.583679  | 4.545500  | -3.086261 |
| 66 | 1  | 0 | 5.572936  | 4.307933  | -3.507656 |
| 67 | 1  | 0 | 3.998556  | 5.133842  | -3.805591 |
| 68 | 1  | 0 | 4.739011  | 5.125665  | -2.162287 |

TS6' E= -5052.587842

| Center<br>Number | Atomic<br>Number | Atomic<br>Type | Coordinates (Angstroms) |           |           |
|------------------|------------------|----------------|-------------------------|-----------|-----------|
|                  |                  |                | X                       | Y         | Z         |
| 1                | 6                | 0              | -4.143598               | 2.162799  | -2.004964 |
| 2                | 6                | 0              | -4.692415               | 1.006884  | -1.380608 |
| 3                | 6                | 0              | -6.021150               | 1.048213  | -0.917619 |
| 4                | 6                | 0              | -6.754468               | 2.220605  | -1.078537 |
| 5                | 6                | 0              | -6.188804               | 3.357439  | -1.696249 |
| 6                | 6                | 0              | -4.879040               | 3.343830  | -2.168863 |
| 7                | 6                | 0              | -2.549553               | 0.582100  | -1.991844 |
| 8                | 6                | 0              | -3.650296               | -0.003420 | -1.373544 |
| 9                | 7                | 0              | -2.847289               | 1.858875  | -2.370581 |
| 10               | 46               | 0              | -2.363852               | -1.298578 | 0.990706  |
| 11               | 8                | 0              | 0.475492                | 0.179357  | 3.782166  |
| 12               | 8                | 0              | -1.711391               | 0.413710  | 2.477941  |
| 13               | 6                | 0              | -2.447890               | 1.408295  | 2.601159  |
| 14               | 8                | 0              | -3.661039               | 1.424809  | 2.126923  |
| 15               | 6                | 0              | 1.585446                | 0.336107  | 3.151230  |



|    |    |   |           |           |           |
|----|----|---|-----------|-----------|-----------|
| 16 | 8  | 0 | 1.612404  | 0.642980  | 1.938077  |
| 17 | 6  | 0 | 2.841045  | 0.118239  | 3.932477  |
| 18 | 6  | 0 | -2.001742 | 2.675450  | 3.256971  |
| 19 | 1  | 0 | -3.871916 | 0.549088  | 1.724388  |
| 20 | 1  | 0 | -1.561741 | 0.165168  | -2.176007 |
| 21 | 1  | 0 | -2.140250 | 2.521138  | -2.680559 |
| 22 | 1  | 0 | -4.440870 | 4.220996  | -2.650968 |
| 23 | 1  | 0 | -6.790791 | 4.262659  | -1.808291 |
| 24 | 1  | 0 | -7.787179 | 2.263875  | -0.723702 |
| 25 | 1  | 0 | -6.475301 | 0.175031  | -0.441676 |
| 26 | 1  | 0 | -1.439522 | 3.243614  | 2.496962  |
| 27 | 1  | 0 | -2.861406 | 3.268919  | 3.590538  |
| 28 | 1  | 0 | -1.330637 | 2.454115  | 4.097660  |
| 29 | 1  | 0 | 3.570565  | 0.907702  | 3.703485  |
| 30 | 1  | 0 | 2.635163  | 0.064434  | 5.007560  |
| 31 | 1  | 0 | 3.289955  | -0.828478 | 3.589676  |
| 32 | 21 | 0 | 2.263238  | 0.388742  | 0.007487  |
| 33 | 8  | 0 | 4.234567  | 1.233977  | 0.062272  |
| 34 | 16 | 0 | 4.942246  | 0.067470  | 0.750364  |
| 35 | 8  | 0 | 5.752574  | 0.369817  | 1.912603  |
| 36 | 8  | 0 | 3.830088  | -0.952415 | 0.903512  |
| 37 | 6  | 0 | 6.085443  | -0.634523 | -0.561368 |
| 38 | 8  | 0 | 2.418077  | -0.689806 | -1.880937 |
| 39 | 16 | 0 | 1.202333  | -1.572897 | -1.650437 |
| 40 | 8  | 0 | 0.771122  | -1.165879 | -0.243098 |
| 41 | 8  | 0 | 0.186165  | -1.613947 | -2.682829 |
| 42 | 6  | 0 | 1.873416  | -3.316887 | -1.470138 |
| 43 | 8  | 0 | 1.372533  | 1.982449  | -0.732536 |
| 44 | 16 | 0 | 0.320542  | 3.120102  | -0.795359 |
| 45 | 8  | 0 | -0.246687 | 3.228559  | -2.137206 |
| 46 | 8  | 0 | -0.559059 | 3.095922  | 0.370659  |
| 47 | 6  | 0 | 1.443743  | 4.602732  | -0.577839 |
| 48 | 9  | 0 | 6.662865  | -1.722219 | -0.073989 |
| 49 | 9  | 0 | 5.387873  | -0.940544 | -1.642478 |
| 50 | 9  | 0 | 7.003709  | 0.271107  | -0.855803 |
| 51 | 9  | 0 | 2.072257  | 4.511263  | 0.591532  |
| 52 | 9  | 0 | 2.334796  | 4.652192  | -1.555770 |
| 53 | 9  | 0 | 0.702388  | 5.703149  | -0.592905 |
| 54 | 9  | 0 | 2.398934  | -3.685166 | -2.627707 |
| 55 | 9  | 0 | 0.876911  | -4.120879 | -1.145485 |
| 56 | 9  | 0 | 2.801660  | -3.339930 | -0.526624 |
| 57 | 6  | 0 | -2.822499 | -2.370775 | -0.849929 |
| 58 | 1  | 0 | -1.927086 | -2.294525 | -1.471726 |
| 59 | 6  | 0 | -3.744593 | -1.317839 | -0.758284 |
| 60 | 1  | 0 | -0.360214 | 0.296388  | 3.192819  |
| 61 | 1  | 0 | -4.728407 | -1.592619 | -0.361115 |
| 62 | 6  | 0 | -3.247821 | -3.745950 | -0.494580 |
| 63 | 8  | 0 | -4.336984 | -4.078456 | -0.082678 |
| 64 | 8  | 0 | -2.238762 | -4.628332 | -0.698902 |
| 65 | 6  | 0 | -2.525844 | -5.986667 | -0.383374 |
| 66 | 1  | 0 | -3.373073 | -6.360861 | -0.978731 |
| 67 | 1  | 0 | -1.616889 | -6.555149 | -0.618809 |
| 68 | 1  | 0 | -2.779074 | -6.099489 | 0.682439  |
| 69 | 8  | 0 | -3.496141 | -2.183523 | 2.748851  |
| 70 | 8  | 0 | -4.333195 | -1.361530 | 3.169660  |

-----  
Int7<sup>3</sup> triplet      E= -5052.607425

| Center<br>Number | Atomic<br>Number | Atomic<br>Type | Coordinates (Angstroms) |          |           |
|------------------|------------------|----------------|-------------------------|----------|-----------|
|                  |                  |                | X                       | Y        | Z         |
| 1                | 6                | 0              | -1.969456               | 3.914648 | -0.338622 |
| 2                | 6                | 0              | -3.165009               | 3.162807 | -0.202721 |
| 3                | 6                | 0              | -4.228669               | 3.698019 | 0.542289  |
| 4                | 6                | 0              | -4.071189               | 4.954622 | 1.124368  |

|    |    |   |           |           |           |
|----|----|---|-----------|-----------|-----------|
| 5  | 6  | 0 | -2.872860 | 5.684096  | 0.977931  |
| 6  | 6  | 0 | -1.802771 | 5.175193  | 0.243875  |
| 7  | 6  | 0 | -1.658534 | 2.005573  | -1.472354 |
| 8  | 6  | 0 | -2.959875 | 1.920767  | -0.934356 |
| 9  | 7  | 0 | -1.089112 | 3.173685  | -1.116045 |
| 10 | 46 | 0 | -2.893103 | -0.544856 | 0.316510  |
| 11 | 8  | 0 | -0.505464 | 1.630250  | 2.908286  |
| 12 | 8  | 0 | -2.008860 | -0.275746 | 2.423443  |
| 13 | 6  | 0 | -2.454459 | -0.835787 | 3.538906  |
| 14 | 8  | 0 | -3.246564 | -1.766220 | 3.501153  |
| 15 | 6  | 0 | 0.708660  | 1.702805  | 2.648930  |
| 16 | 8  | 0 | 1.311521  | 0.827166  | 1.916853  |
| 17 | 6  | 0 | 1.548632  | 2.823387  | 3.194619  |
| 18 | 6  | 0 | -1.928066 | -0.294323 | 4.841855  |
| 19 | 1  | 0 | -3.655669 | -2.654349 | 2.333722  |
| 20 | 1  | 0 | -1.122191 | 1.282638  | -2.084518 |
| 21 | 1  | 0 | -0.125155 | 3.452456  | -1.349222 |
| 22 | 1  | 0 | -0.871795 | 5.733247  | 0.123971  |
| 23 | 1  | 0 | -2.782590 | 6.666652  | 1.447237  |
| 24 | 1  | 0 | -4.890435 | 5.385132  | 1.705134  |
| 25 | 1  | 0 | -5.162876 | 3.144654  | 0.665805  |
| 26 | 1  | 0 | -1.933254 | 0.804212  | 4.846631  |
| 27 | 1  | 0 | -2.526960 | -0.697709 | 5.666403  |
| 28 | 1  | 0 | -0.881021 | -0.616292 | 4.965656  |
| 29 | 1  | 0 | 2.070659  | 3.323619  | 2.363990  |
| 30 | 1  | 0 | 0.932225  | 3.531944  | 3.760150  |
| 31 | 1  | 0 | 2.330234  | 2.397874  | 3.844516  |
| 32 | 21 | 0 | 2.001543  | -0.120751 | 0.349317  |
| 33 | 8  | 0 | 4.110718  | -0.375355 | 0.720821  |
| 34 | 16 | 0 | 3.993907  | -1.660797 | 1.534450  |
| 35 | 8  | 0 | 4.676796  | -1.724441 | 2.807316  |
| 36 | 8  | 0 | 2.500072  | -1.935664 | 1.499232  |
| 37 | 6  | 0 | 4.751798  | -2.983736 | 0.442715  |
| 38 | 8  | 0 | 1.904021  | -1.291437 | -1.568401 |
| 39 | 16 | 0 | 0.407758  | -1.472481 | -1.549804 |
| 40 | 8  | 0 | -0.007369 | -0.830697 | -0.226157 |
| 41 | 8  | 0 | -0.355540 | -1.085393 | -2.724937 |
| 42 | 6  | 0 | 0.136869  | -3.312772 | -1.302353 |
| 43 | 8  | 0 | 2.201117  | 1.532320  | -0.791094 |
| 44 | 16 | 0 | 2.668079  | 2.998962  | -0.882245 |
| 45 | 8  | 0 | 1.624314  | 3.821168  | -1.515723 |
| 46 | 8  | 0 | 3.289837  | 3.473220  | 0.348920  |
| 47 | 6  | 0 | 4.028746  | 2.853775  | -2.159840 |
| 48 | 9  | 0 | 4.601378  | -4.158617 | 1.038159  |
| 49 | 9  | 0 | 4.149399  | -3.000347 | -0.736353 |
| 50 | 9  | 0 | 6.040627  | -2.723086 | 0.284419  |
| 51 | 9  | 0 | 4.953137  | 2.005054  | -1.730972 |
| 52 | 9  | 0 | 3.523335  | 2.418064  | -3.306219 |
| 53 | 9  | 0 | 4.573542  | 4.049981  | -2.341401 |
| 54 | 9  | 0 | 0.540507  | -3.950015 | -2.390020 |
| 55 | 9  | 0 | -1.154739 | -3.533923 | -1.103362 |
| 56 | 9  | 0 | 0.828731  | -3.727369 | -0.253464 |
| 57 | 6  | 0 | -3.666968 | -0.362120 | -1.751711 |
| 58 | 1  | 0 | -2.774781 | -0.532328 | -2.360591 |
| 59 | 6  | 0 | -3.905935 | 0.848799  | -1.094461 |
| 60 | 1  | 0 | -1.320527 | 0.527594  | 2.576187  |
| 61 | 1  | 0 | -4.926688 | 1.013737  | -0.733527 |
| 62 | 6  | 0 | -4.809315 | -1.291283 | -1.976603 |
| 63 | 8  | 0 | -5.926131 | -1.145109 | -1.532665 |
| 64 | 8  | 0 | -4.436298 | -2.331692 | -2.738666 |
| 65 | 6  | 0 | -5.426152 | -3.334822 | -2.964750 |
| 66 | 1  | 0 | -6.318719 | -2.904544 | -3.443280 |
| 67 | 1  | 0 | -4.961372 | -4.079878 | -3.621959 |
| 68 | 1  | 0 | -5.726096 | -3.799420 | -2.013261 |
| 69 | 8  | 0 | -3.704646 | -2.601007 | 0.451383  |
| 70 | 8  | 0 | -3.906362 | -3.276662 | 1.556779  |

Int7<sup>singlet</sup>

E= -5052.628832

| Center<br>Number | Atomic<br>Number | Atomic<br>Type | Coordinates (Angstroms) |           |           |
|------------------|------------------|----------------|-------------------------|-----------|-----------|
|                  |                  |                | X                       | Y         | Z         |
| 1                | 6                | 0              | -2.094680               | 3.718148  | 0.288675  |
| 2                | 6                | 0              | -3.315491               | 3.001073  | 0.285064  |
| 3                | 6                | 0              | -4.394876               | 3.477095  | 1.043899  |
| 4                | 6                | 0              | -4.223768               | 4.649938  | 1.778568  |
| 5                | 6                | 0              | -2.998738               | 5.347266  | 1.770062  |
| 6                | 6                | 0              | -1.912084               | 4.891668  | 1.024484  |
| 7                | 6                | 0              | -1.778077               | 1.956266  | -1.060849 |
| 8                | 6                | 0              | -3.112479               | 1.845737  | -0.584810 |
| 9                | 7                | 0              | -1.200241               | 3.045863  | -0.541688 |
| 10               | 46               | 0              | -2.959024               | -0.482773 | 0.346614  |
| 11               | 8                | 0              | -0.323972               | 1.507097  | 2.727905  |
| 12               | 8                | 0              | -1.706394               | -0.557979 | 2.261305  |
| 13               | 6                | 0              | -1.461721               | -1.574848 | 3.112792  |
| 14               | 8                | 0              | -2.208403               | -2.526965 | 3.171641  |
| 15               | 6                | 0              | 0.872235                | 1.720478  | 2.494167  |
| 16               | 8                | 0              | 1.585983                | 0.939585  | 1.741950  |
| 17               | 6                | 0              | 1.591131                | 2.898854  | 3.093944  |
| 18               | 6                | 0              | -0.212678               | -1.456319 | 3.945571  |
| 19               | 1                | 0              | -3.690392               | -2.540652 | 2.371479  |
| 20               | 1                | 0              | -1.244212               | 1.308617  | -1.754000 |
| 21               | 1                | 0              | -0.217818               | 3.326486  | -0.701008 |
| 22               | 1                | 0              | -0.959161               | 5.424142  | 1.009818  |
| 23               | 1                | 0              | -2.899337               | 6.262367  | 2.358471  |
| 24               | 1                | 0              | -5.053738               | 5.036626  | 2.374349  |
| 25               | 1                | 0              | -5.348508               | 2.944445  | 1.064141  |
| 26               | 1                | 0              | -0.151010               | -0.467395 | 4.421866  |
| 27               | 1                | 0              | -0.216675               | -2.247624 | 4.703975  |
| 28               | 1                | 0              | 0.670718                | -1.577518 | 3.296944  |
| 29               | 1                | 0              | 2.119419                | 3.453183  | 2.304315  |
| 30               | 1                | 0              | 0.890177                | 3.544858  | 3.635586  |
| 31               | 1                | 0              | 2.365436                | 2.525155  | 3.783646  |
| 32               | 21               | 0              | 2.193032                | -0.072682 | 0.191489  |
| 33               | 8                | 0              | 4.218867                | -0.644291 | 0.613065  |
| 34               | 16               | 0              | 3.907068                | -1.887834 | 1.442890  |
| 35               | 8                | 0              | 4.558691                | -2.030219 | 2.725361  |
| 36               | 8                | 0              | 2.389809                | -1.944750 | 1.390637  |
| 37               | 6                | 0              | 4.475311                | -3.319580 | 0.372551  |
| 38               | 8                | 0              | 1.954420                | -1.169314 | -1.756053 |
| 39               | 16               | 0              | 0.451038                | -1.266899 | -1.677482 |
| 40               | 8                | 0              | 0.130738                | -0.642996 | -0.321756 |
| 41               | 8                | 0              | -0.342993               | -0.789005 | -2.799815 |
| 42               | 6                | 0              | 0.080068                | -3.098545 | -1.491887 |
| 43               | 8                | 0              | 2.518357                | 1.595813  | -0.918750 |
| 44               | 16               | 0              | 2.738025                | 3.110885  | -0.741267 |
| 45               | 8                | 0              | 1.447958                | 3.827001  | -0.776801 |
| 46               | 8                | 0              | 3.677285                | 3.439903  | 0.322317  |
| 47               | 6                | 0              | 3.570738                | 3.519515  | -2.366083 |
| 48               | 9                | 0              | 4.158660                | -4.452623 | 0.982278  |
| 49               | 9                | 0              | 3.877533                | -3.265302 | -0.808692 |
| 50               | 9                | 0              | 5.787508                | -3.245197 | 0.214911  |
| 51               | 9                | 0              | 4.715706                | 2.859463  | -2.461539 |
| 52               | 9                | 0              | 2.776336                | 3.182222  | -3.374654 |
| 53               | 9                | 0              | 3.805223                | 4.825073  | -2.406100 |
| 54               | 9                | 0              | 0.436435                | -3.712380 | -2.609777 |
| 55               | 9                | 0              | -1.217760               | -3.252112 | -1.285663 |
| 56               | 9                | 0              | 0.761063                | -3.590472 | -0.470188 |
| 57               | 6                | 0              | -3.750305               | -0.325443 | -1.656912 |
| 58               | 1                | 0              | -2.843896               | -0.416193 | -2.263738 |
| 59               | 6                | 0              | -4.071464               | 0.837519  | -0.935524 |
| 60               | 1                | 0              | -1.080983               | 0.258926  | 2.389881  |

|    |   |   |           |           |           |
|----|---|---|-----------|-----------|-----------|
| 61 | 1 | 0 | -5.111756 | 0.959746  | -0.617329 |
| 62 | 6 | 0 | -4.841274 | -1.310196 | -1.936243 |
| 63 | 8 | 0 | -6.000614 | -1.152395 | -1.636229 |
| 64 | 8 | 0 | -4.355842 | -2.386179 | -2.564536 |
| 65 | 6 | 0 | -5.281412 | -3.449753 | -2.799922 |
| 66 | 1 | 0 | -6.129122 | -3.101123 | -3.408486 |
| 67 | 1 | 0 | -4.721424 | -4.228239 | -3.331685 |
| 68 | 1 | 0 | -5.664675 | -3.837400 | -1.844523 |
| 69 | 8 | 0 | -3.699810 | -2.304493 | 0.530733  |
| 70 | 8 | 0 | -4.411200 | -2.363976 | 1.708510  |

H<sub>2</sub>O<sub>2</sub> E= -151.6343747

| Center Number | Atomic Number | Atomic Type | Coordinates (Angstroms) |           |           |
|---------------|---------------|-------------|-------------------------|-----------|-----------|
|               |               |             | X                       | Y         | Z         |
| 1             | 8             | 0           | 0.000000                | 0.720983  | -0.052431 |
| 2             | 1             | 0           | 0.829842                | 0.896146  | 0.419445  |
| 3             | 8             | 0           | 0.000000                | -0.720983 | -0.052431 |
| 4             | 1             | 0           | -0.829842               | -0.896146 | 0.419445  |

(E)-methyl 3-(1H-indol-3-yl)acrylate E= -669.4123873

| Center Number | Atomic Number | Atomic Type | Coordinates (Angstroms) |           |           |
|---------------|---------------|-------------|-------------------------|-----------|-----------|
|               |               |             | X                       | Y         | Z         |
| 1             | 6             | 0           | 2.777486                | 0.776624  | 0.000073  |
| 2             | 6             | 0           | 1.750070                | -0.206218 | -0.000211 |
| 3             | 6             | 0           | 2.112183                | -1.565986 | -0.000373 |
| 4             | 6             | 0           | 3.462138                | -1.904234 | -0.000304 |
| 5             | 6             | 0           | 4.465367                | -0.910532 | -0.000063 |
| 6             | 6             | 0           | 4.138075                | 0.442642  | 0.000168  |
| 7             | 6             | 0           | 0.798386                | 1.851439  | 0.000172  |
| 8             | 6             | 0           | 0.480702                | 0.499441  | -0.000016 |
| 9             | 7             | 0           | 2.158003                | 2.013127  | 0.000348  |
| 10            | 1             | 0           | 0.137423                | 2.716110  | 0.000261  |
| 11            | 1             | 0           | 2.635516                | 2.904802  | -0.001640 |
| 12            | 1             | 0           | 4.913778                | 1.212501  | 0.000328  |
| 13            | 1             | 0           | 5.516686                | -1.208692 | -0.000070 |
| 14            | 1             | 0           | 3.754551                | -2.957119 | -0.000419 |
| 15            | 1             | 0           | 1.347119                | -2.346123 | -0.000475 |
| 16            | 6             | 0           | -2.033593               | 0.507183  | 0.000054  |
| 17            | 1             | 0           | -2.141212               | 1.594457  | -0.000452 |
| 18            | 6             | 0           | -0.830993               | -0.111018 | 0.000299  |
| 19            | 1             | 0           | -0.858296               | -1.206308 | 0.000689  |
| 20            | 6             | 0           | -3.277797               | -0.282539 | 0.000190  |
| 21            | 8             | 0           | -3.360254               | -1.492329 | 0.000872  |
| 22            | 8             | 0           | -4.365863               | 0.525410  | -0.000513 |
| 23            | 6             | 0           | -5.629303               | -0.129635 | -0.000400 |
| 24            | 1             | 0           | -5.746025               | -0.764627 | 0.891833  |
| 25            | 1             | 0           | -6.388330               | 0.663201  | -0.002327 |
| 26            | 1             | 0           | -5.744609               | -0.767751 | -0.890560 |
